# Supplementary material
Source: ML conference proceedings conference paper supplement (https://openreview.net/forum?id=fxlrnYBOZ4)

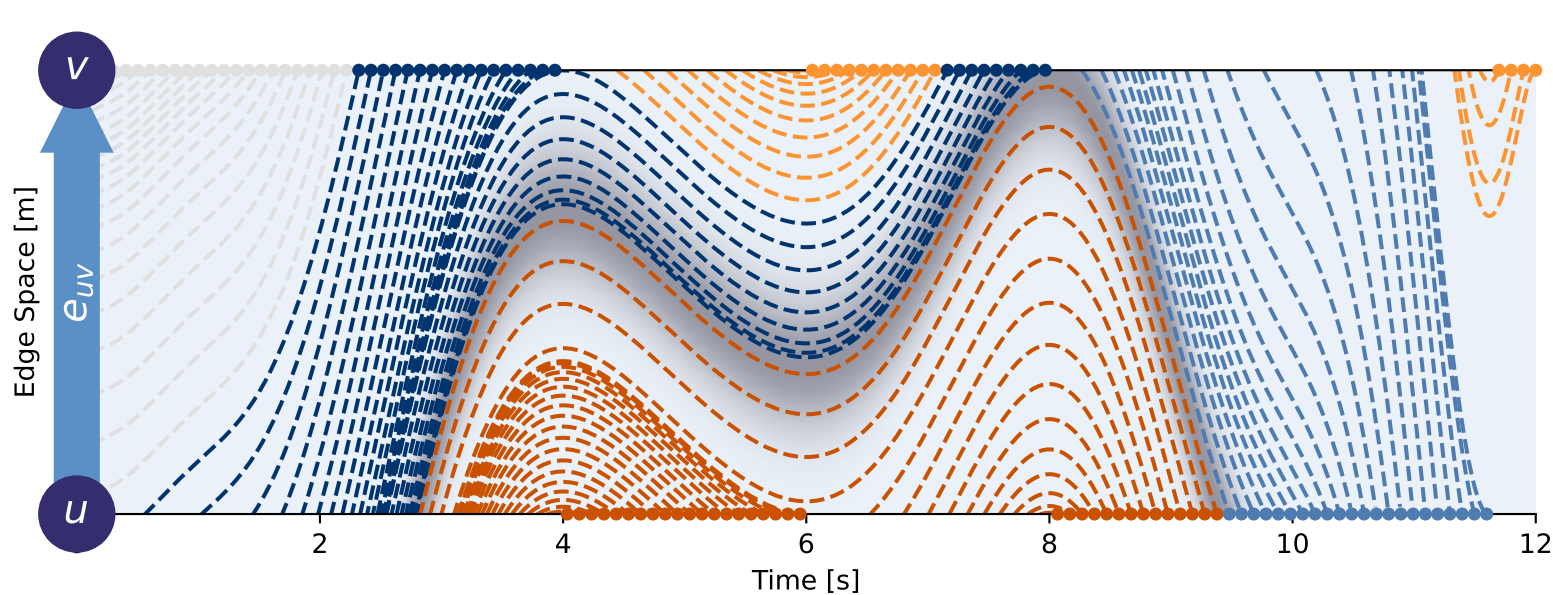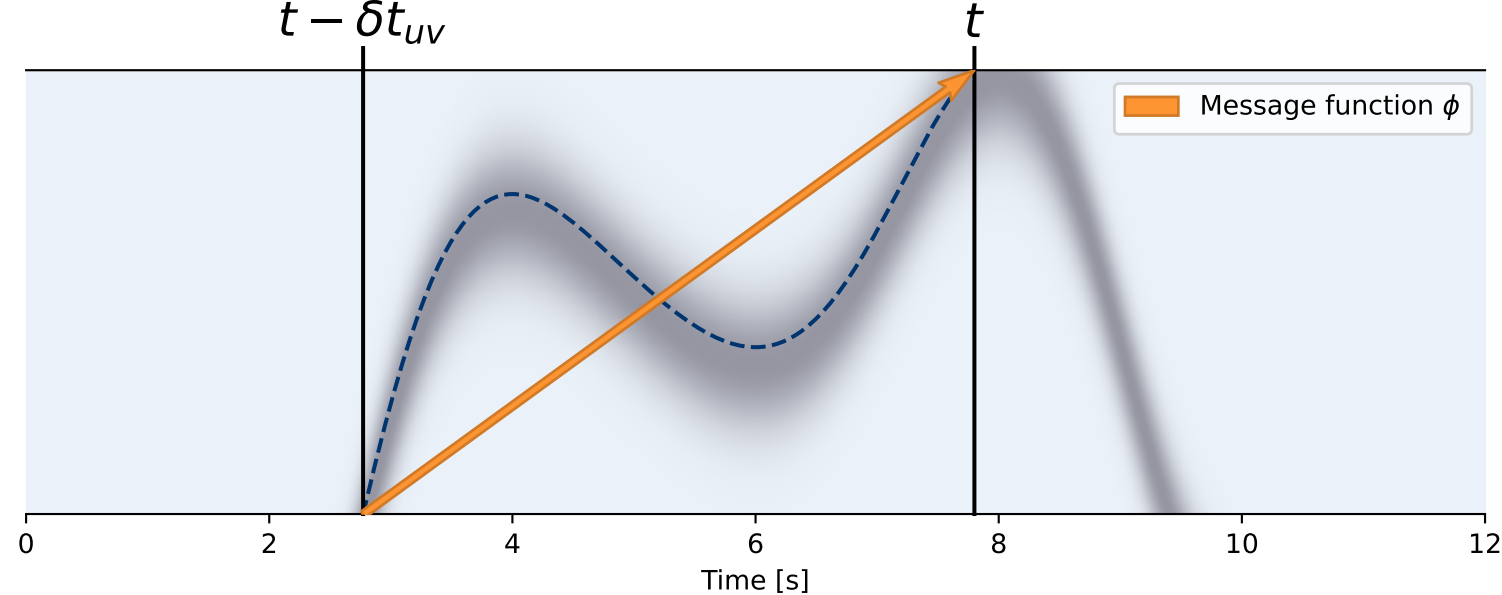

Supplement: supplementary_material [file Characteristic_curves.pdf › mega_mp_advection_on_metric_graphs/Characteristic_curves.pdf]

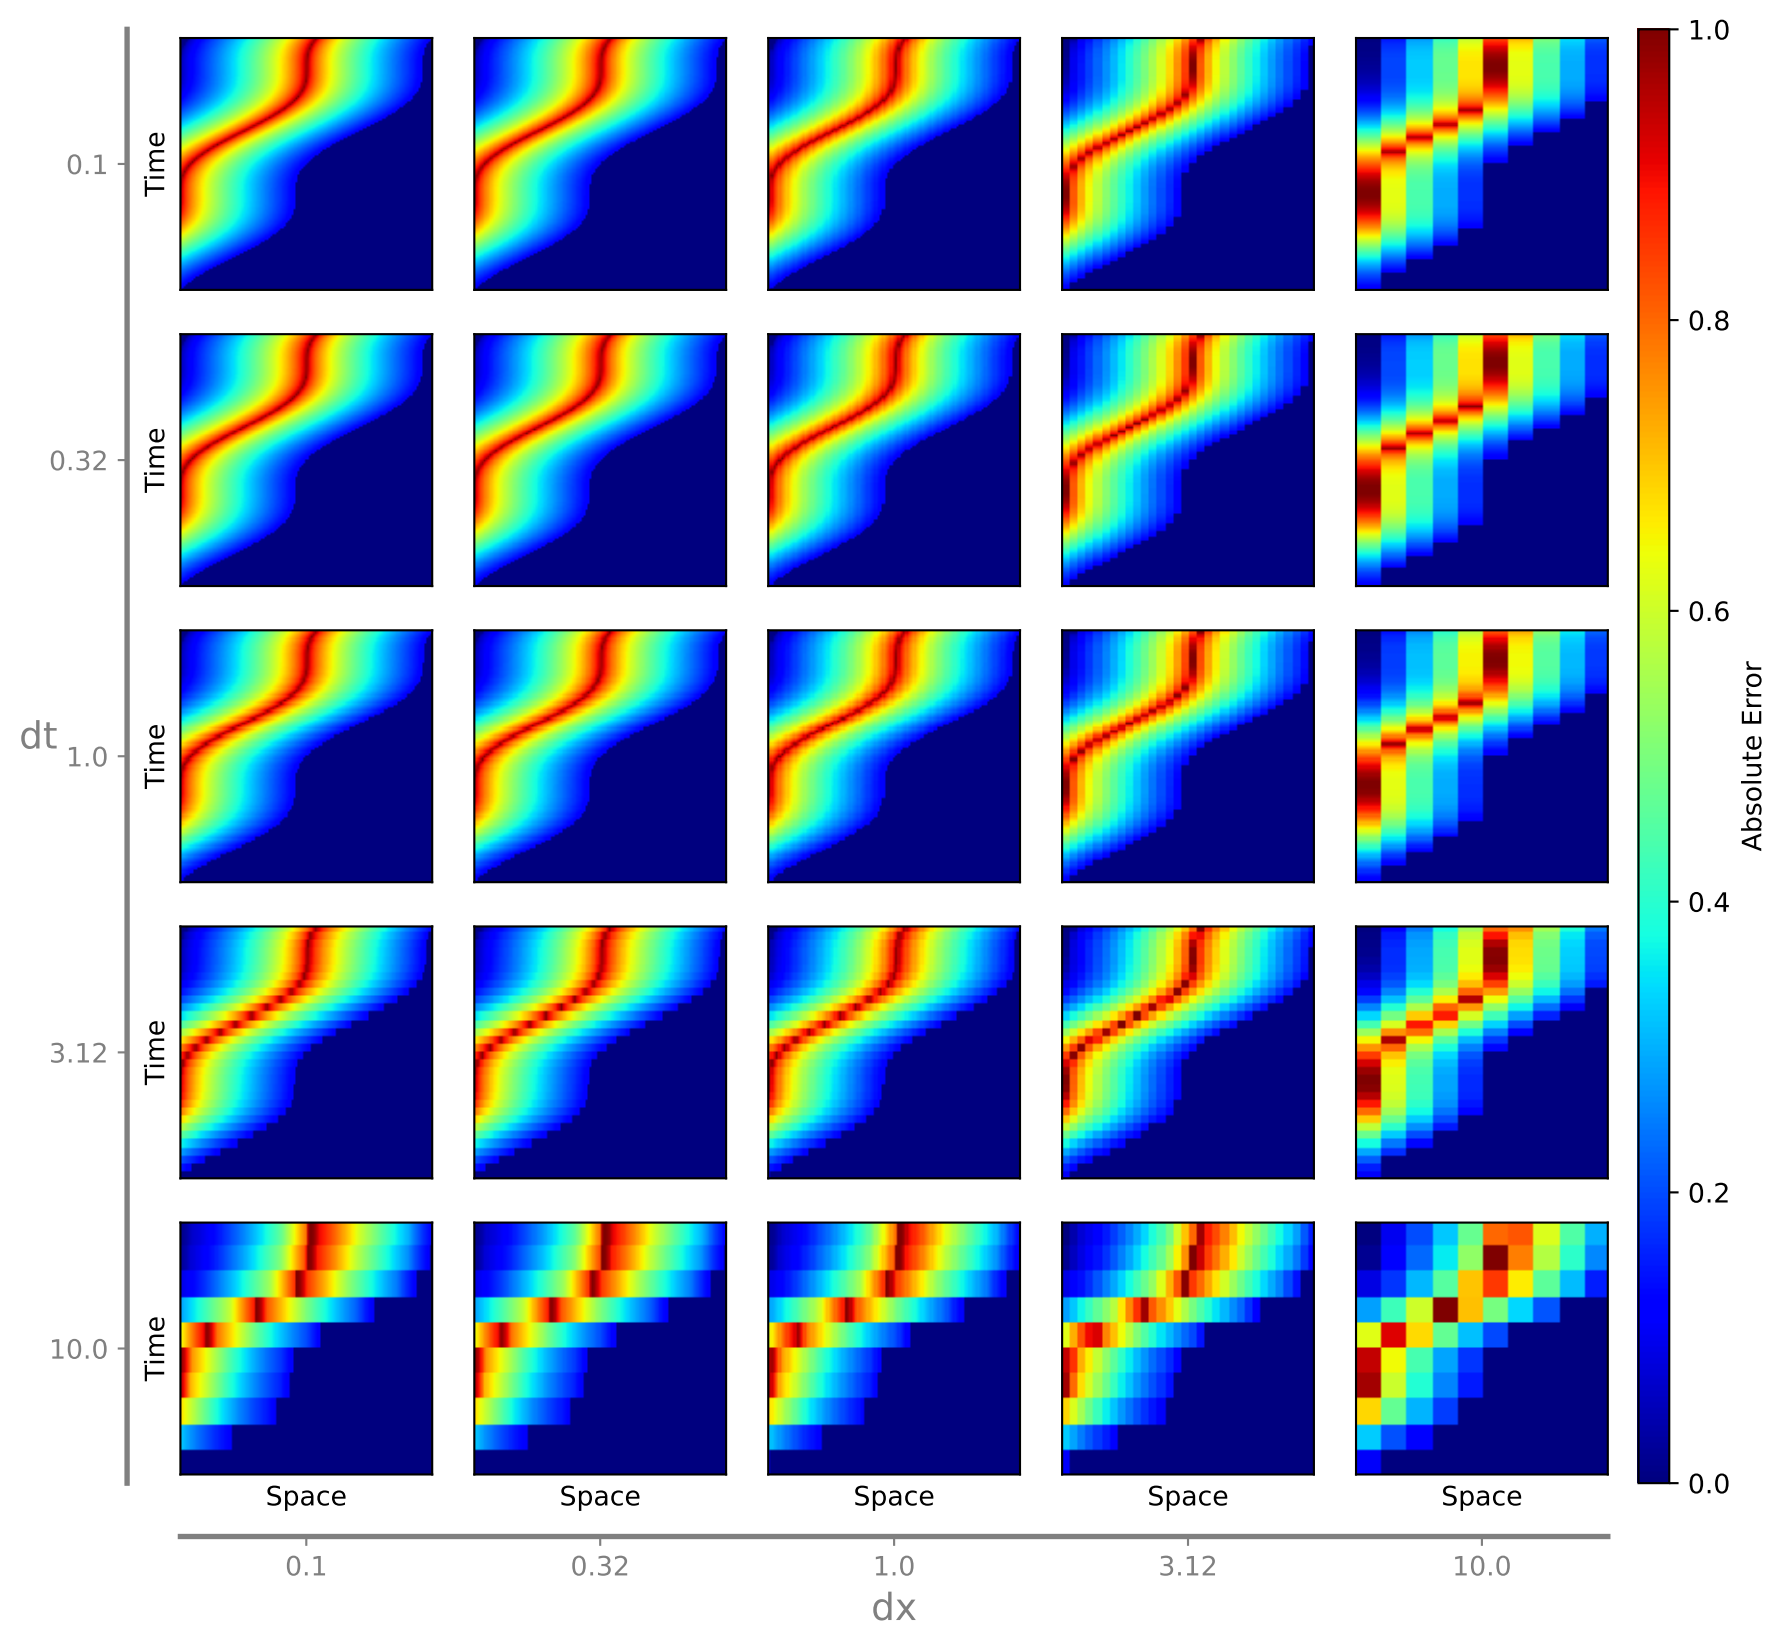

Supplement: supplementary_material [file analytical_result_spacetime_varying_discretization_exp_0.pdf › mega_mp_advection_on_metric_graphs/Results/Figures/analytical_result_spacetime_varying_discretization_exp_0.pdf]

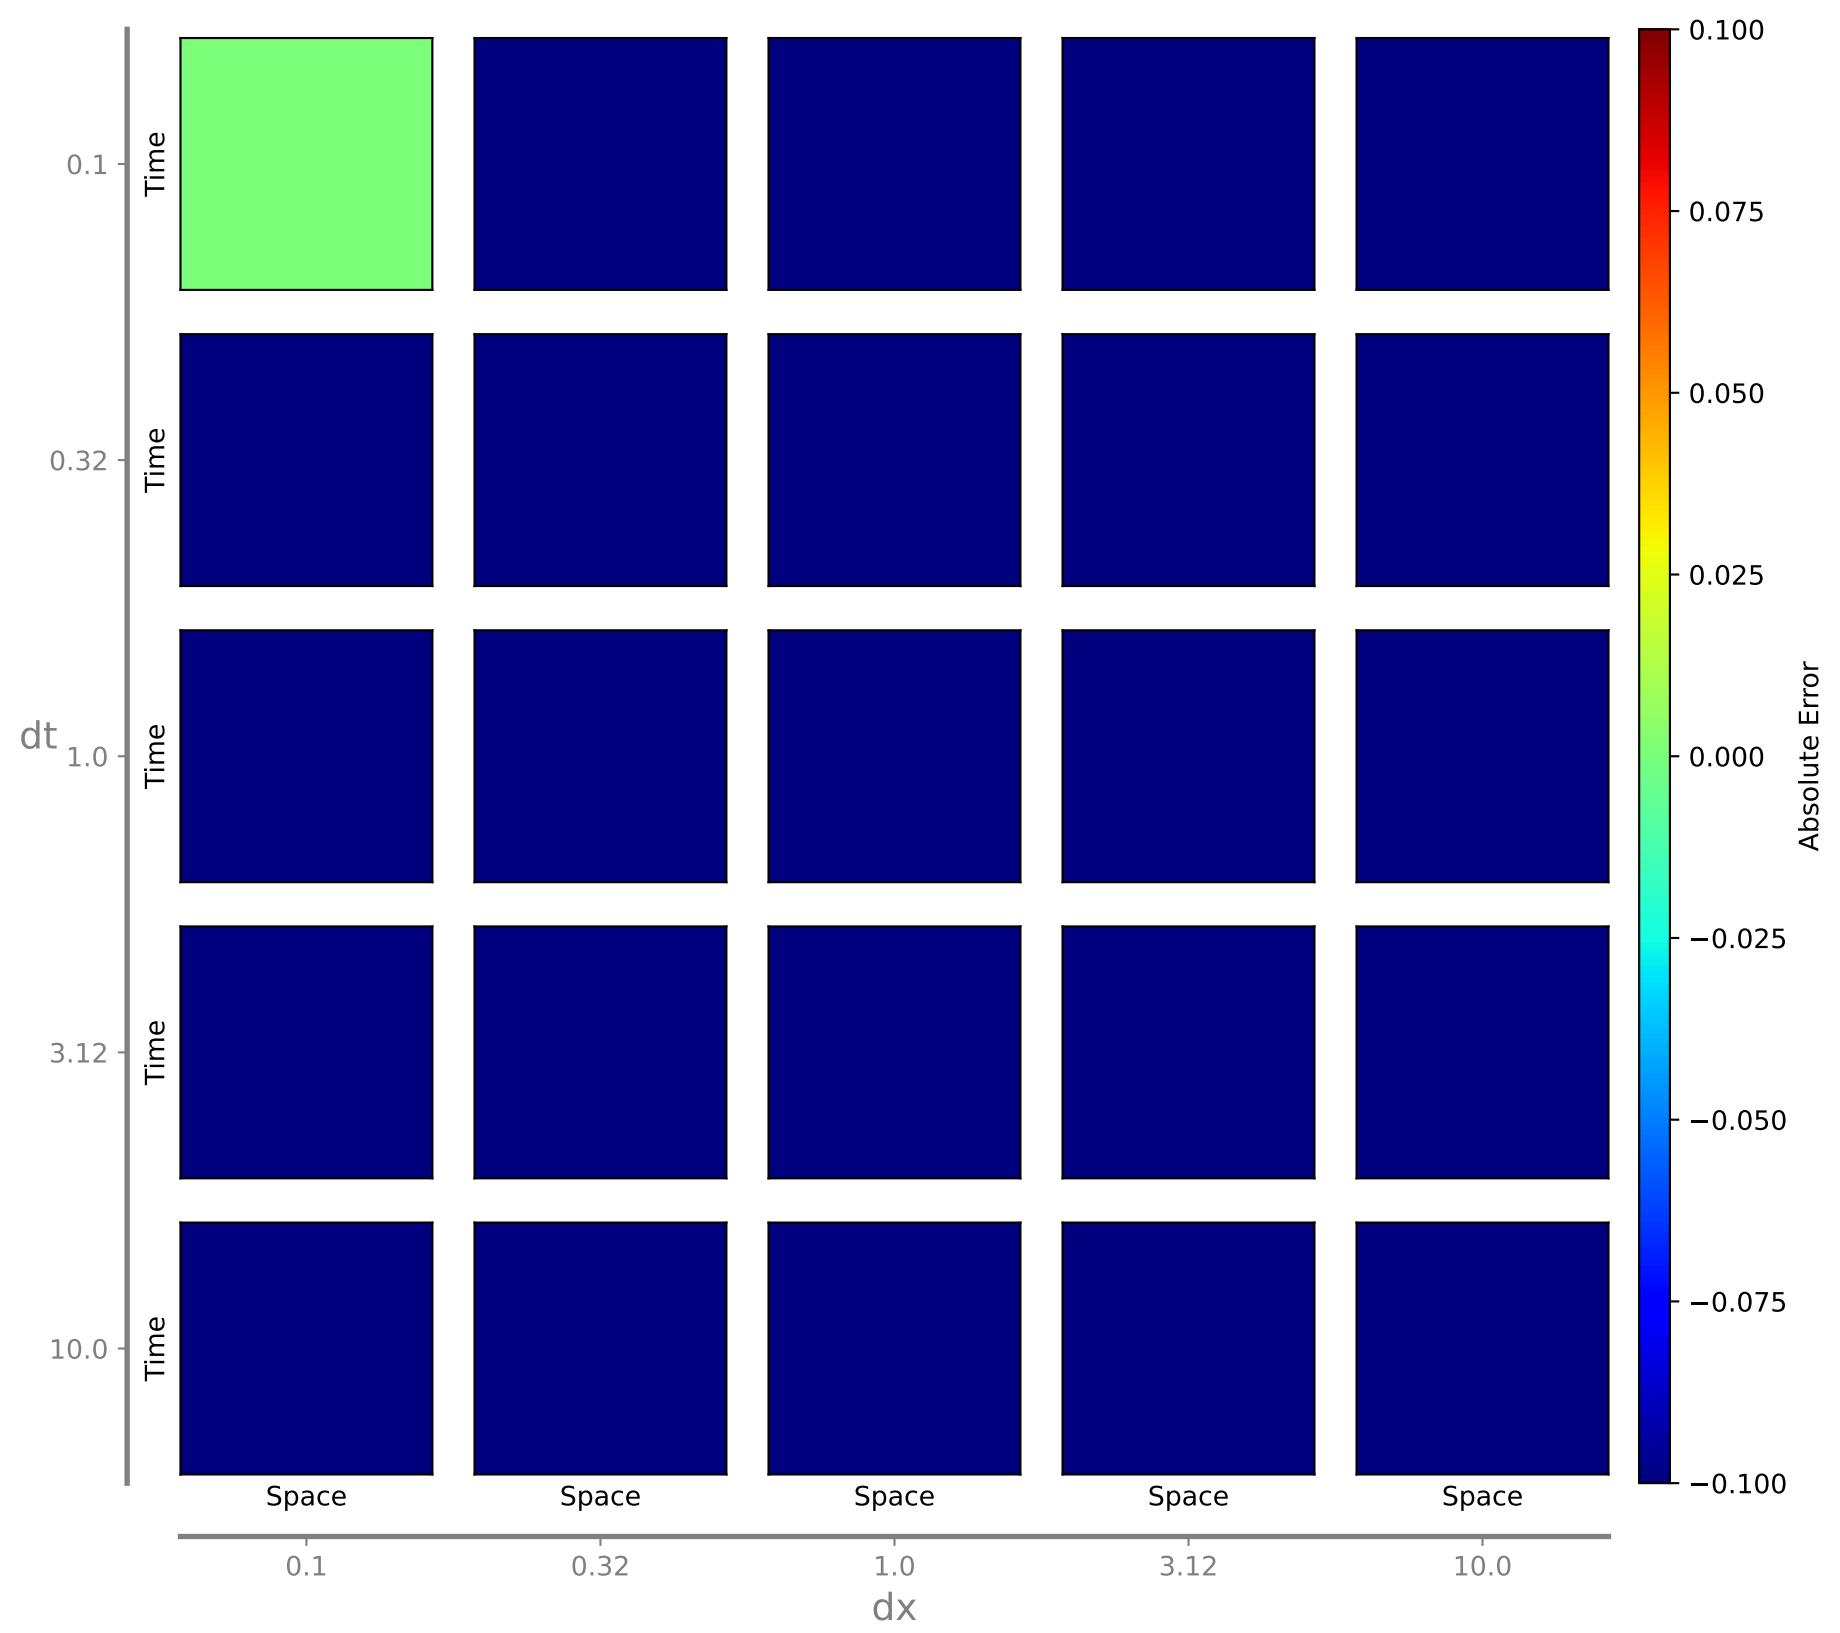

Supplement: supplementary_material [file analytical_result_spacetime_varying_discretization_exp_0_absolute_error.pdf › mega_mp_advection_on_metric_graphs/Results/Figures/analytical_result_spacetime_varying_discretization_exp_0_absolute_error.pdf]

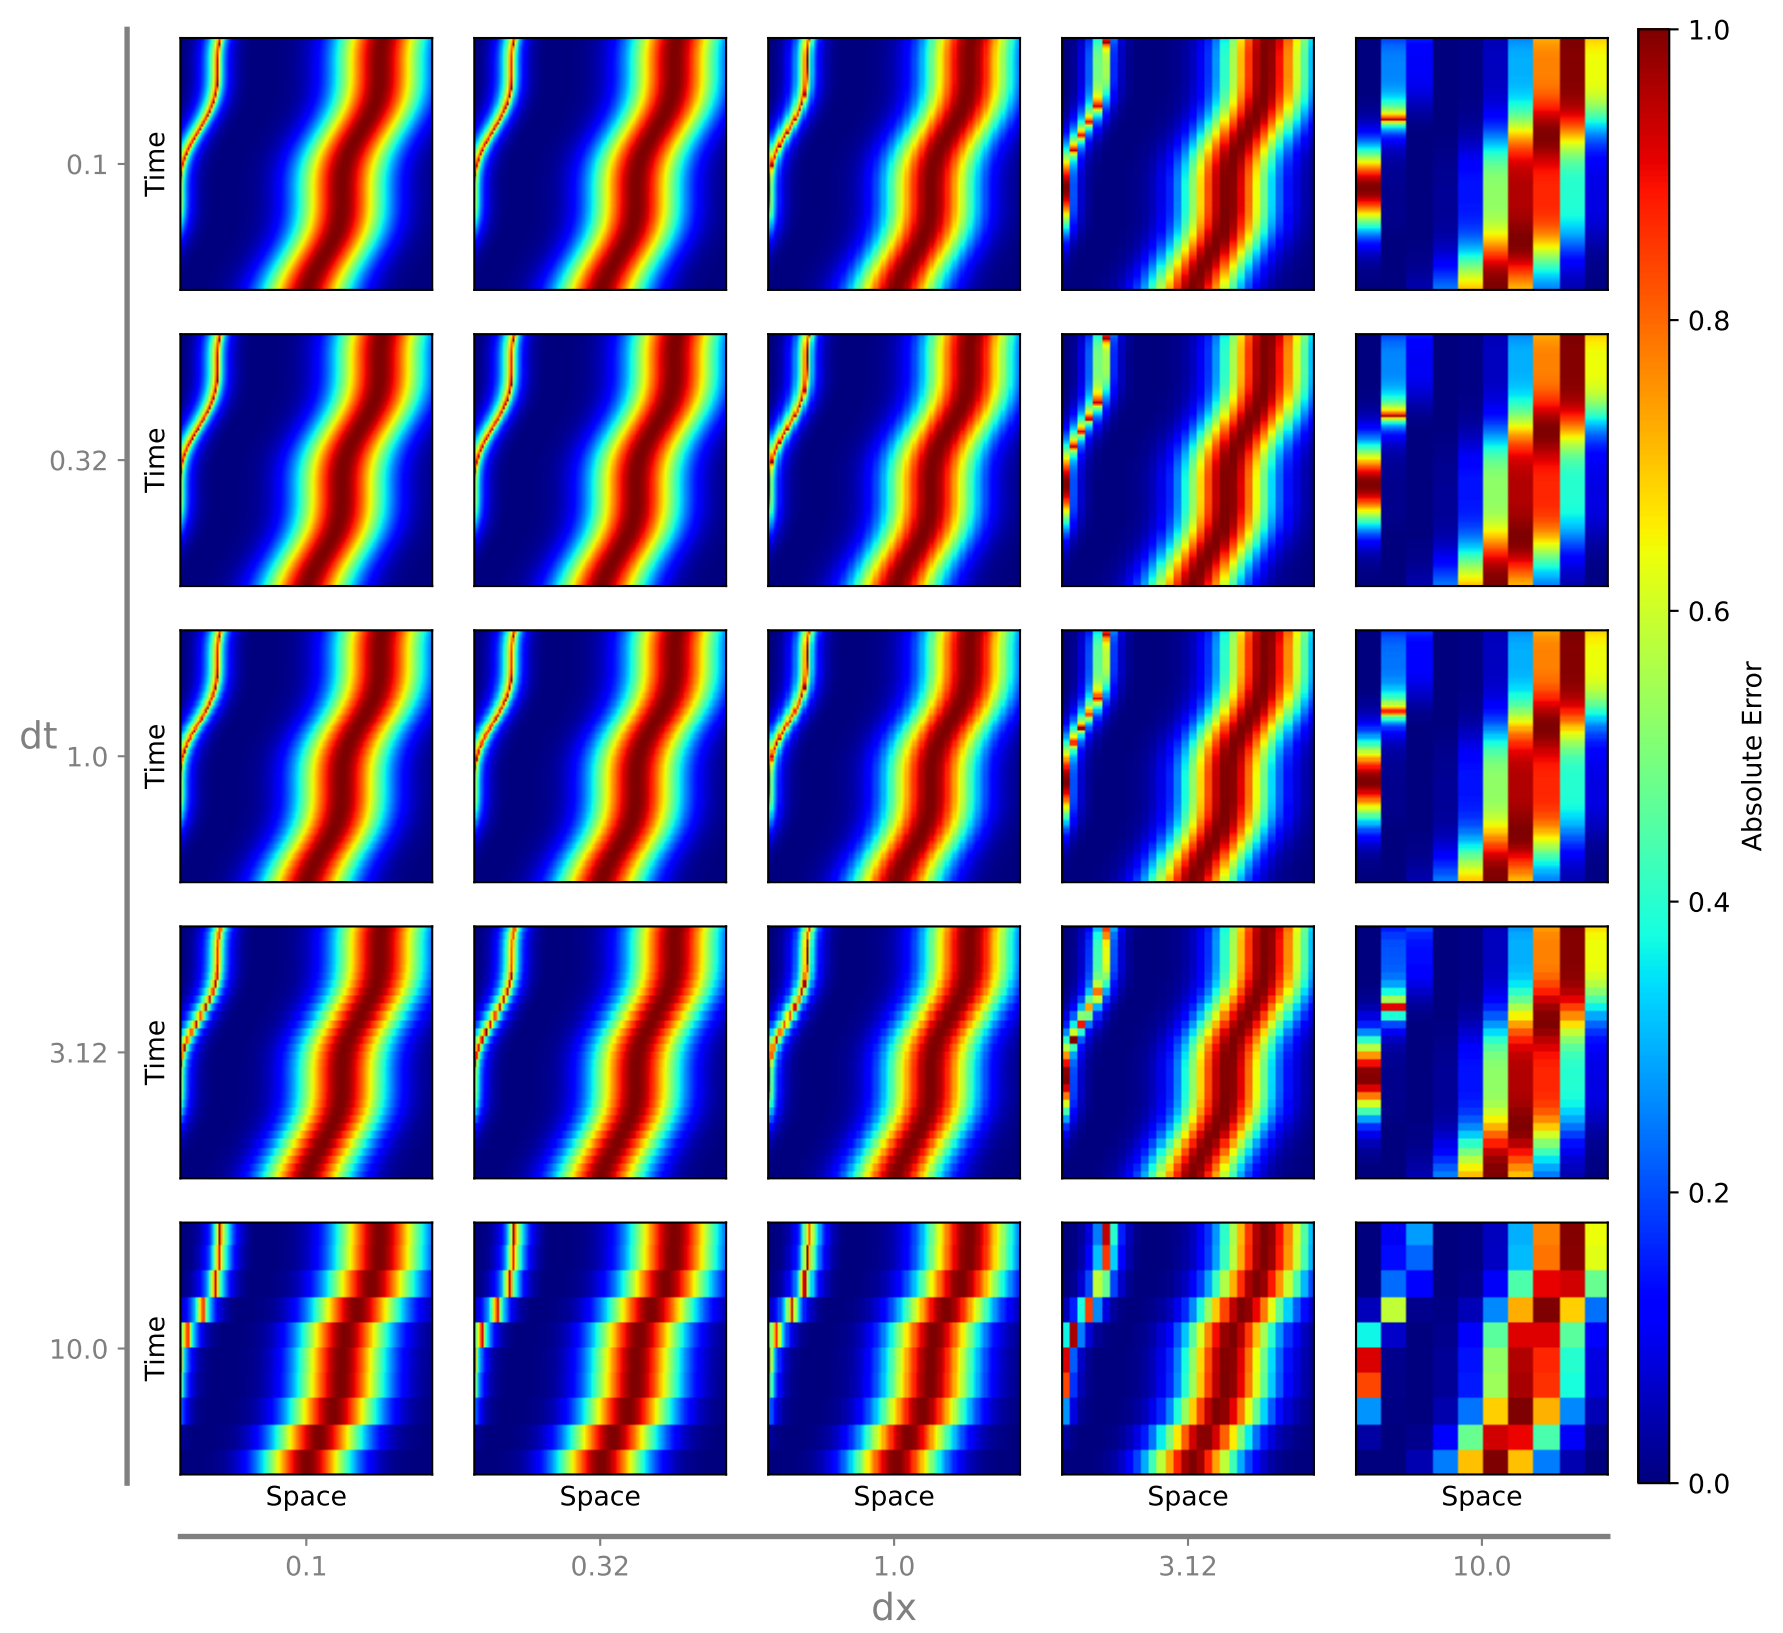

Supplement: supplementary_material [file analytical_result_spacetime_varying_discretization_exp_1.pdf › mega_mp_advection_on_metric_graphs/Results/Figures/analytical_result_spacetime_varying_discretization_exp_1.pdf]



Supplement: supplementary_material [file analytical_result_spacetime_varying_discretization_exp_1_absolute_error.pdf › mega_mp_advection_on_metric_graphs/Results/Figures/analytical_result_spacetime_varying_discretization_exp_1_absolute_error.pdf]

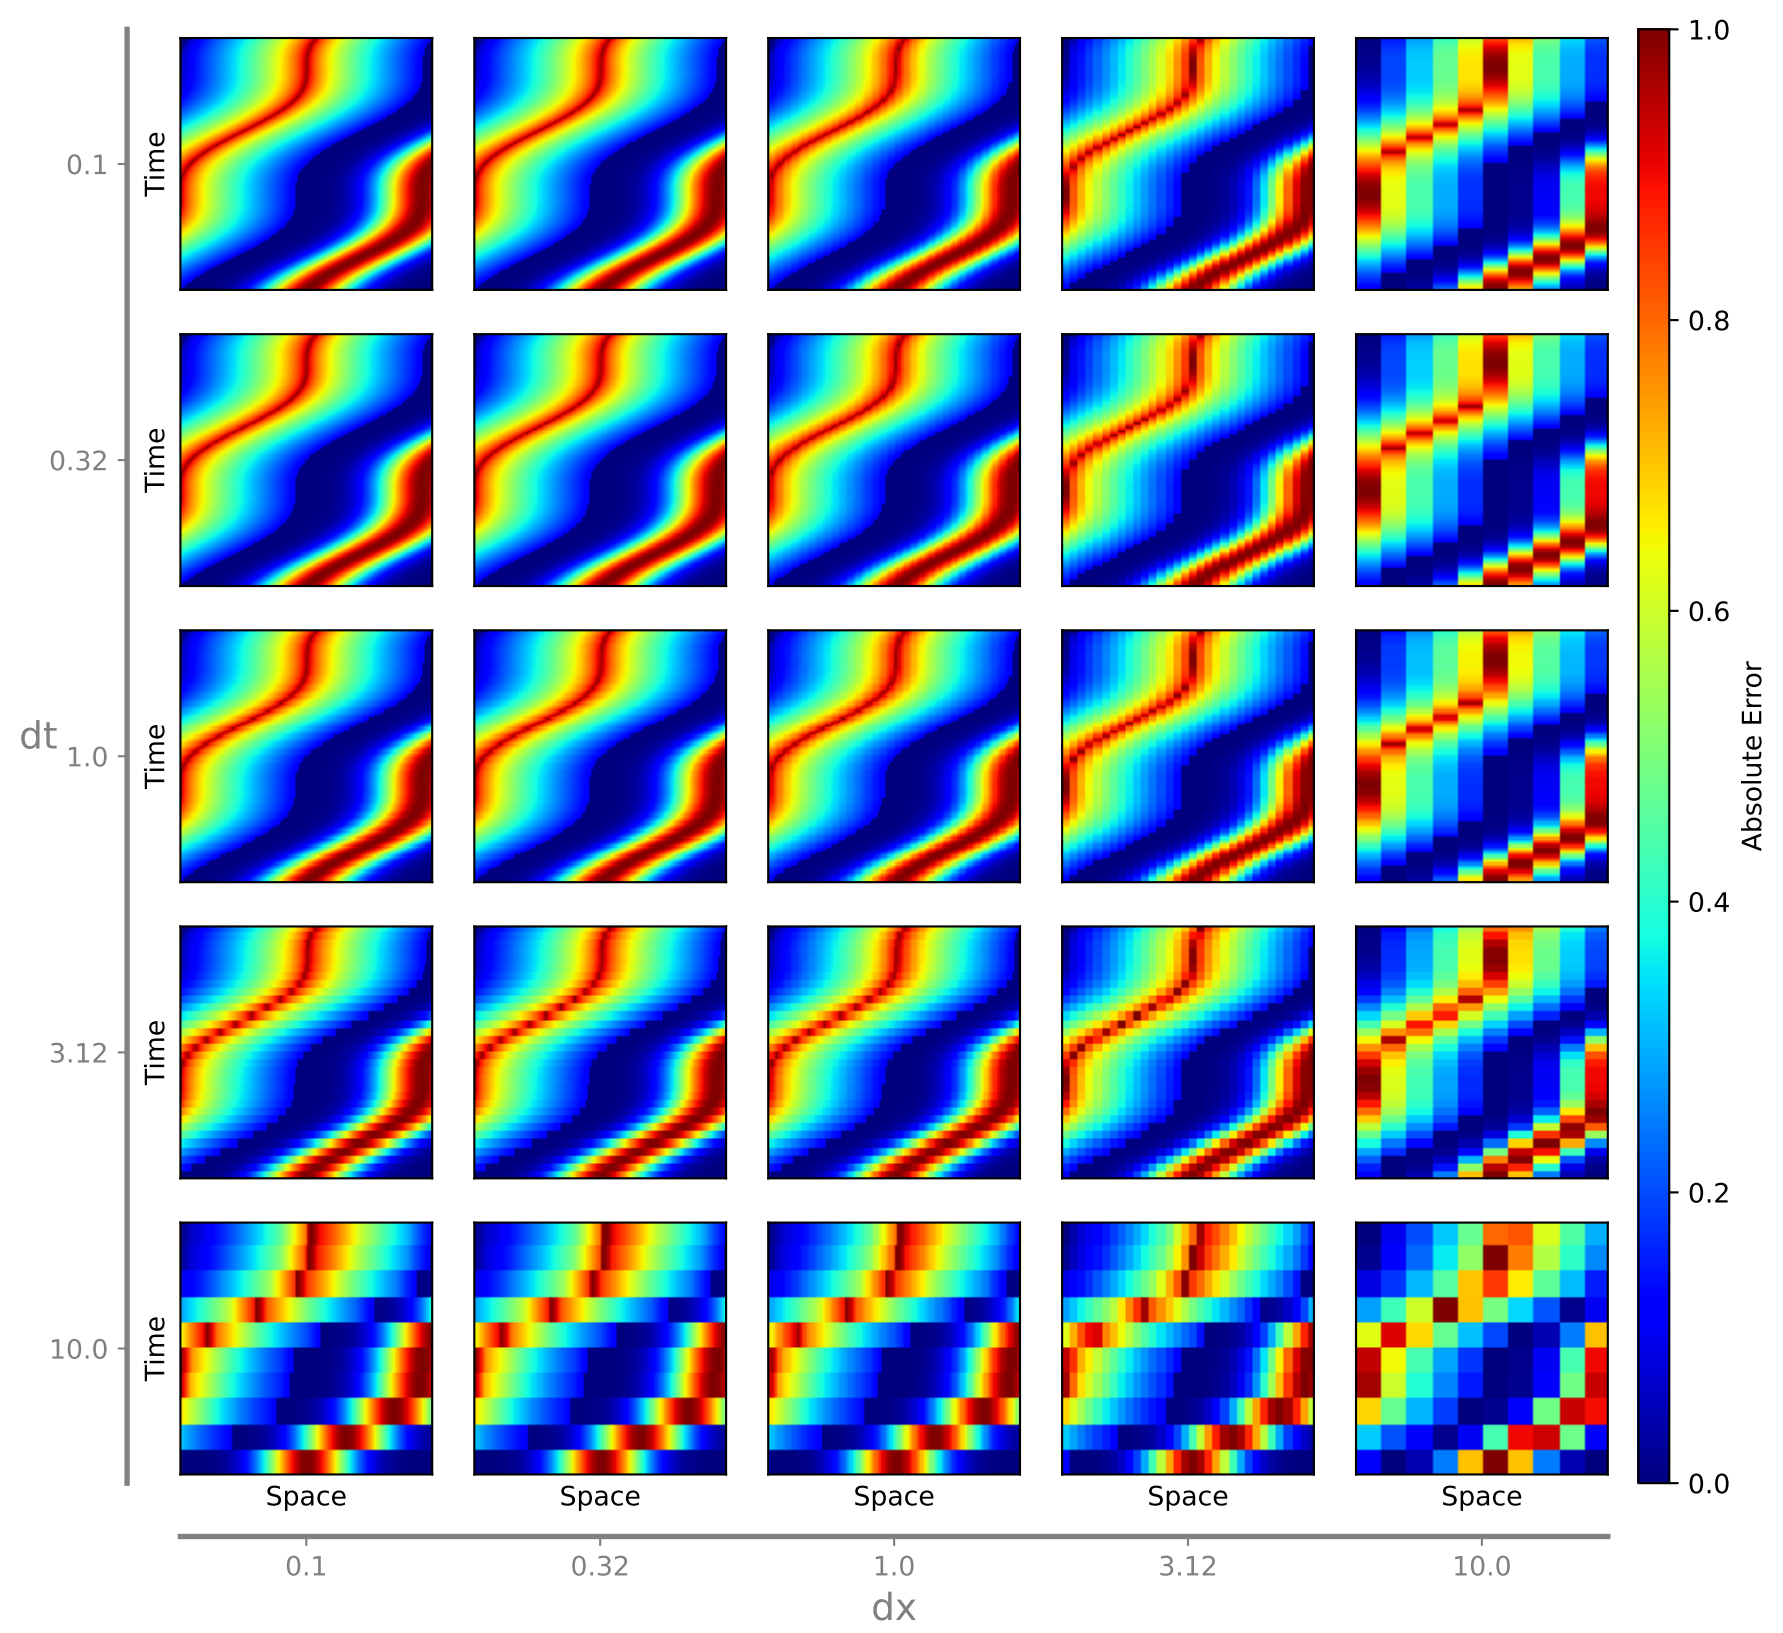

Supplement: supplementary_material [file analytical_result_spacetime_varying_discretization_exp_2.pdf › mega_mp_advection_on_metric_graphs/Results/Figures/analytical_result_spacetime_varying_discretization_exp_2.pdf]



Supplement: supplementary_material [file analytical_result_spacetime_varying_discretization_exp_2_absolute_error.pdf › mega_mp_advection_on_metric_graphs/Results/Figures/analytical_result_spacetime_varying_discretization_exp_2_absolute_error.pdf]

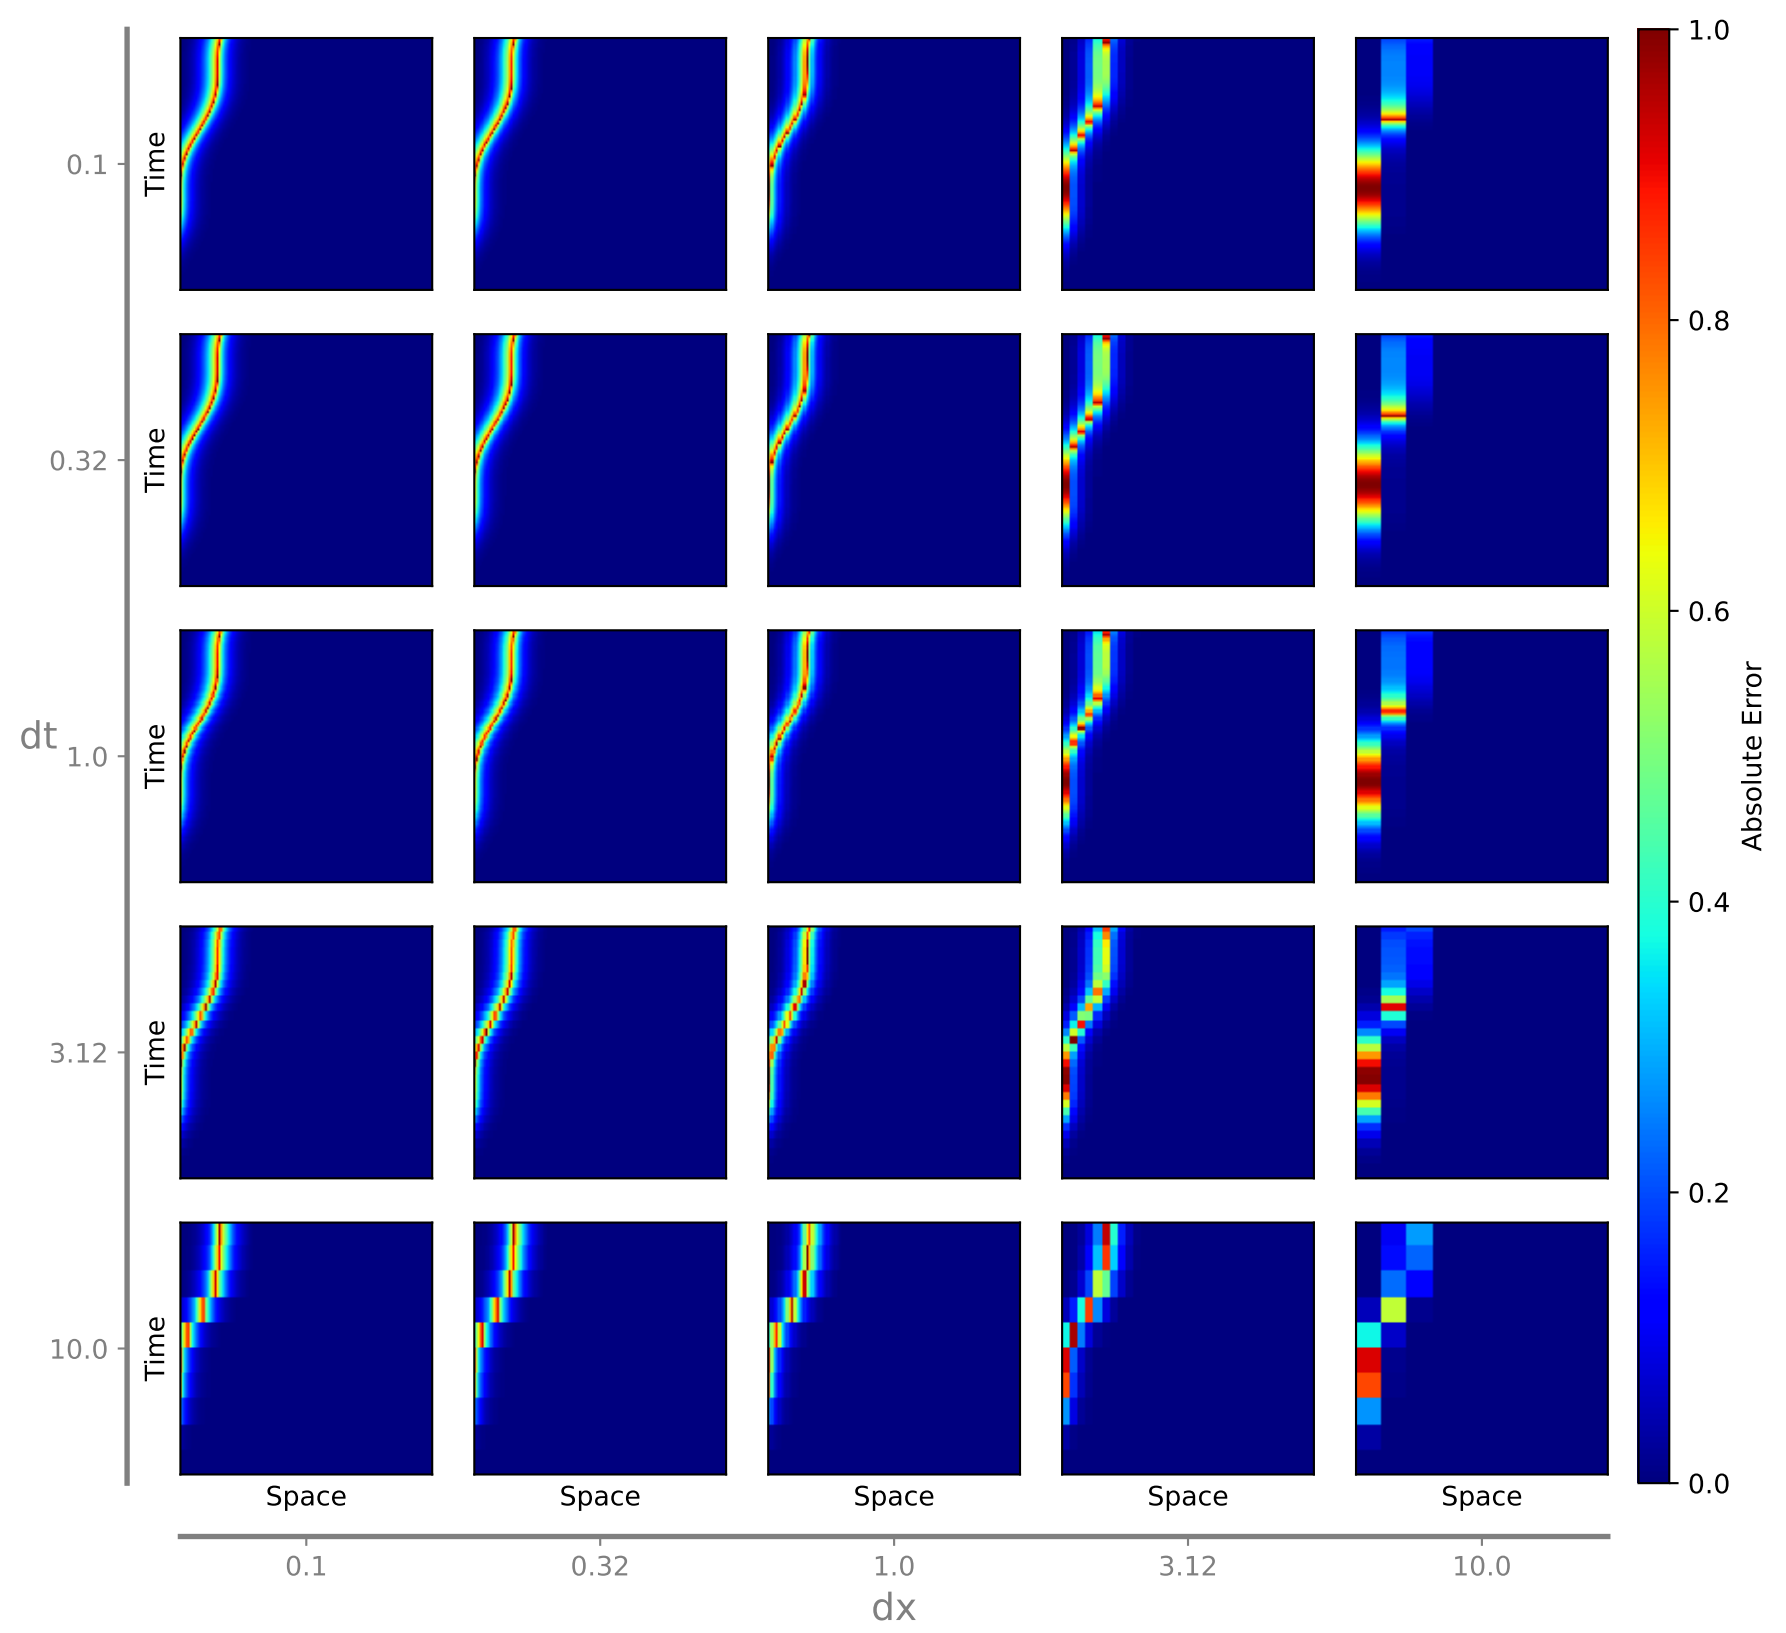

Supplement: supplementary_material [file analytical_result_spacetime_varying_discretization_exp_3.pdf › mega_mp_advection_on_metric_graphs/Results/Figures/analytical_result_spacetime_varying_discretization_exp_3.pdf]



Supplement: supplementary_material [file analytical_result_spacetime_varying_discretization_exp_3_absolute_error.pdf › mega_mp_advection_on_metric_graphs/Results/Figures/analytical_result_spacetime_varying_discretization_exp_3_absolute_error.pdf]

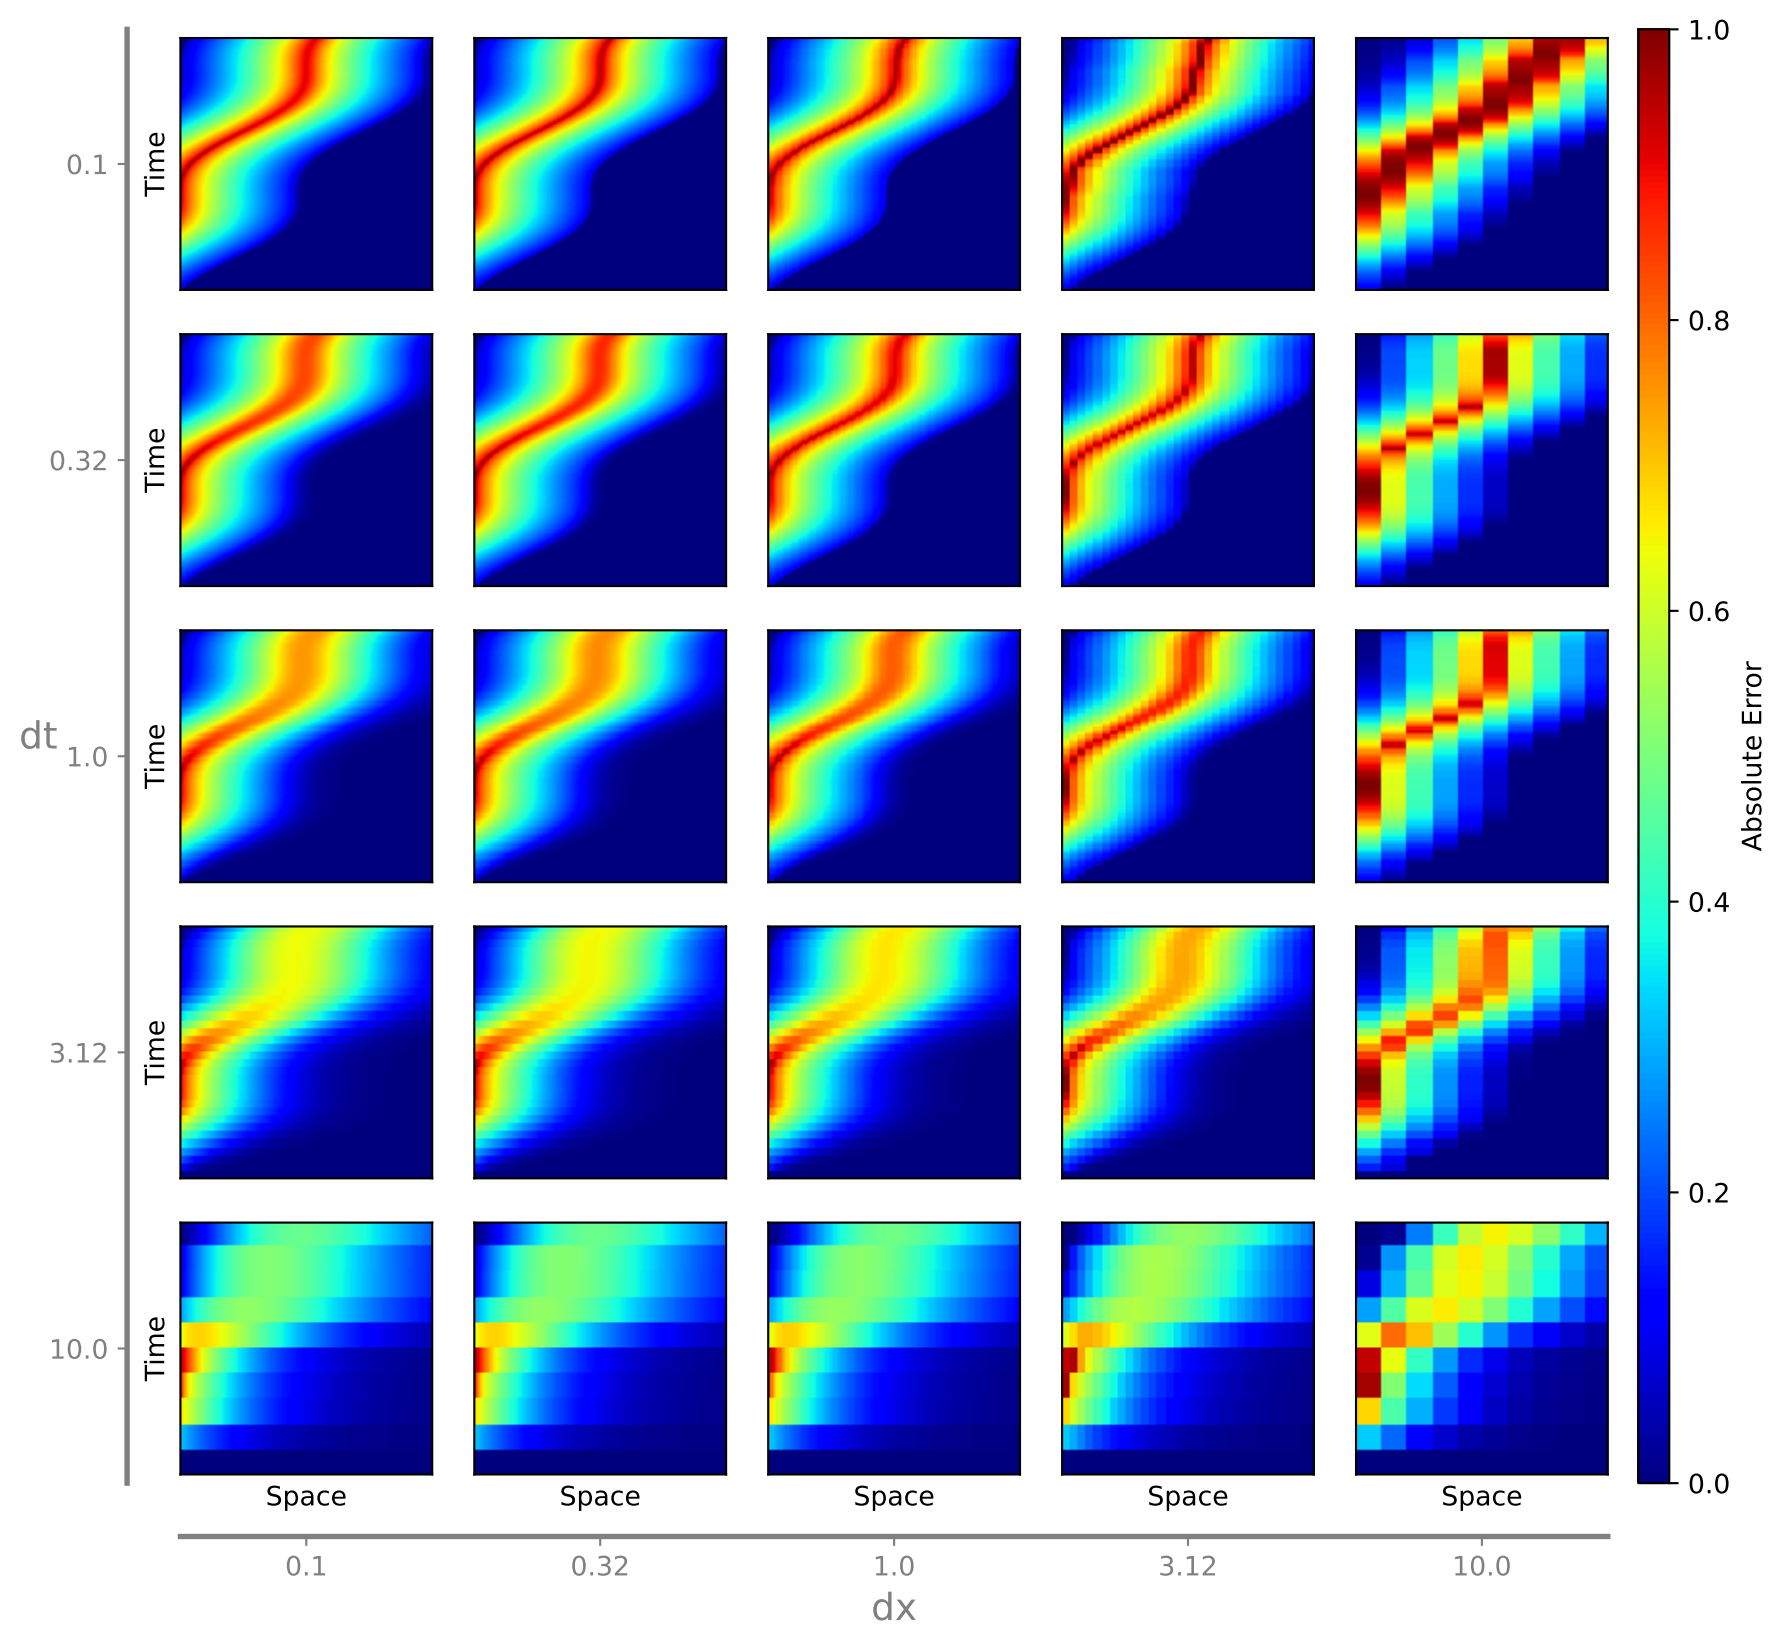

Supplement: supplementary_material [file mpnn_result_spacetime_varying_discretization_exp_0.pdf › mega_mp_advection_on_metric_graphs/Results/Figures/mpnn_result_spacetime_varying_discretization_exp_0.pdf]

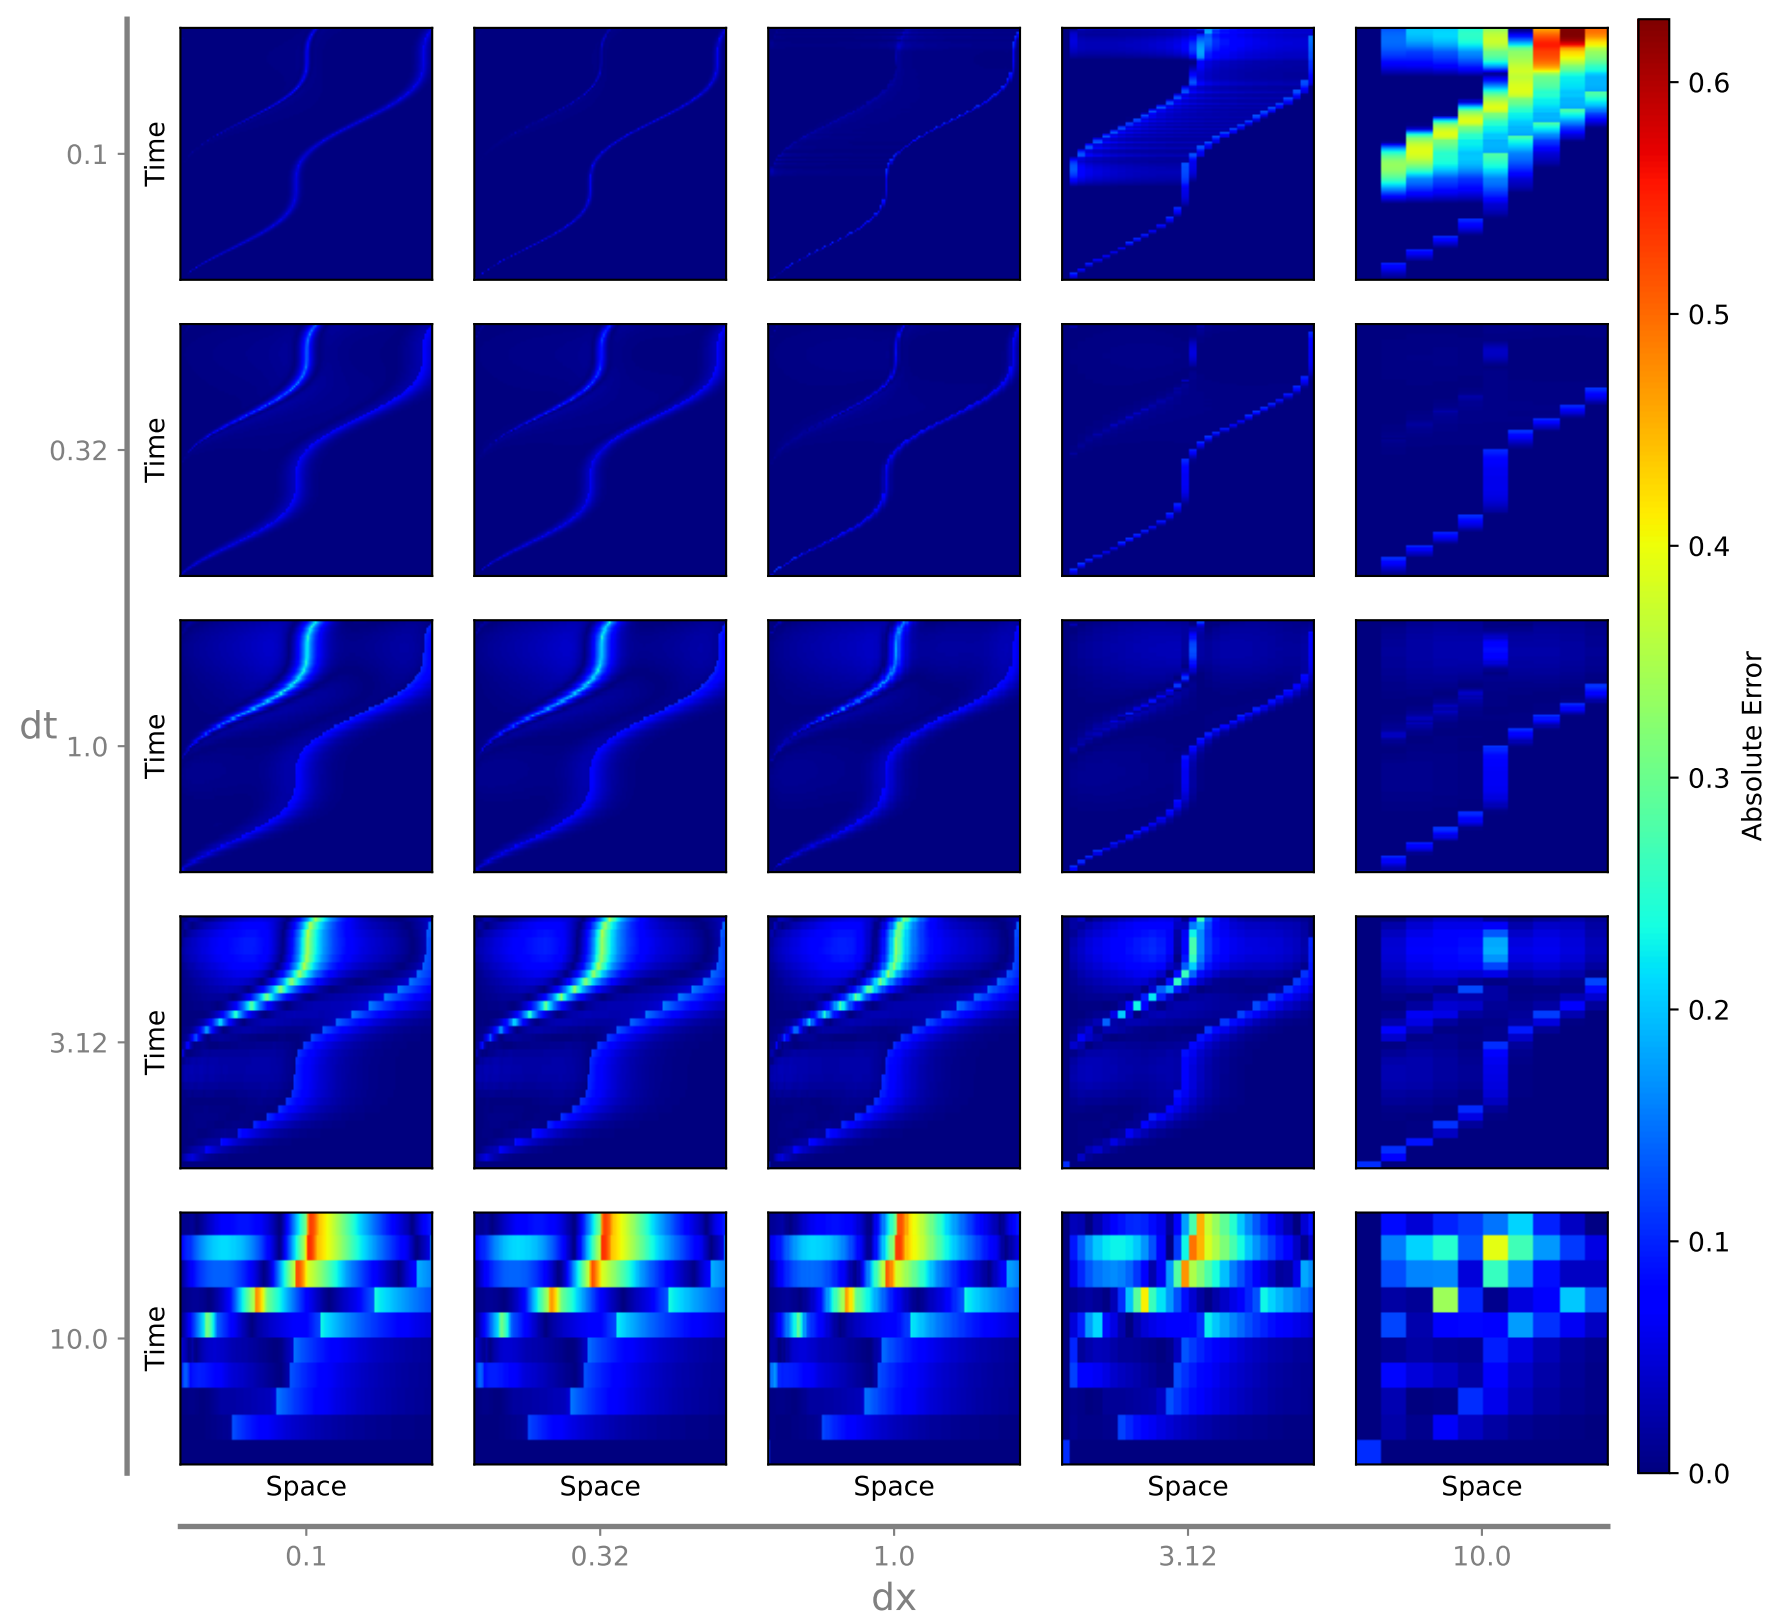

Supplement: supplementary_material [file mpnn_result_spacetime_varying_discretization_exp_0_absolute_error.pdf › mega_mp_advection_on_metric_graphs/Results/Figures/mpnn_result_spacetime_varying_discretization_exp_0_absolute_error.pdf]

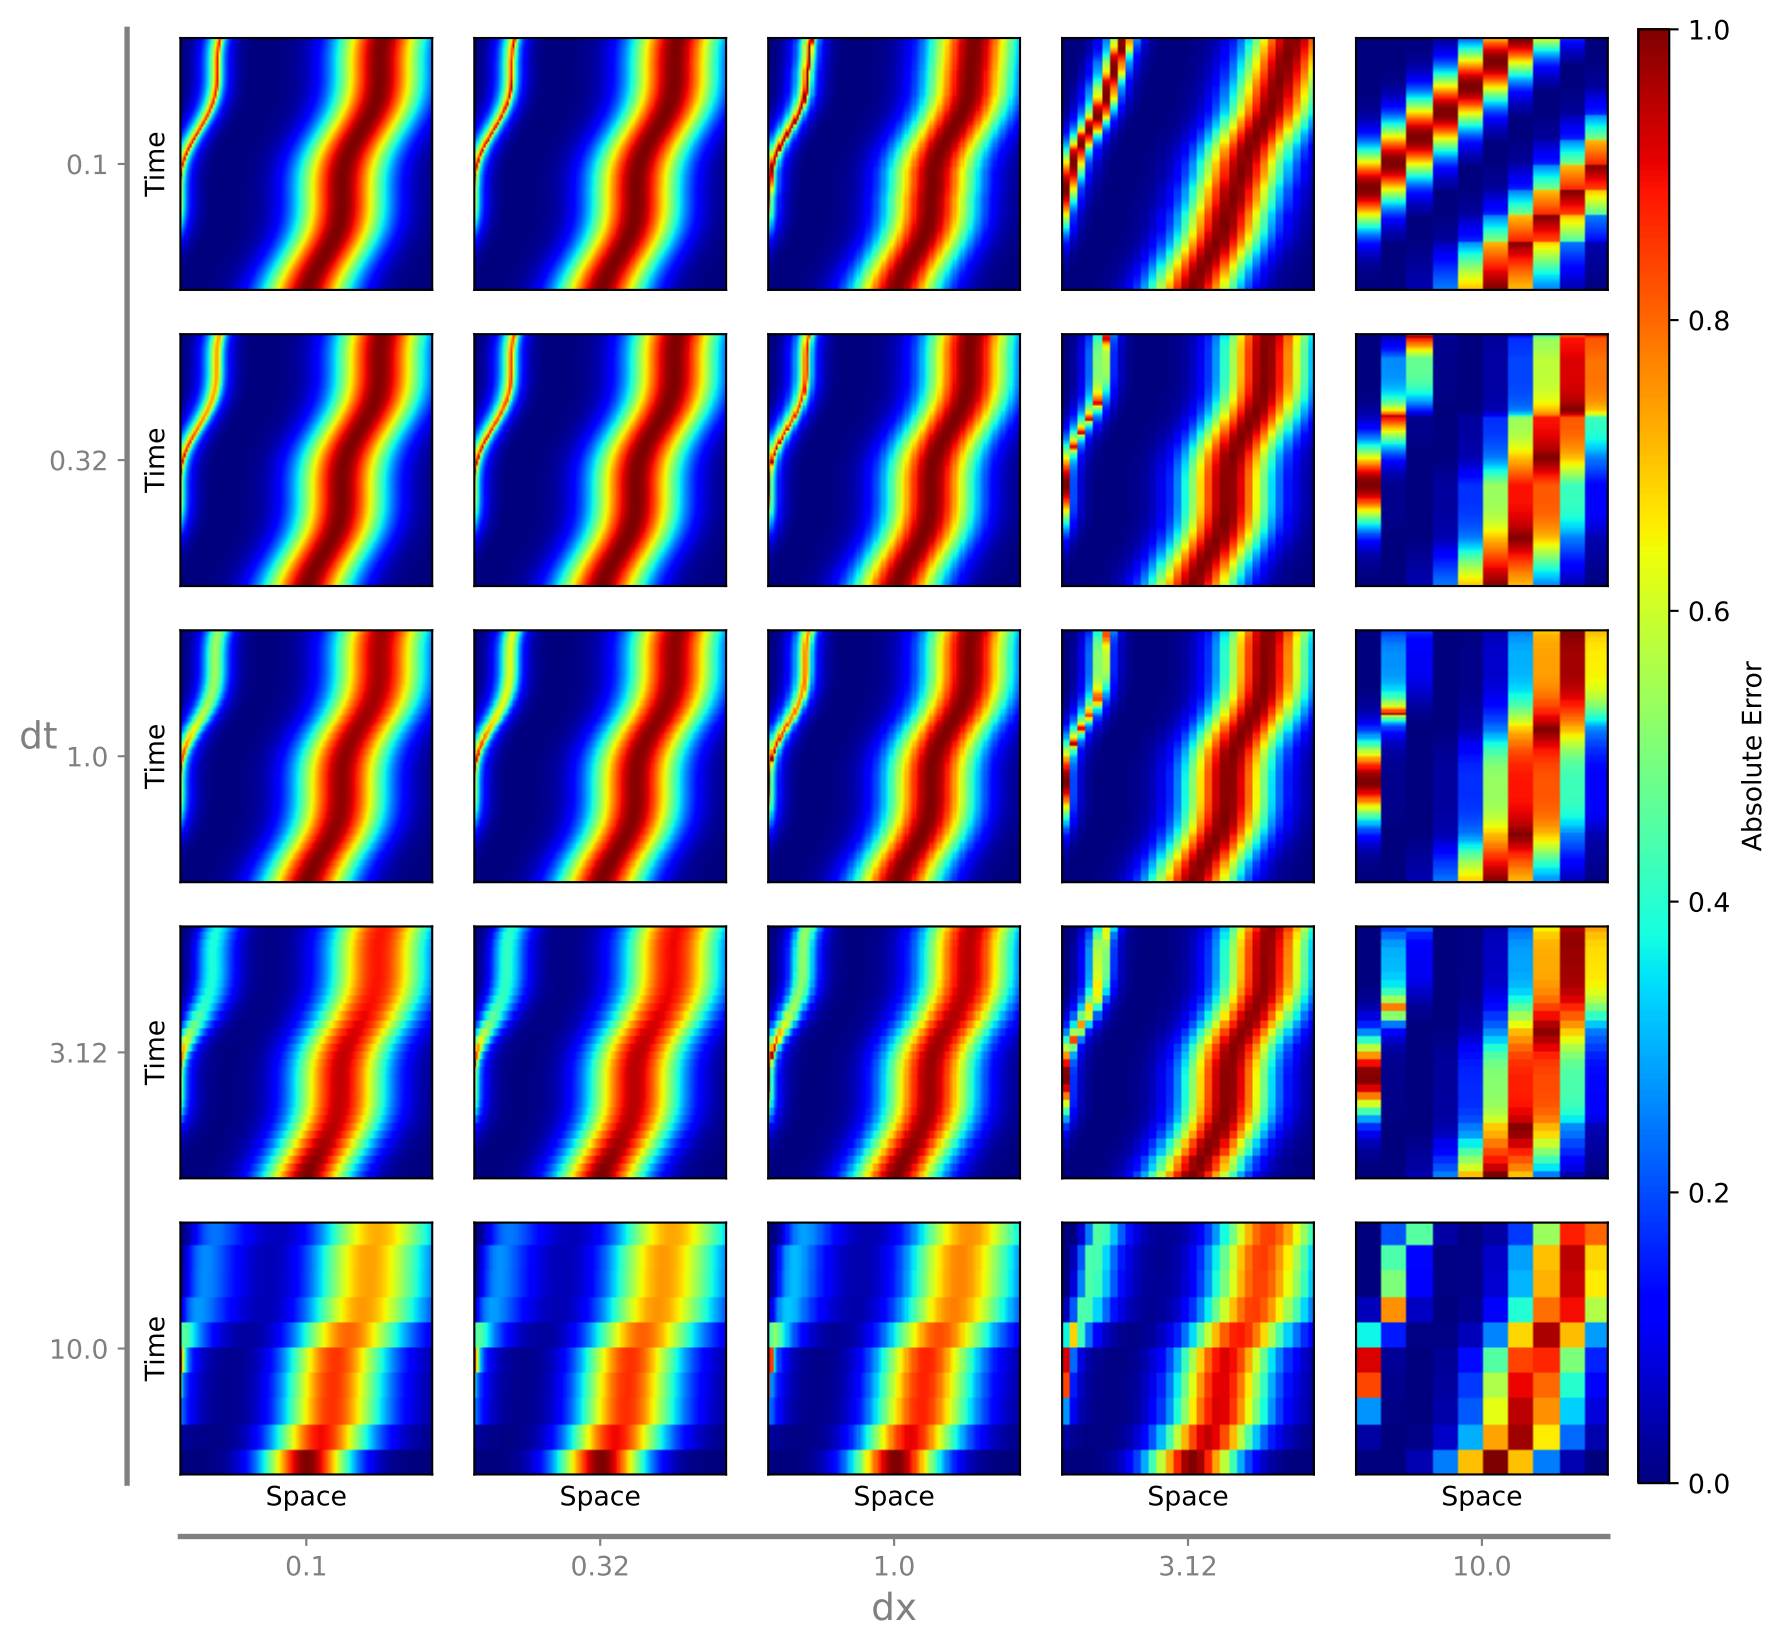

Supplement: supplementary_material [file mpnn_result_spacetime_varying_discretization_exp_1.pdf › mega_mp_advection_on_metric_graphs/Results/Figures/mpnn_result_spacetime_varying_discretization_exp_1.pdf]

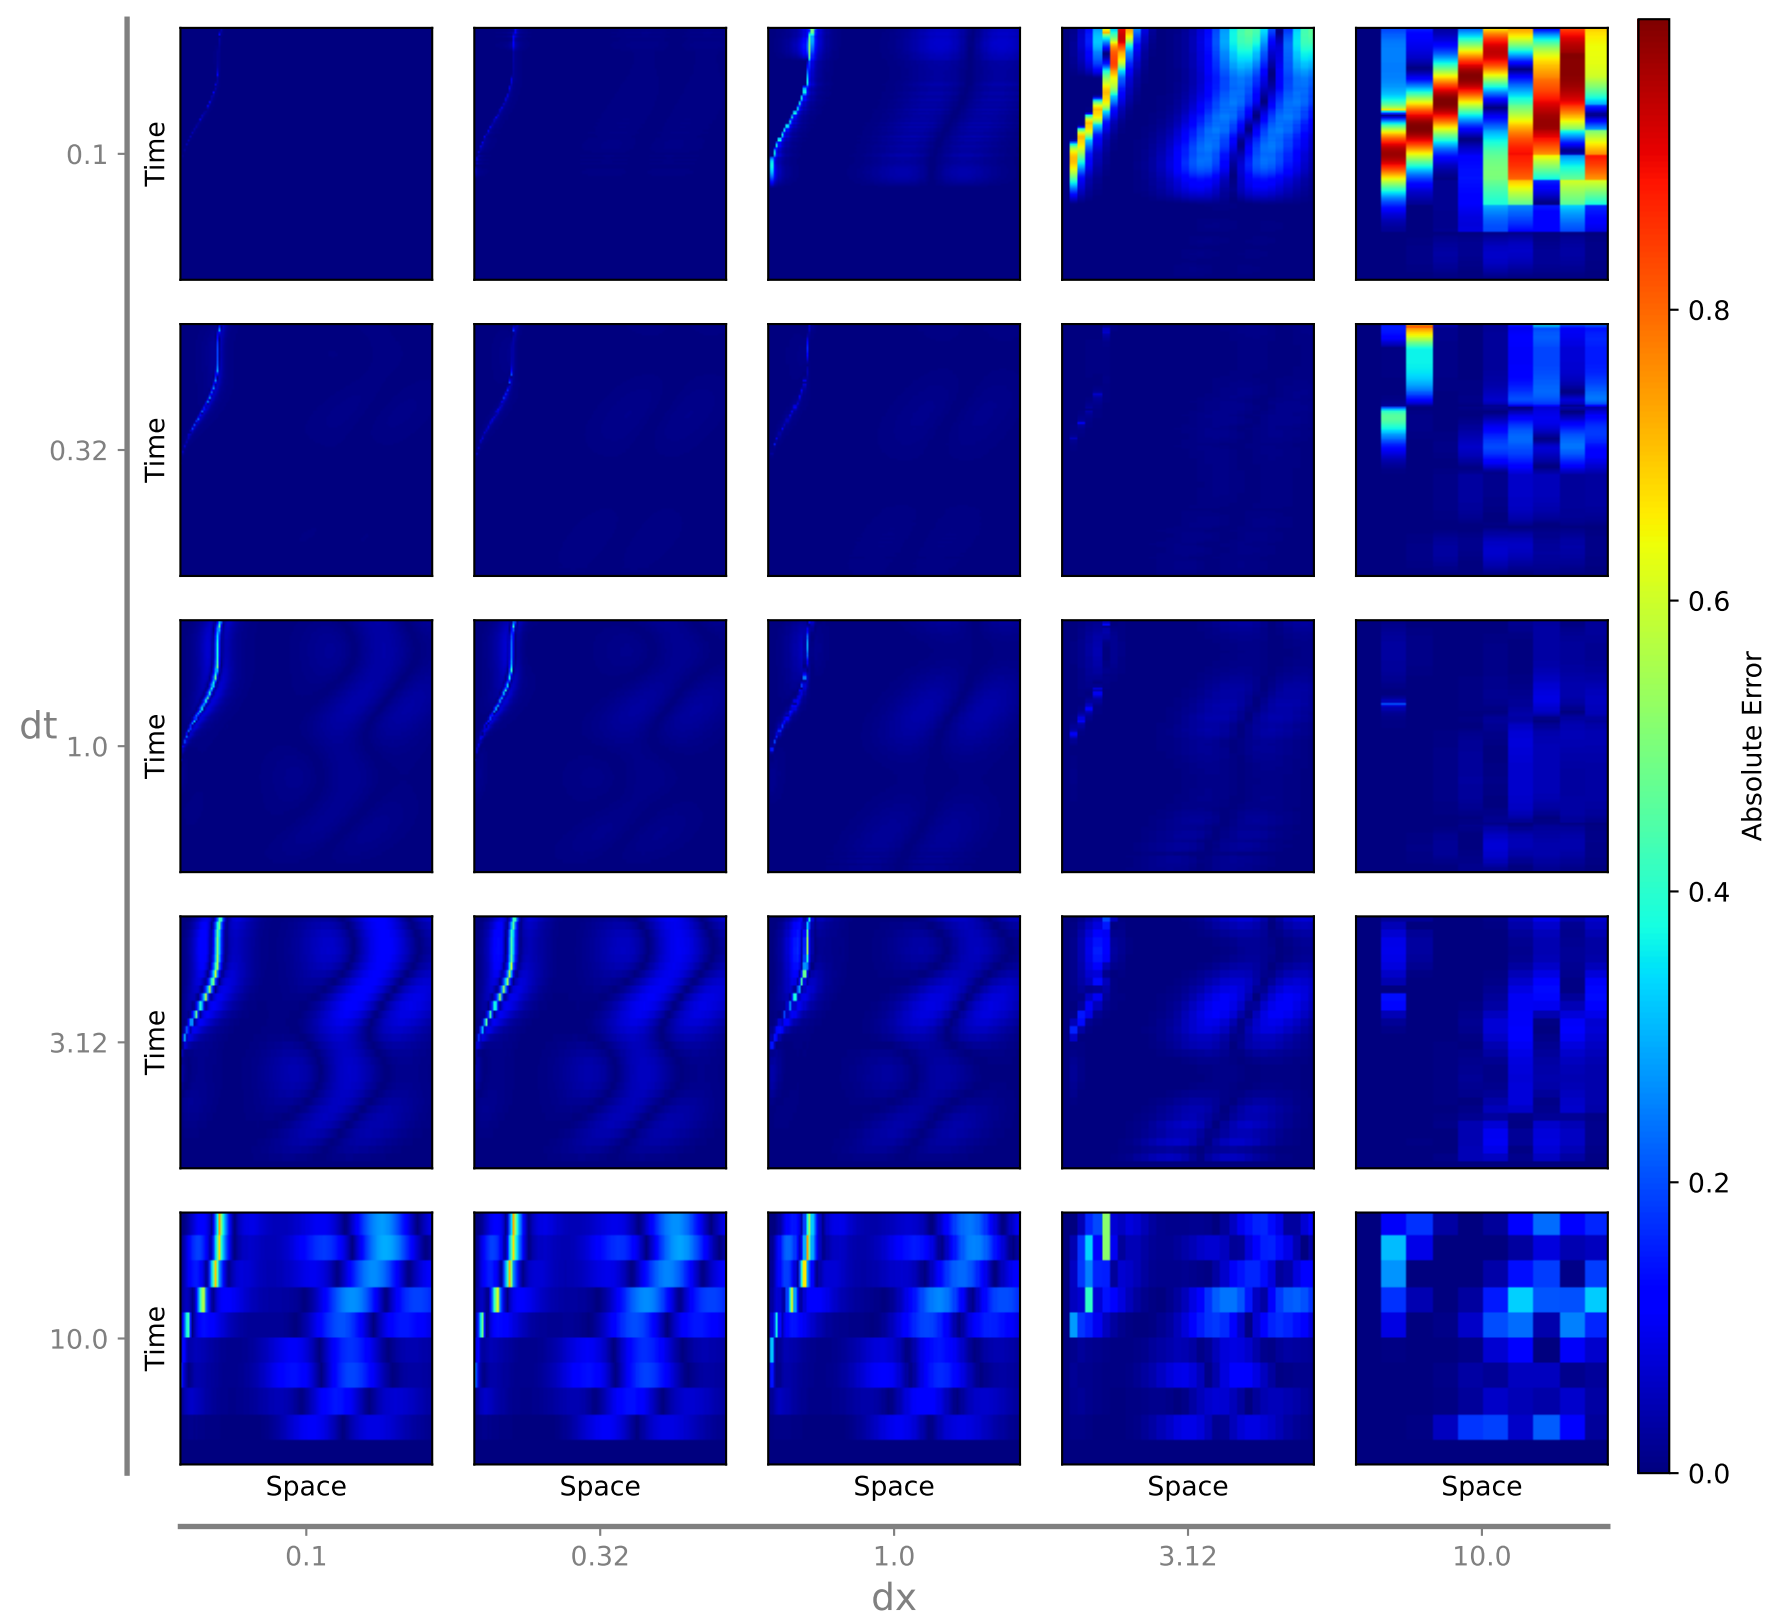

Supplement: supplementary_material [file mpnn_result_spacetime_varying_discretization_exp_1_absolute_error.pdf › mega_mp_advection_on_metric_graphs/Results/Figures/mpnn_result_spacetime_varying_discretization_exp_1_absolute_error.pdf]

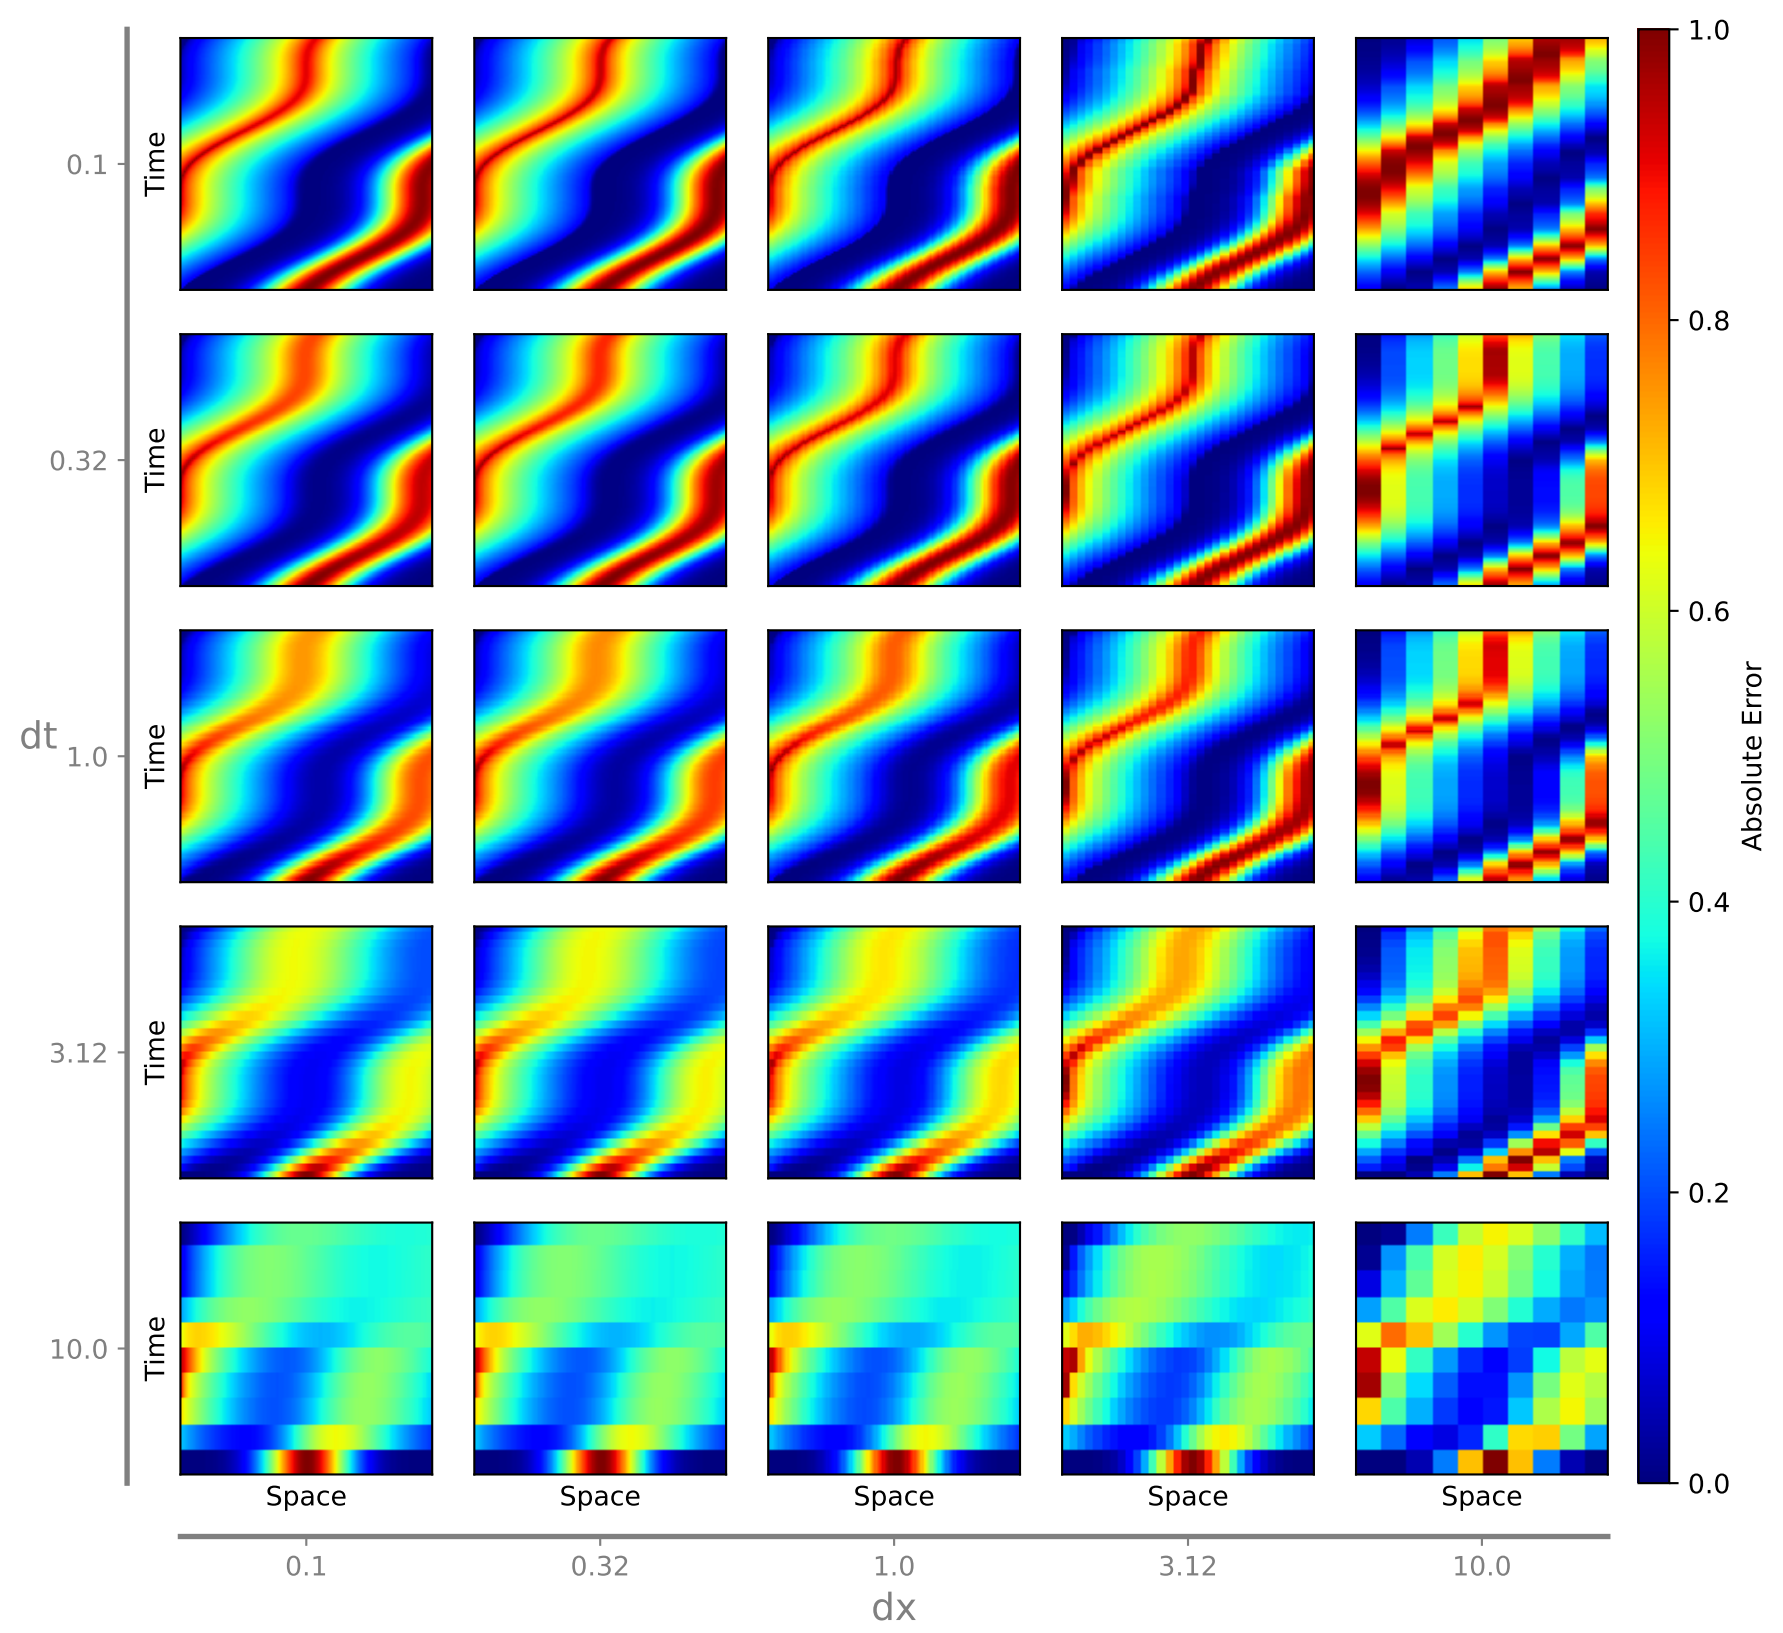

Supplement: supplementary_material [file mpnn_result_spacetime_varying_discretization_exp_2.pdf › mega_mp_advection_on_metric_graphs/Results/Figures/mpnn_result_spacetime_varying_discretization_exp_2.pdf]

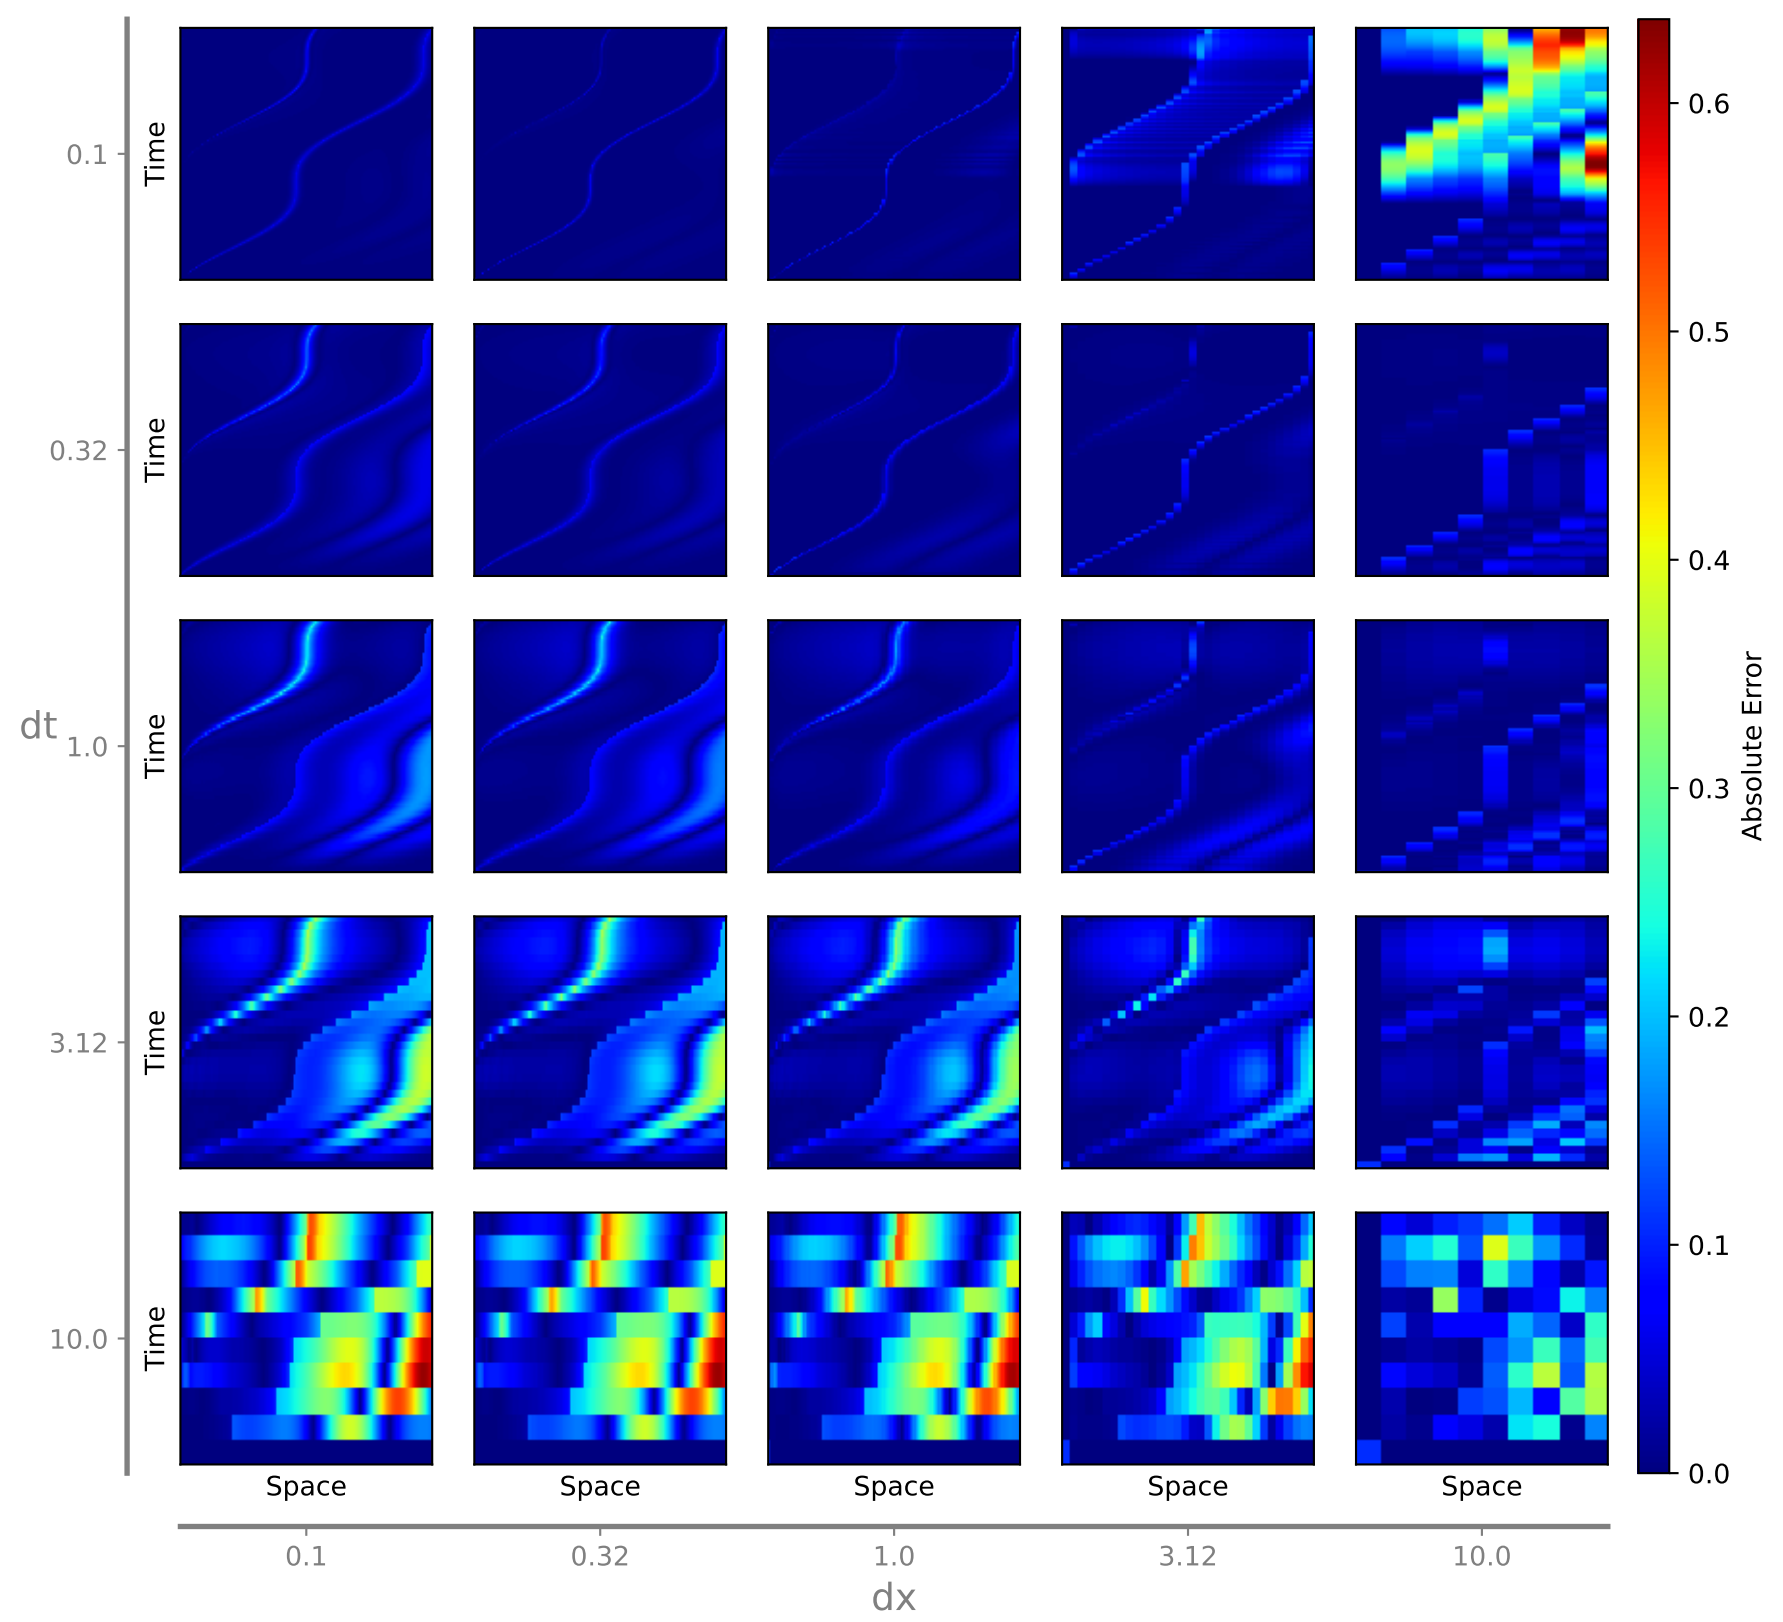

Supplement: supplementary_material [file mpnn_result_spacetime_varying_discretization_exp_2_absolute_error.pdf › mega_mp_advection_on_metric_graphs/Results/Figures/mpnn_result_spacetime_varying_discretization_exp_2_absolute_error.pdf]

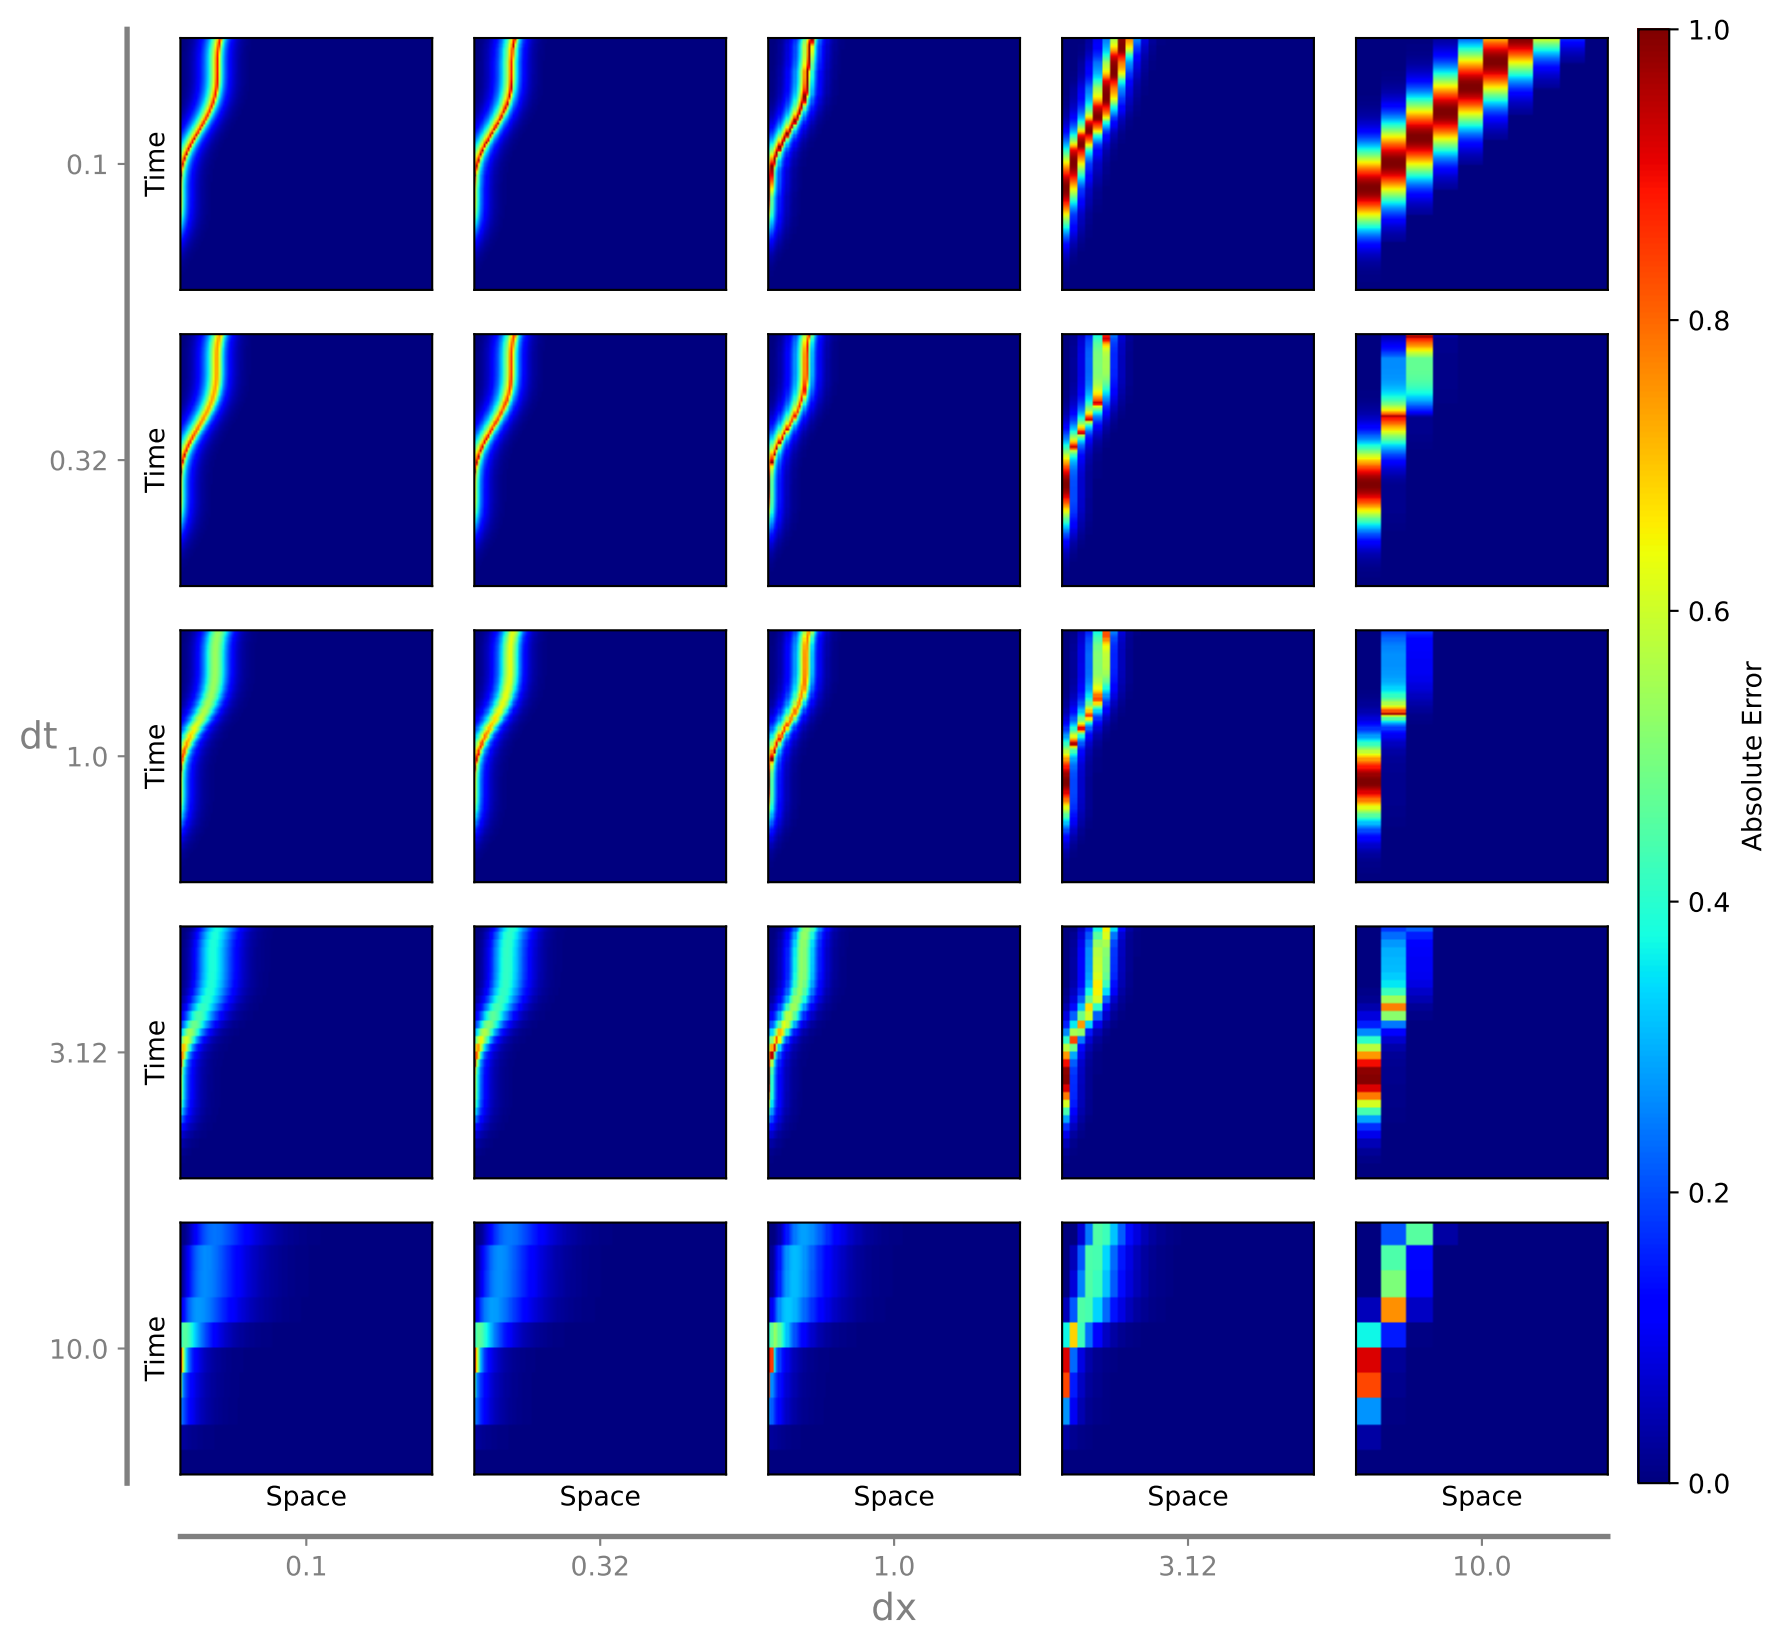

Supplement: supplementary_material [file mpnn_result_spacetime_varying_discretization_exp_3.pdf › mega_mp_advection_on_metric_graphs/Results/Figures/mpnn_result_spacetime_varying_discretization_exp_3.pdf]

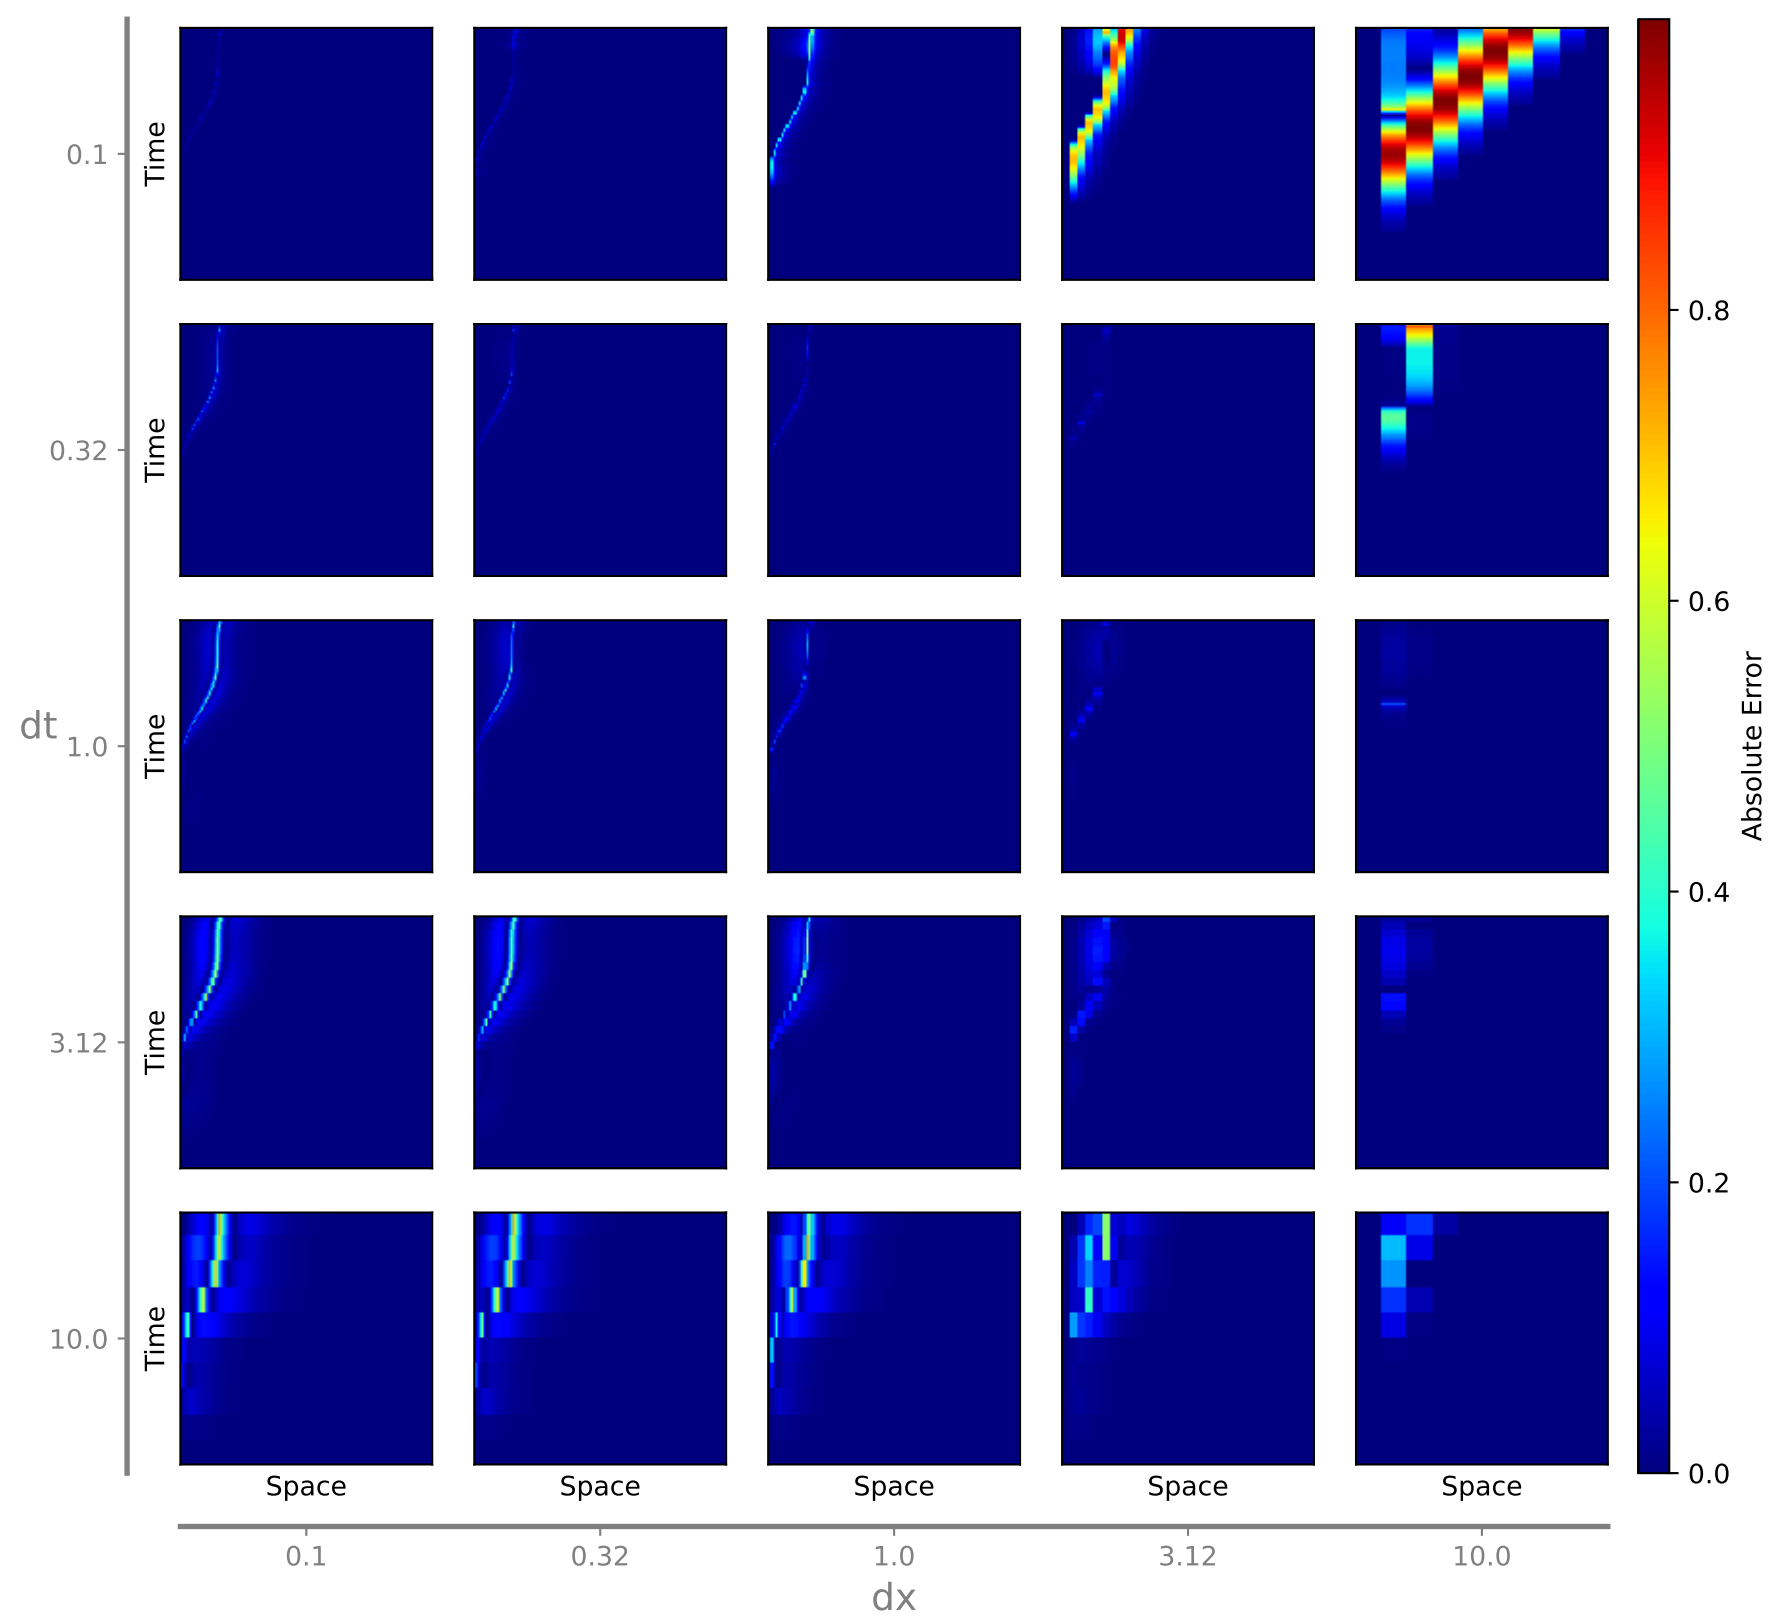

Supplement: supplementary_material [file mpnn_result_spacetime_varying_discretization_exp_3_absolute_error.pdf › mega_mp_advection_on_metric_graphs/Results/Figures/mpnn_result_spacetime_varying_discretization_exp_3_absolute_error.pdf]

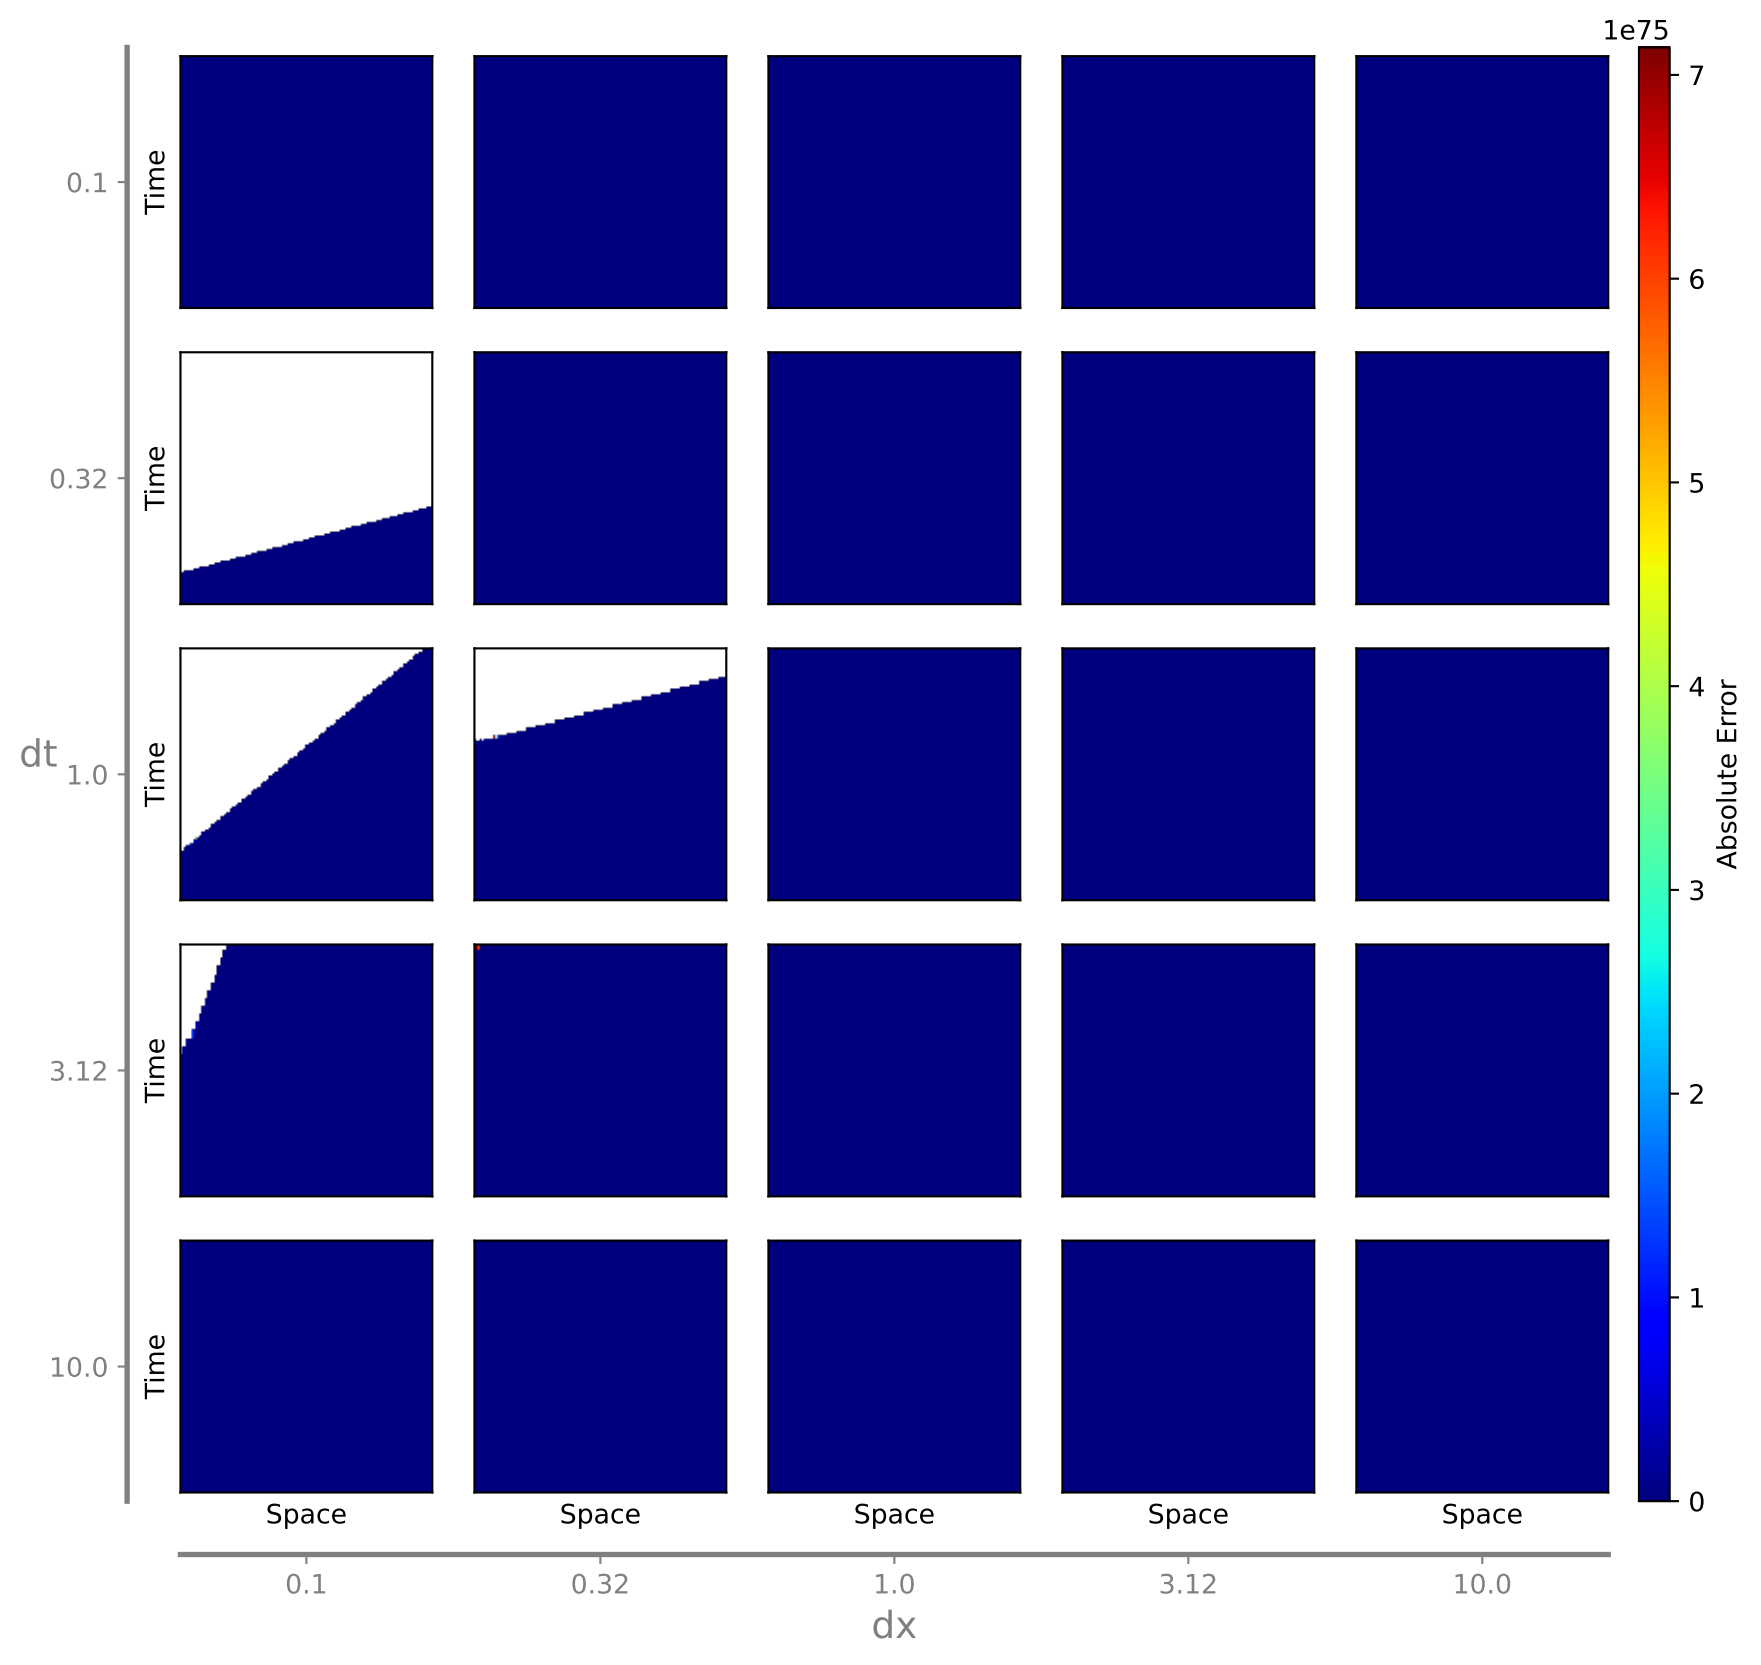

Supplement: supplementary_material [file rk4_result_spacetime_varying_discretization_exp_0.pdf › mega_mp_advection_on_metric_graphs/Results/Figures/rk4_result_spacetime_varying_discretization_exp_0.pdf]

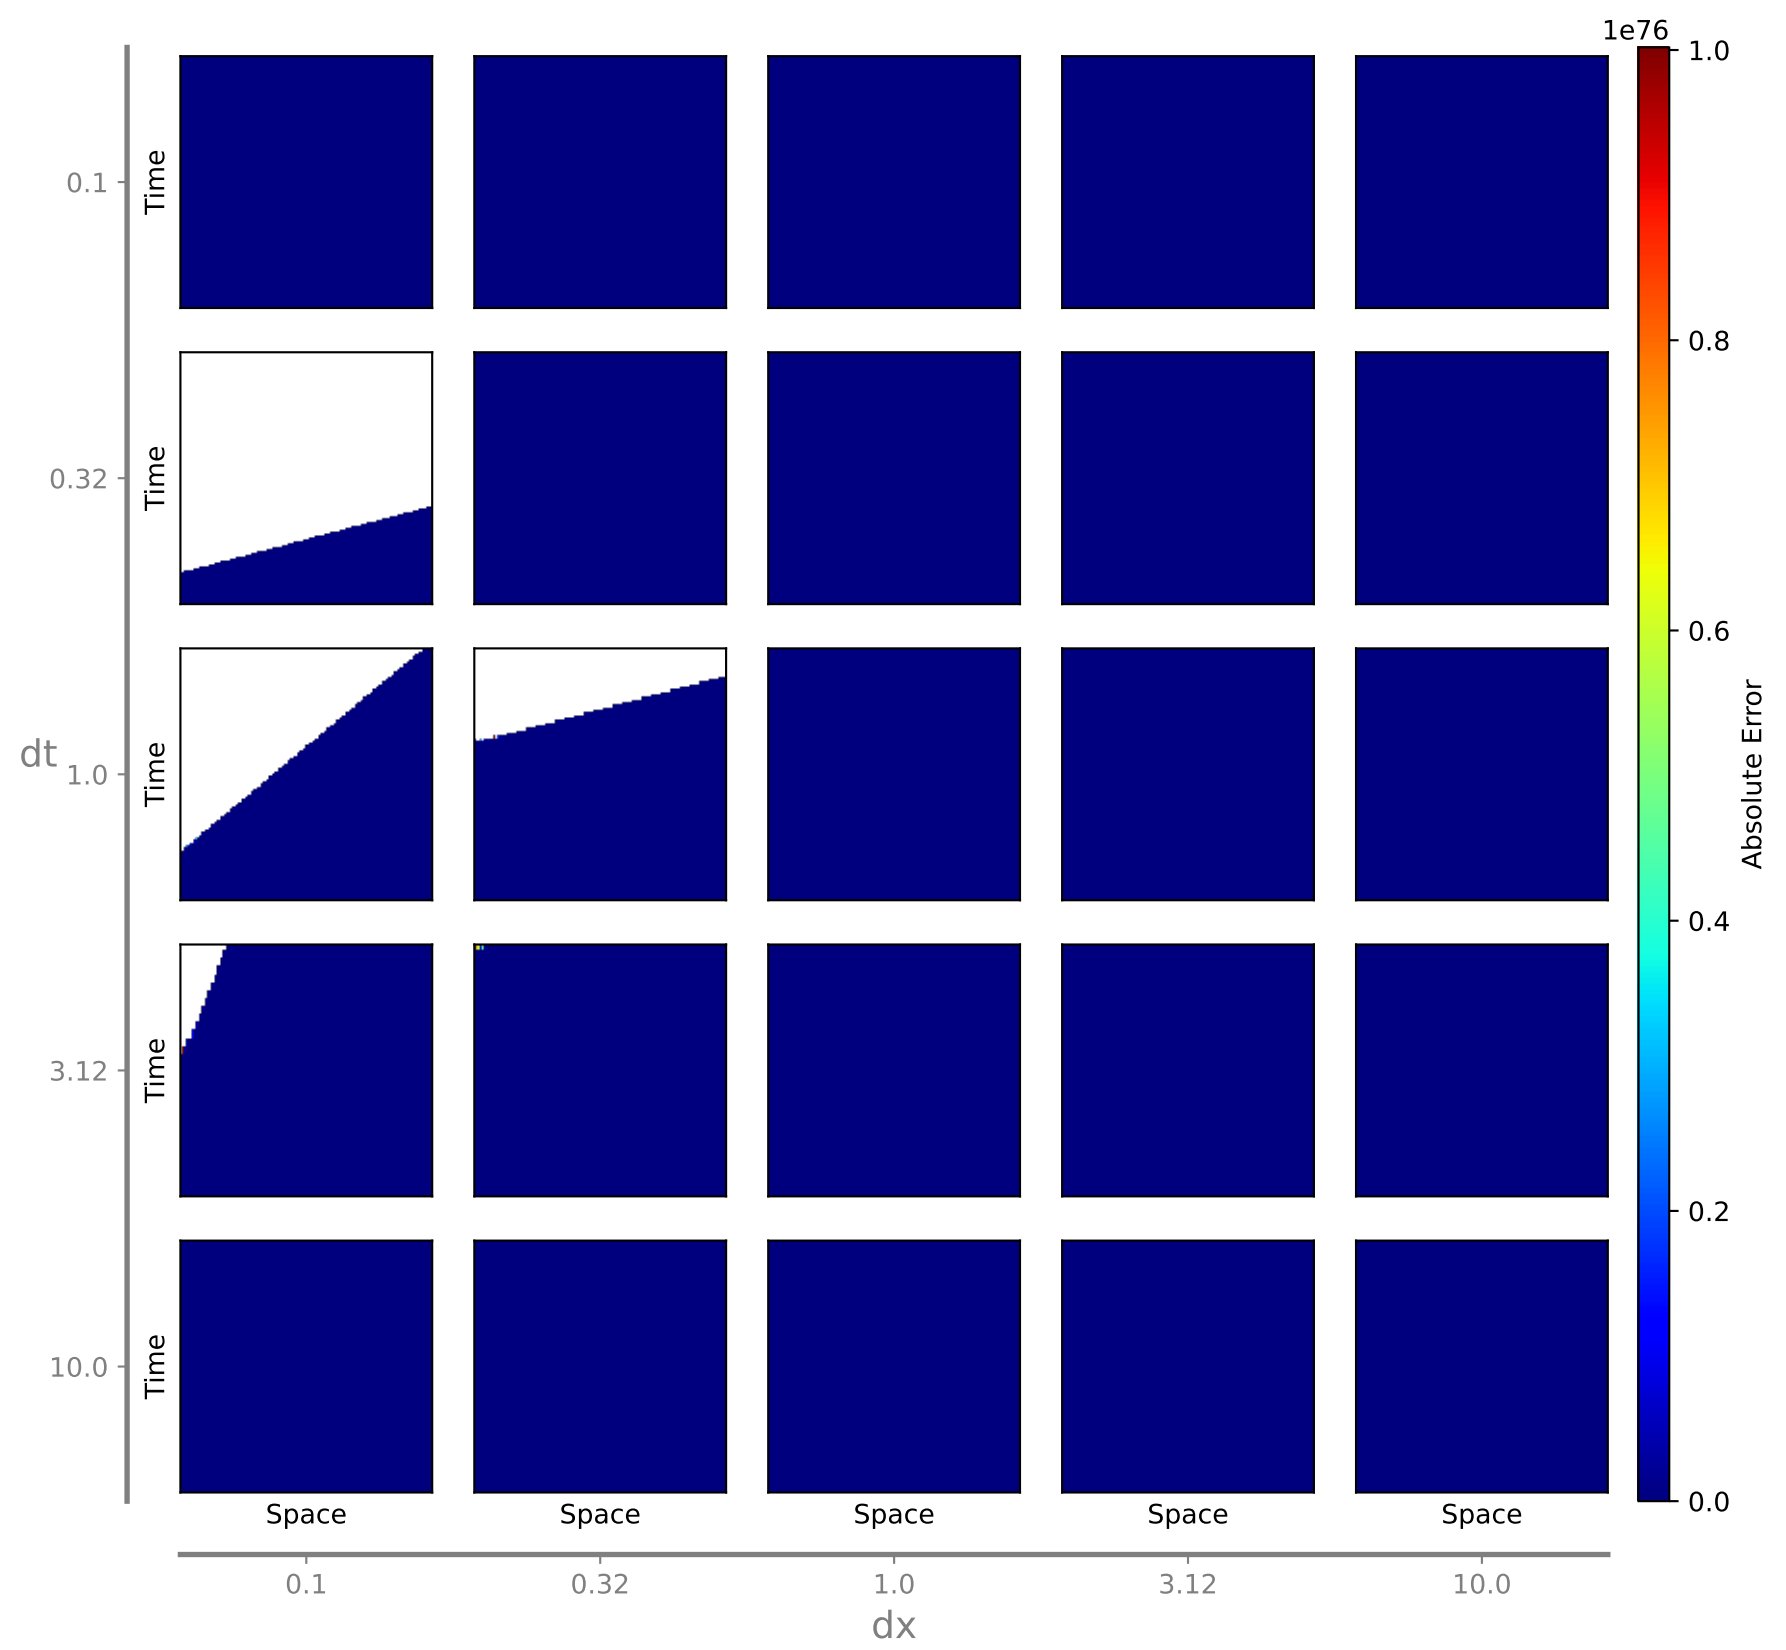

Supplement: supplementary_material [file rk4_result_spacetime_varying_discretization_exp_0_absolute_error.pdf › mega_mp_advection_on_metric_graphs/Results/Figures/rk4_result_spacetime_varying_discretization_exp_0_absolute_error.pdf]

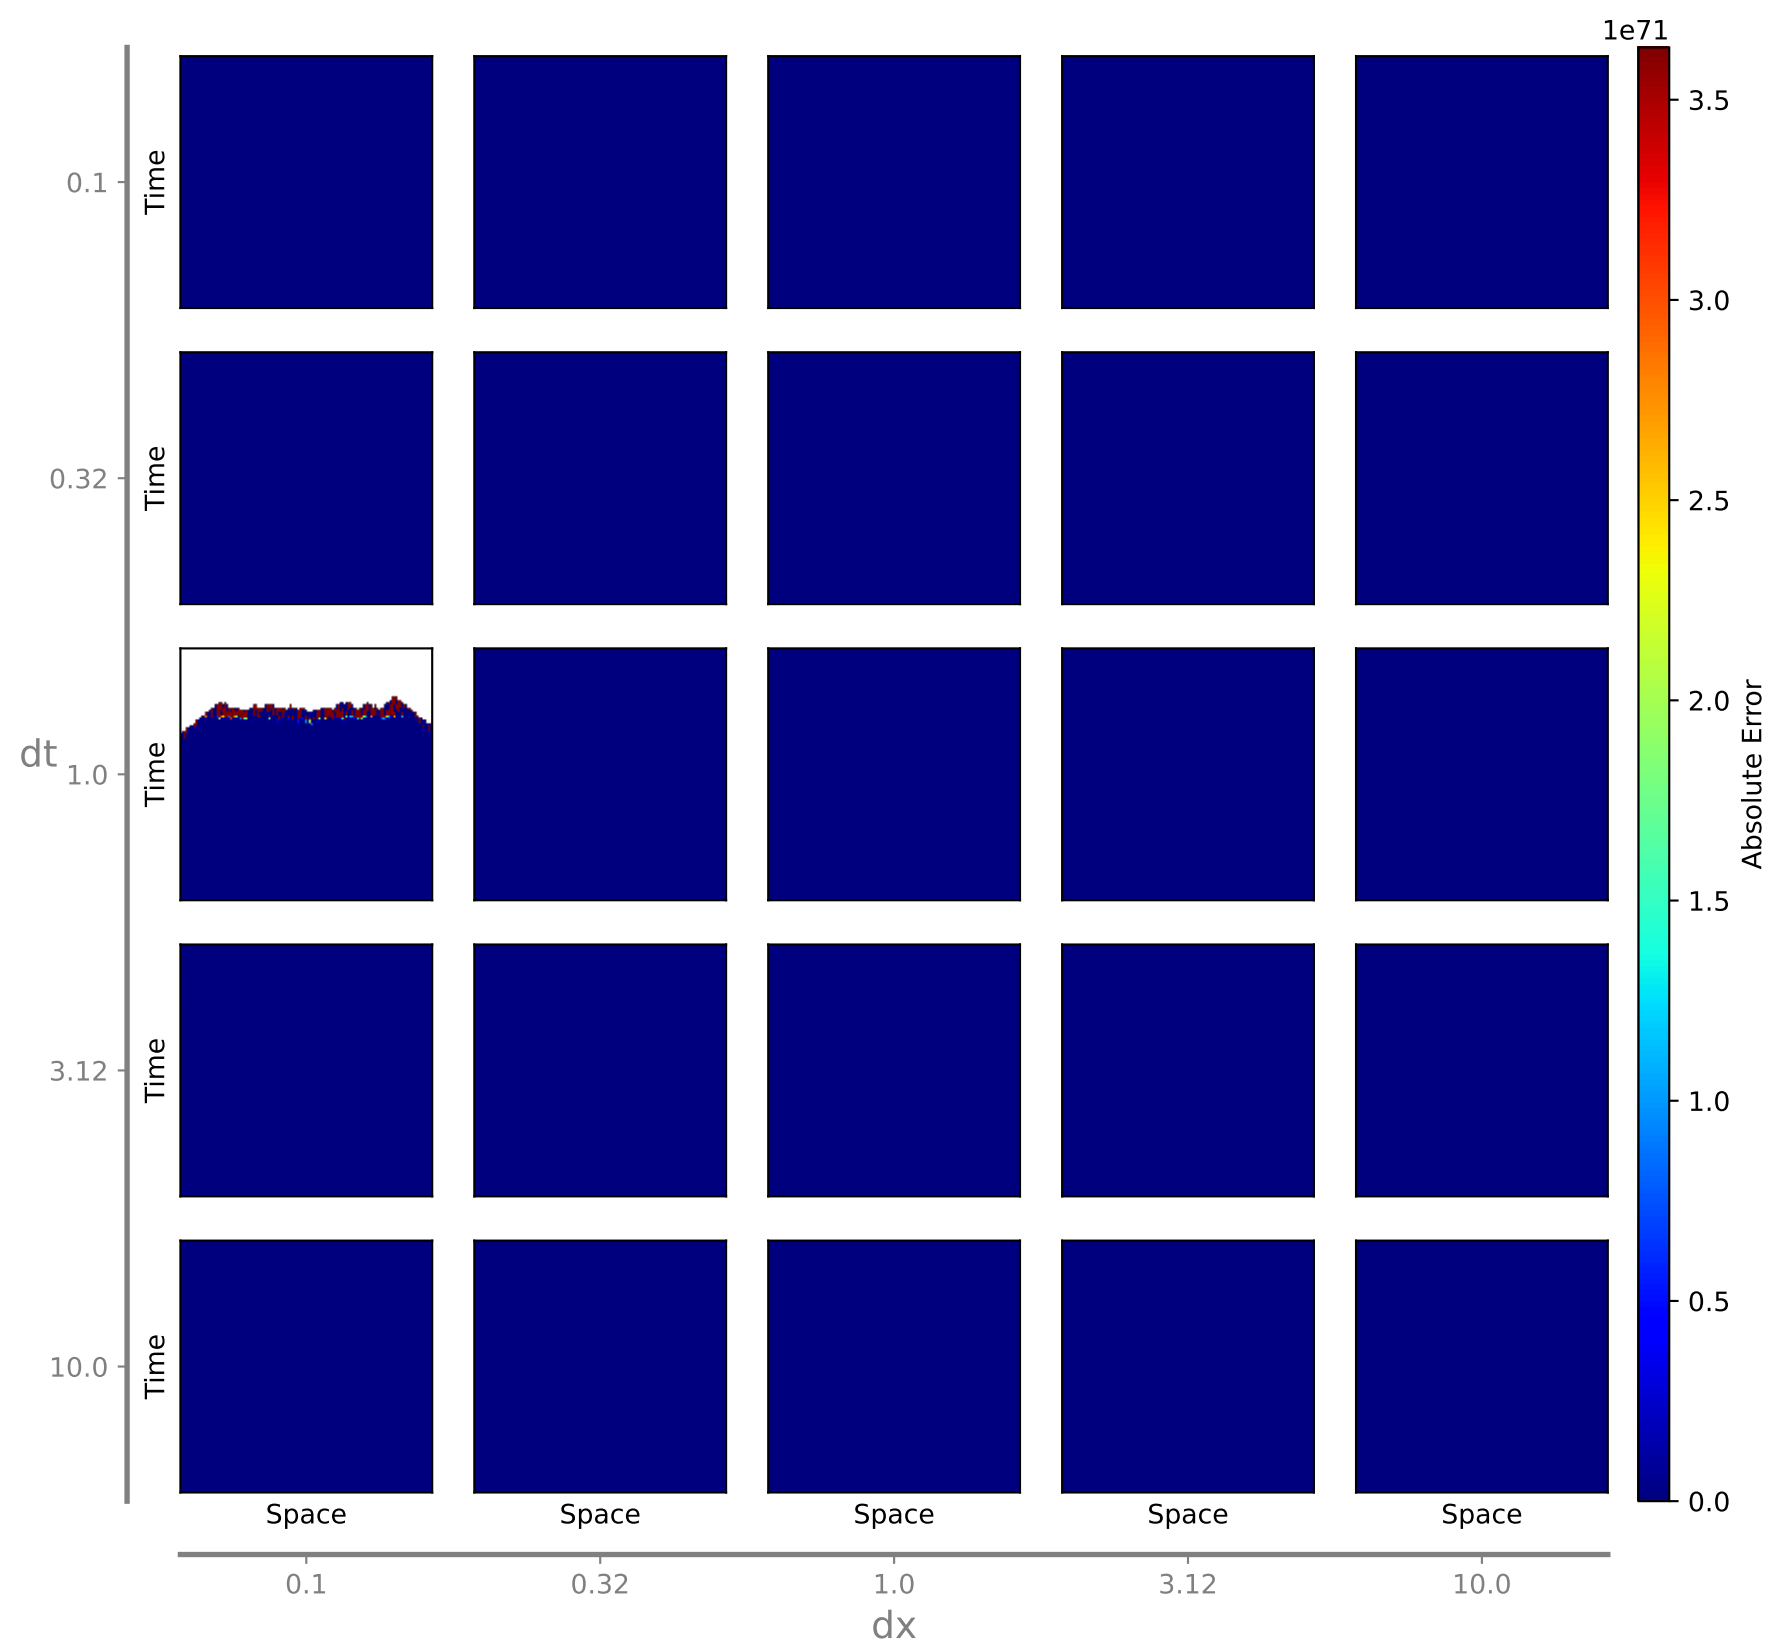

Supplement: supplementary_material [file rk4_result_spacetime_varying_discretization_exp_1.pdf › mega_mp_advection_on_metric_graphs/Results/Figures/rk4_result_spacetime_varying_discretization_exp_1.pdf]

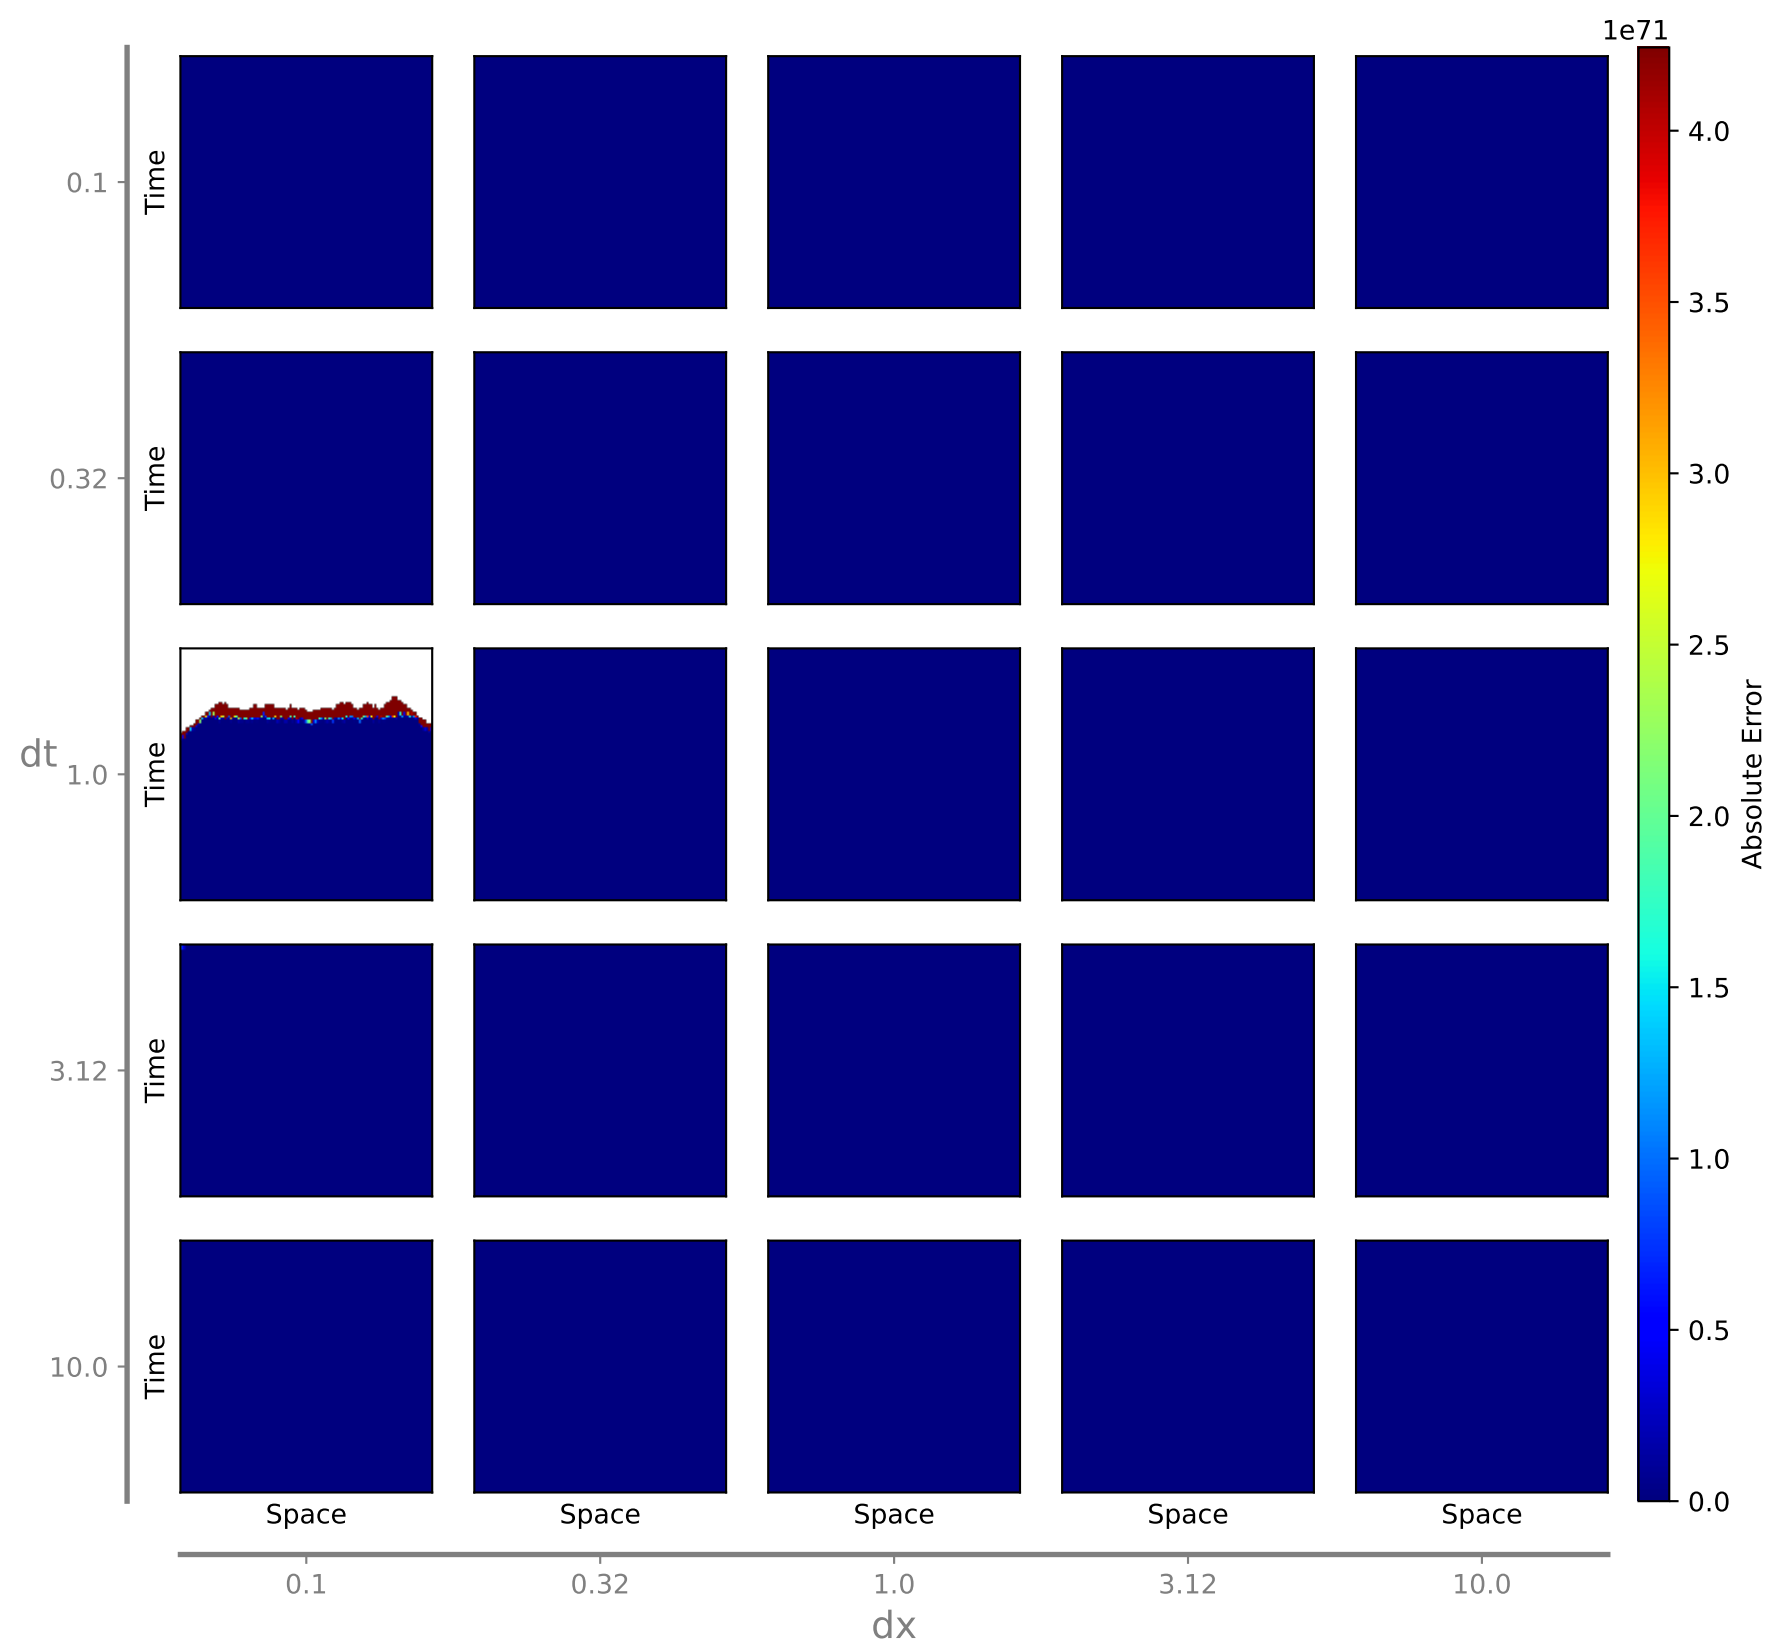

Supplement: supplementary_material [file rk4_result_spacetime_varying_discretization_exp_1_absolute_error.pdf › mega_mp_advection_on_metric_graphs/Results/Figures/rk4_result_spacetime_varying_discretization_exp_1_absolute_error.pdf]

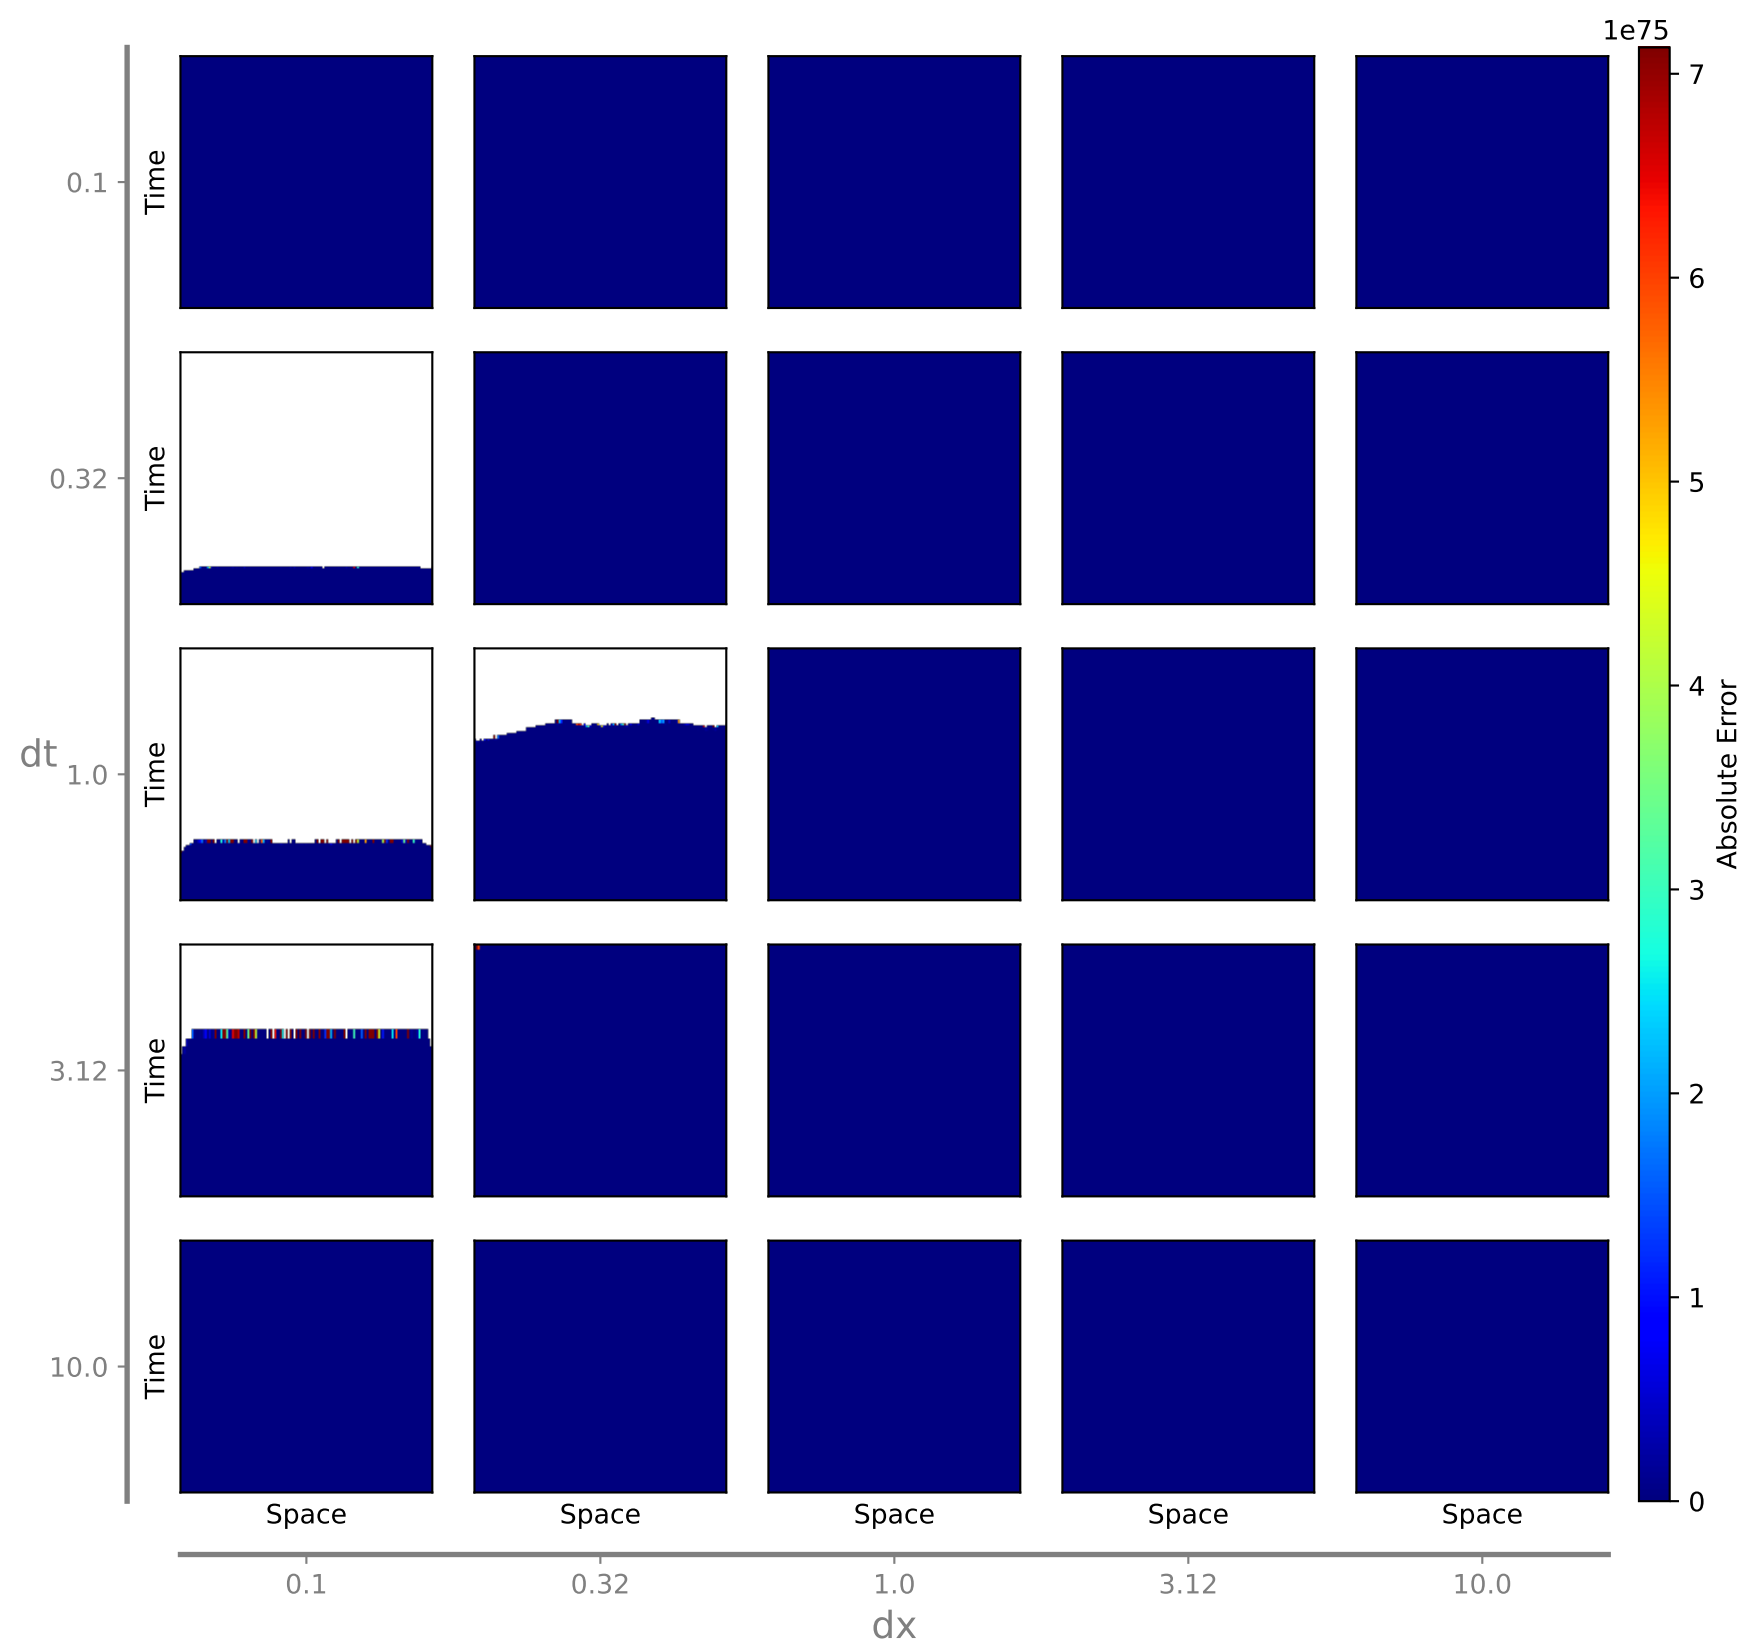

Supplement: supplementary_material [file rk4_result_spacetime_varying_discretization_exp_2.pdf › mega_mp_advection_on_metric_graphs/Results/Figures/rk4_result_spacetime_varying_discretization_exp_2.pdf]

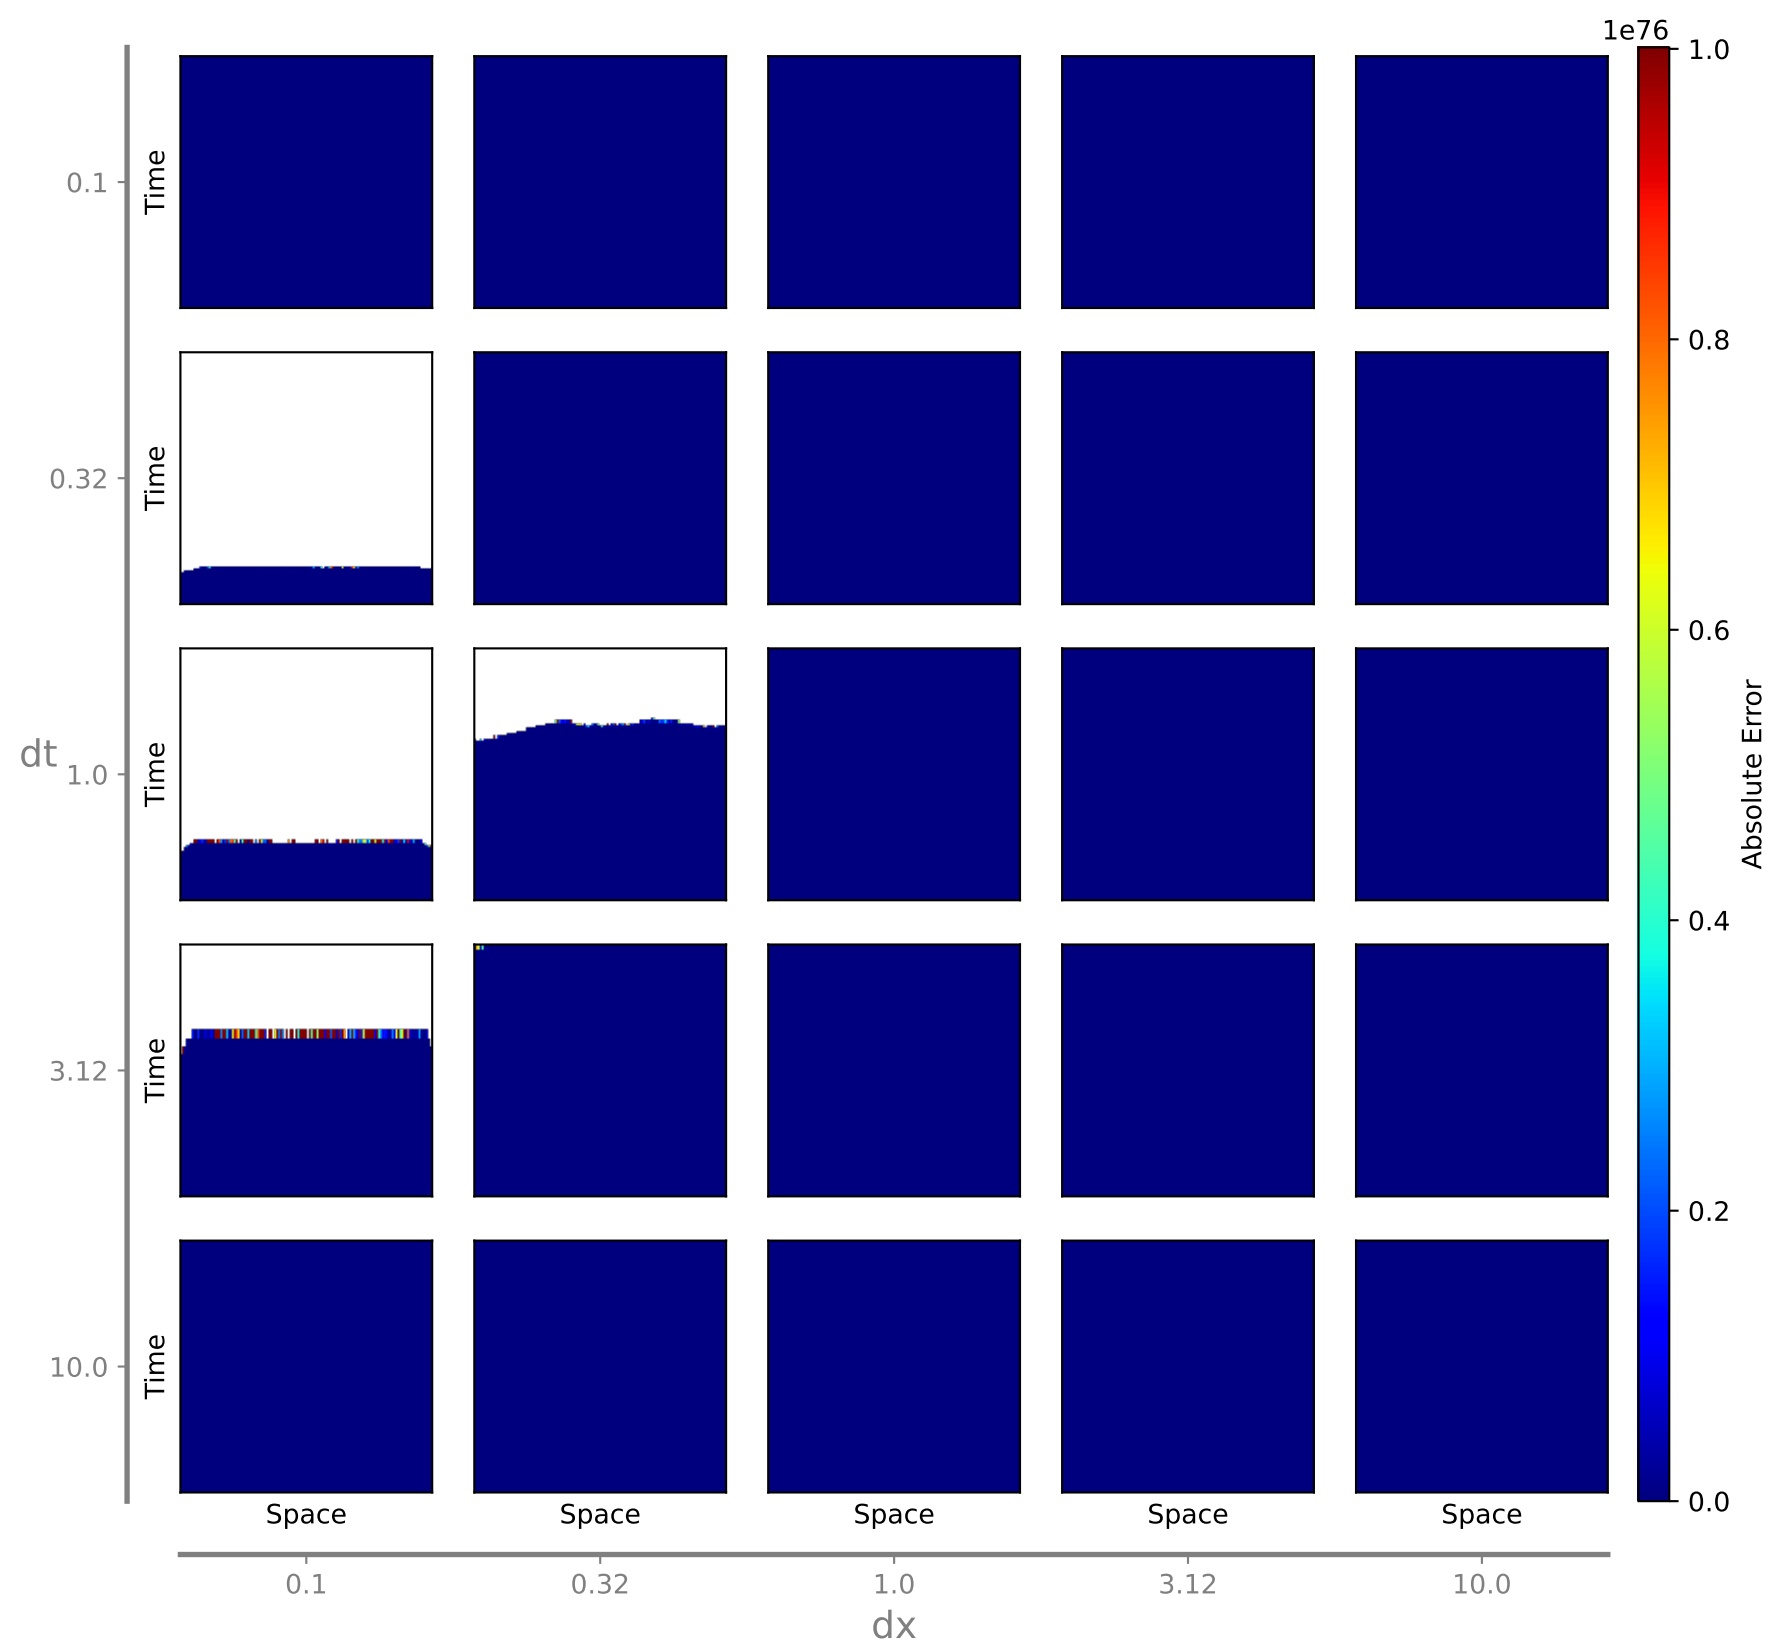

Supplement: supplementary_material [file rk4_result_spacetime_varying_discretization_exp_2_absolute_error.pdf › mega_mp_advection_on_metric_graphs/Results/Figures/rk4_result_spacetime_varying_discretization_exp_2_absolute_error.pdf]

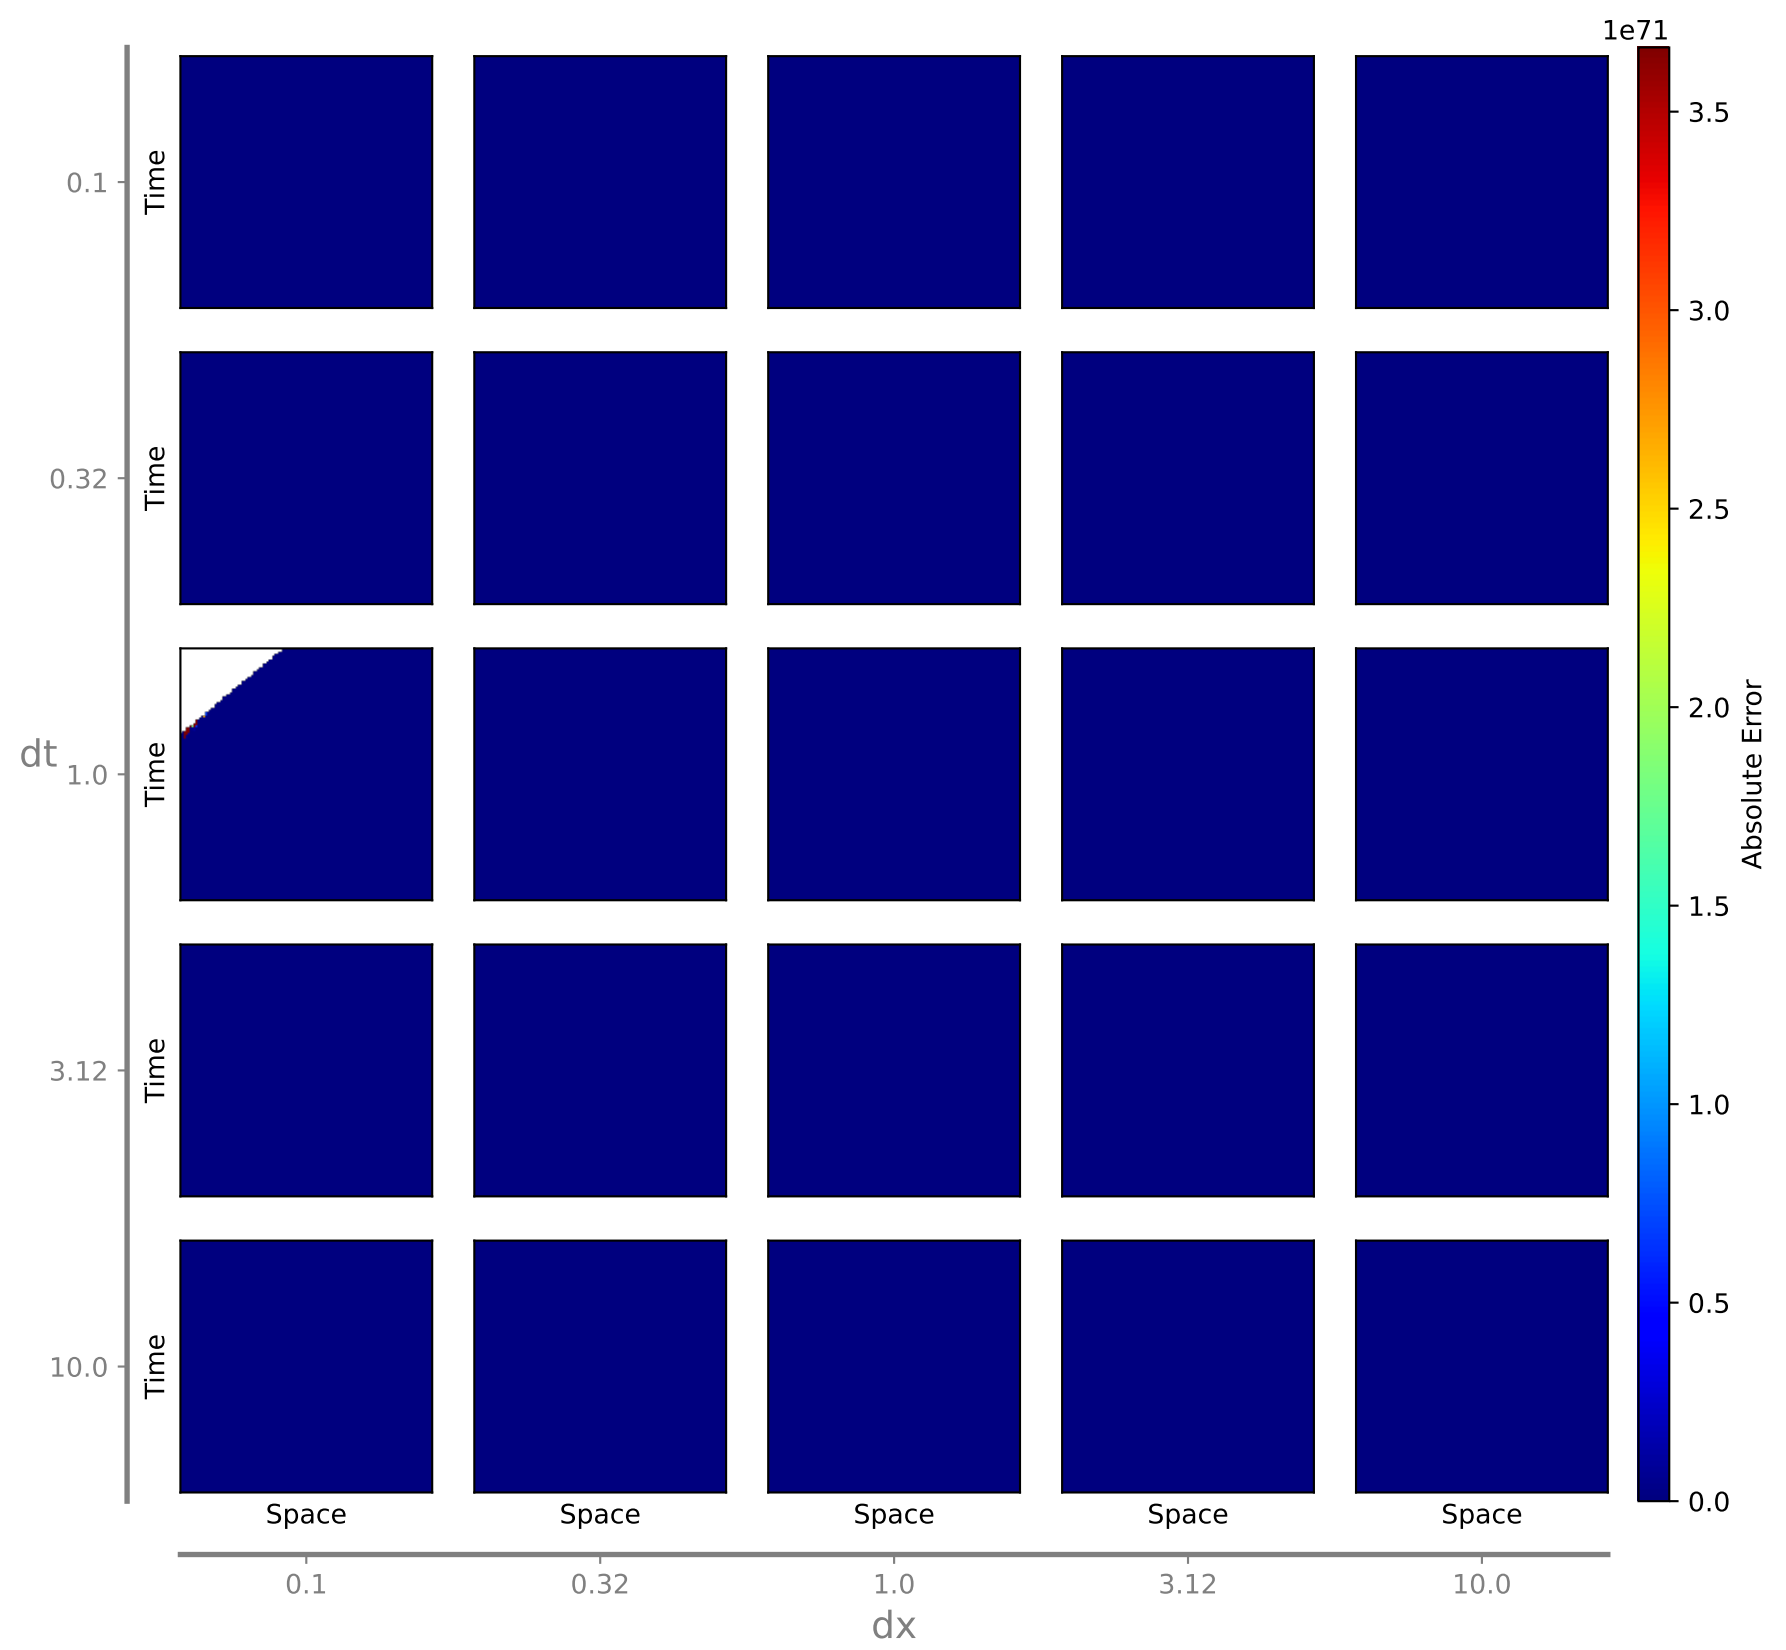

Supplement: supplementary_material [file rk4_result_spacetime_varying_discretization_exp_3.pdf › mega_mp_advection_on_metric_graphs/Results/Figures/rk4_result_spacetime_varying_discretization_exp_3.pdf]

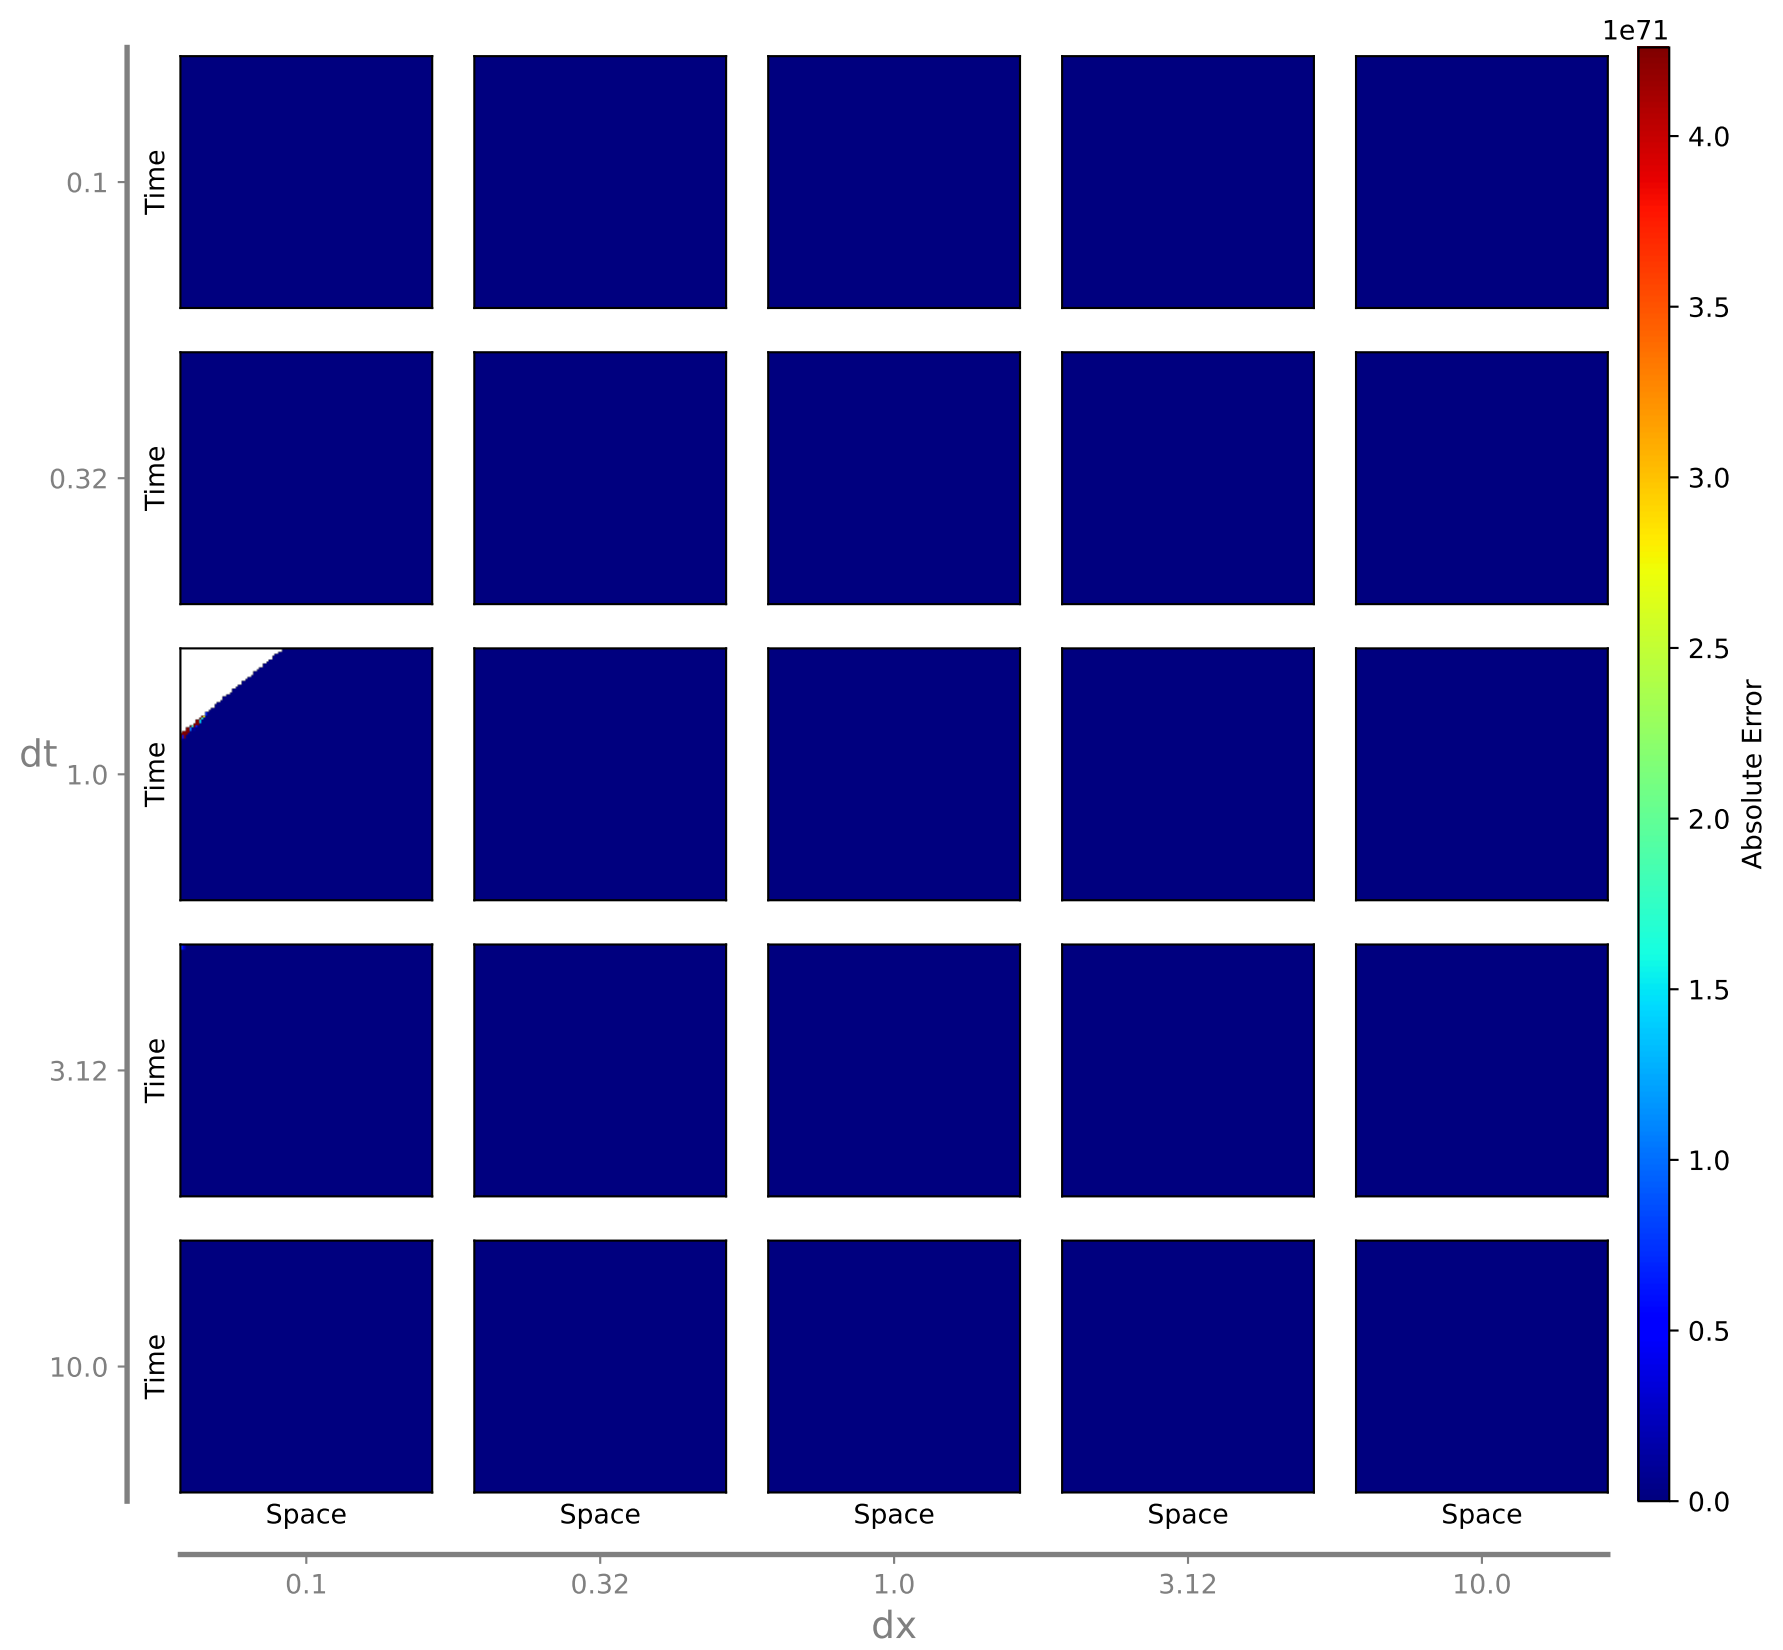

Supplement: supplementary_material [file rk4_result_spacetime_varying_discretization_exp_3_absolute_error.pdf › mega_mp_advection_on_metric_graphs/Results/Figures/rk4_result_spacetime_varying_discretization_exp_3_absolute_error.pdf]

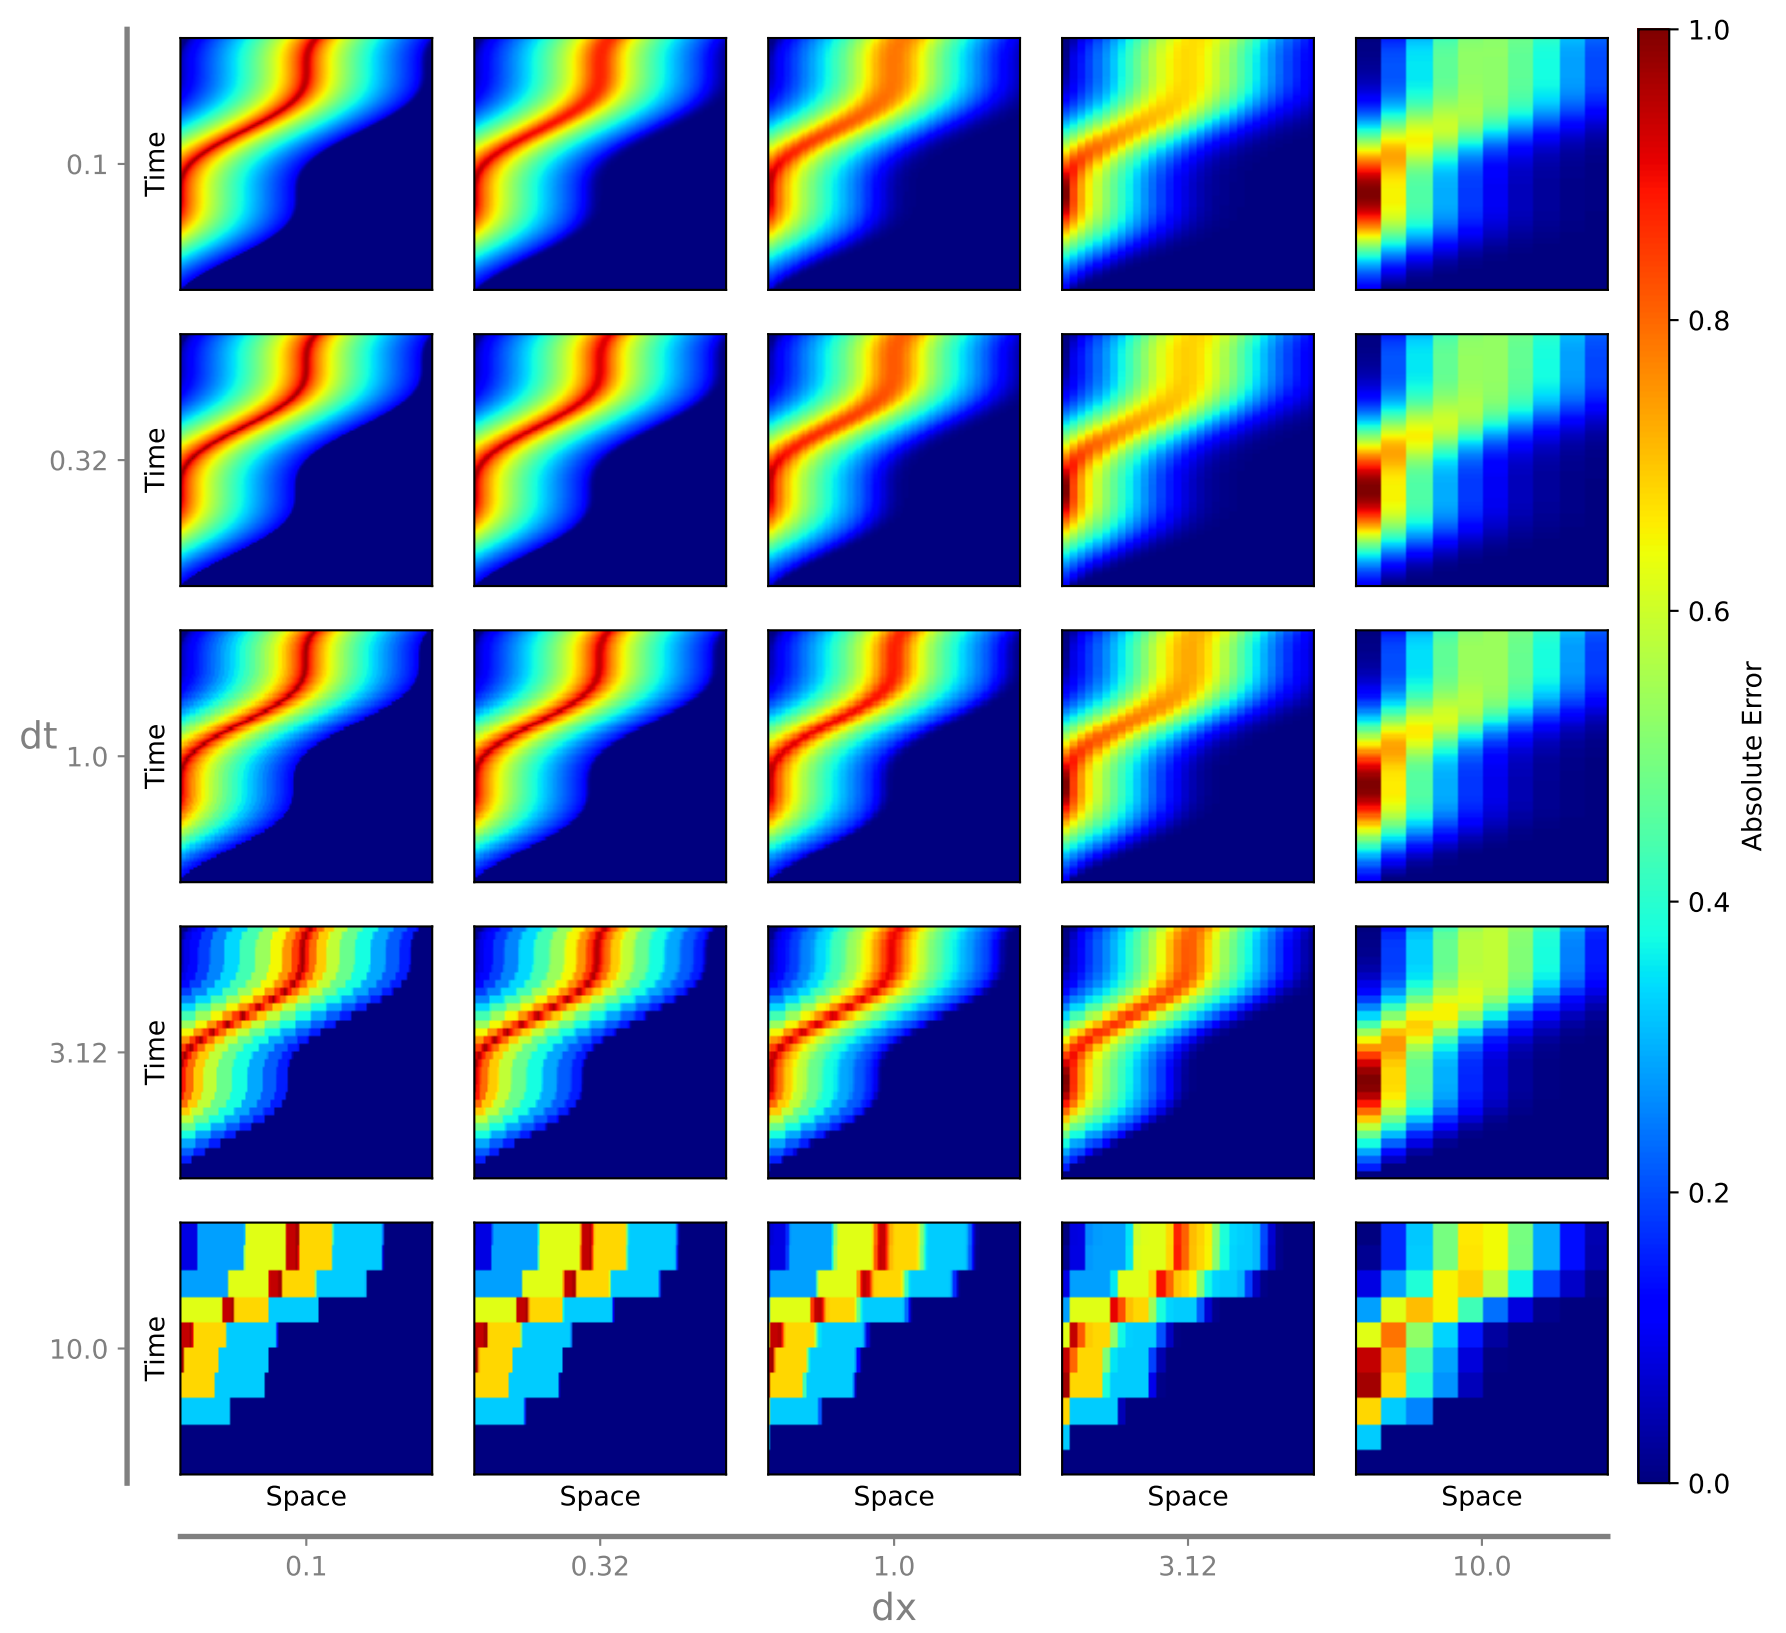

Supplement: supplementary_material [file sl_result_spacetime_varying_discretization_exp_0.pdf › mega_mp_advection_on_metric_graphs/Results/Figures/sl_result_spacetime_varying_discretization_exp_0.pdf]

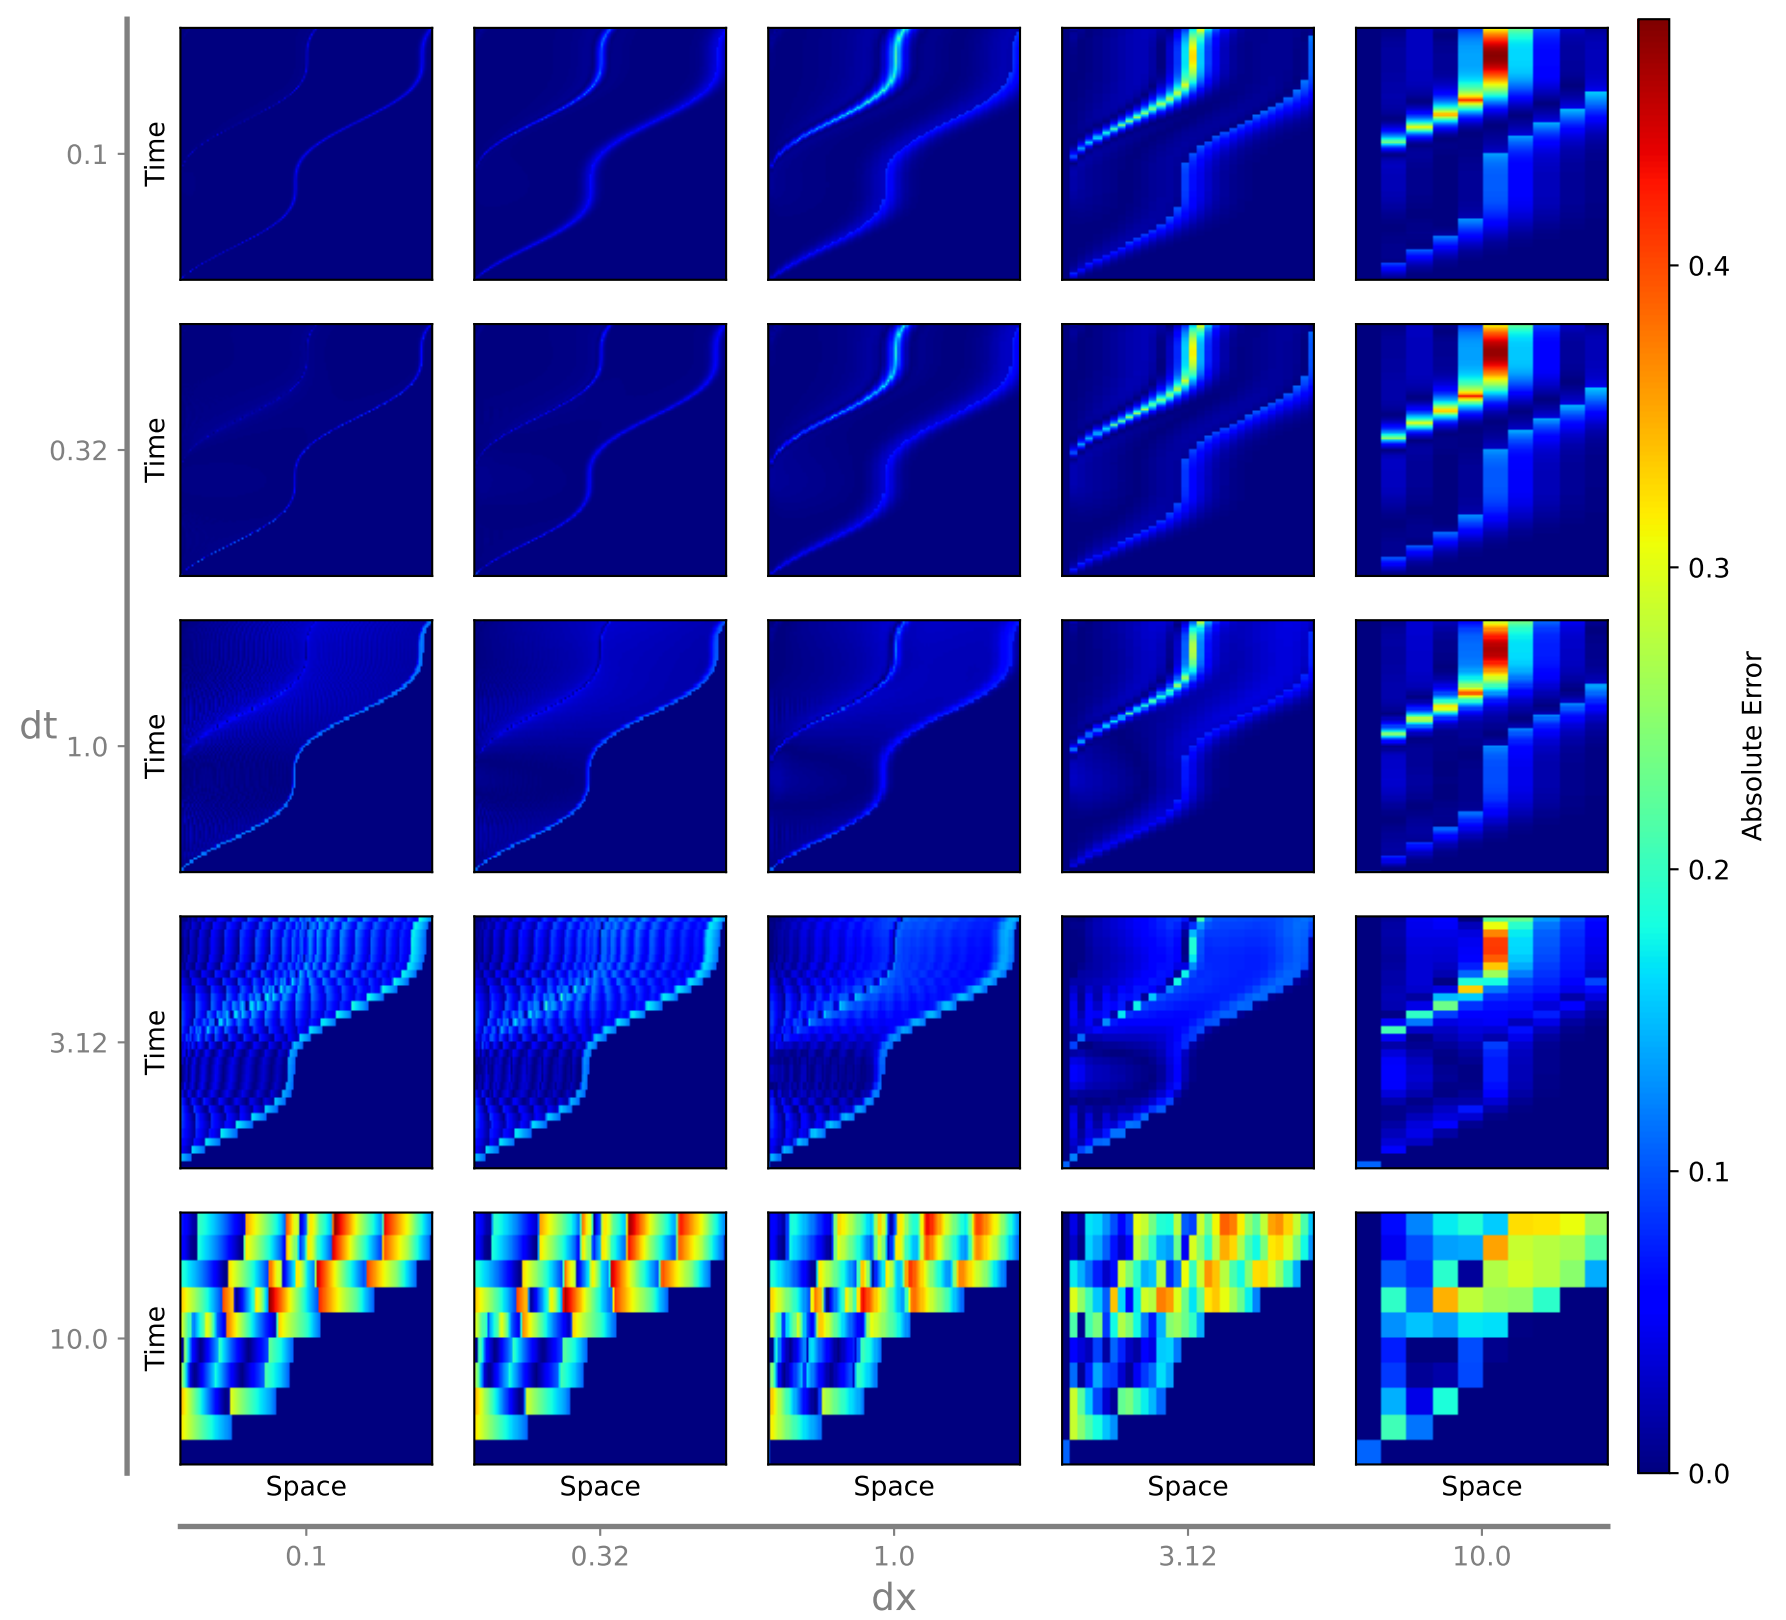

Supplement: supplementary_material [file sl_result_spacetime_varying_discretization_exp_0_absolute_error.pdf › mega_mp_advection_on_metric_graphs/Results/Figures/sl_result_spacetime_varying_discretization_exp_0_absolute_error.pdf]

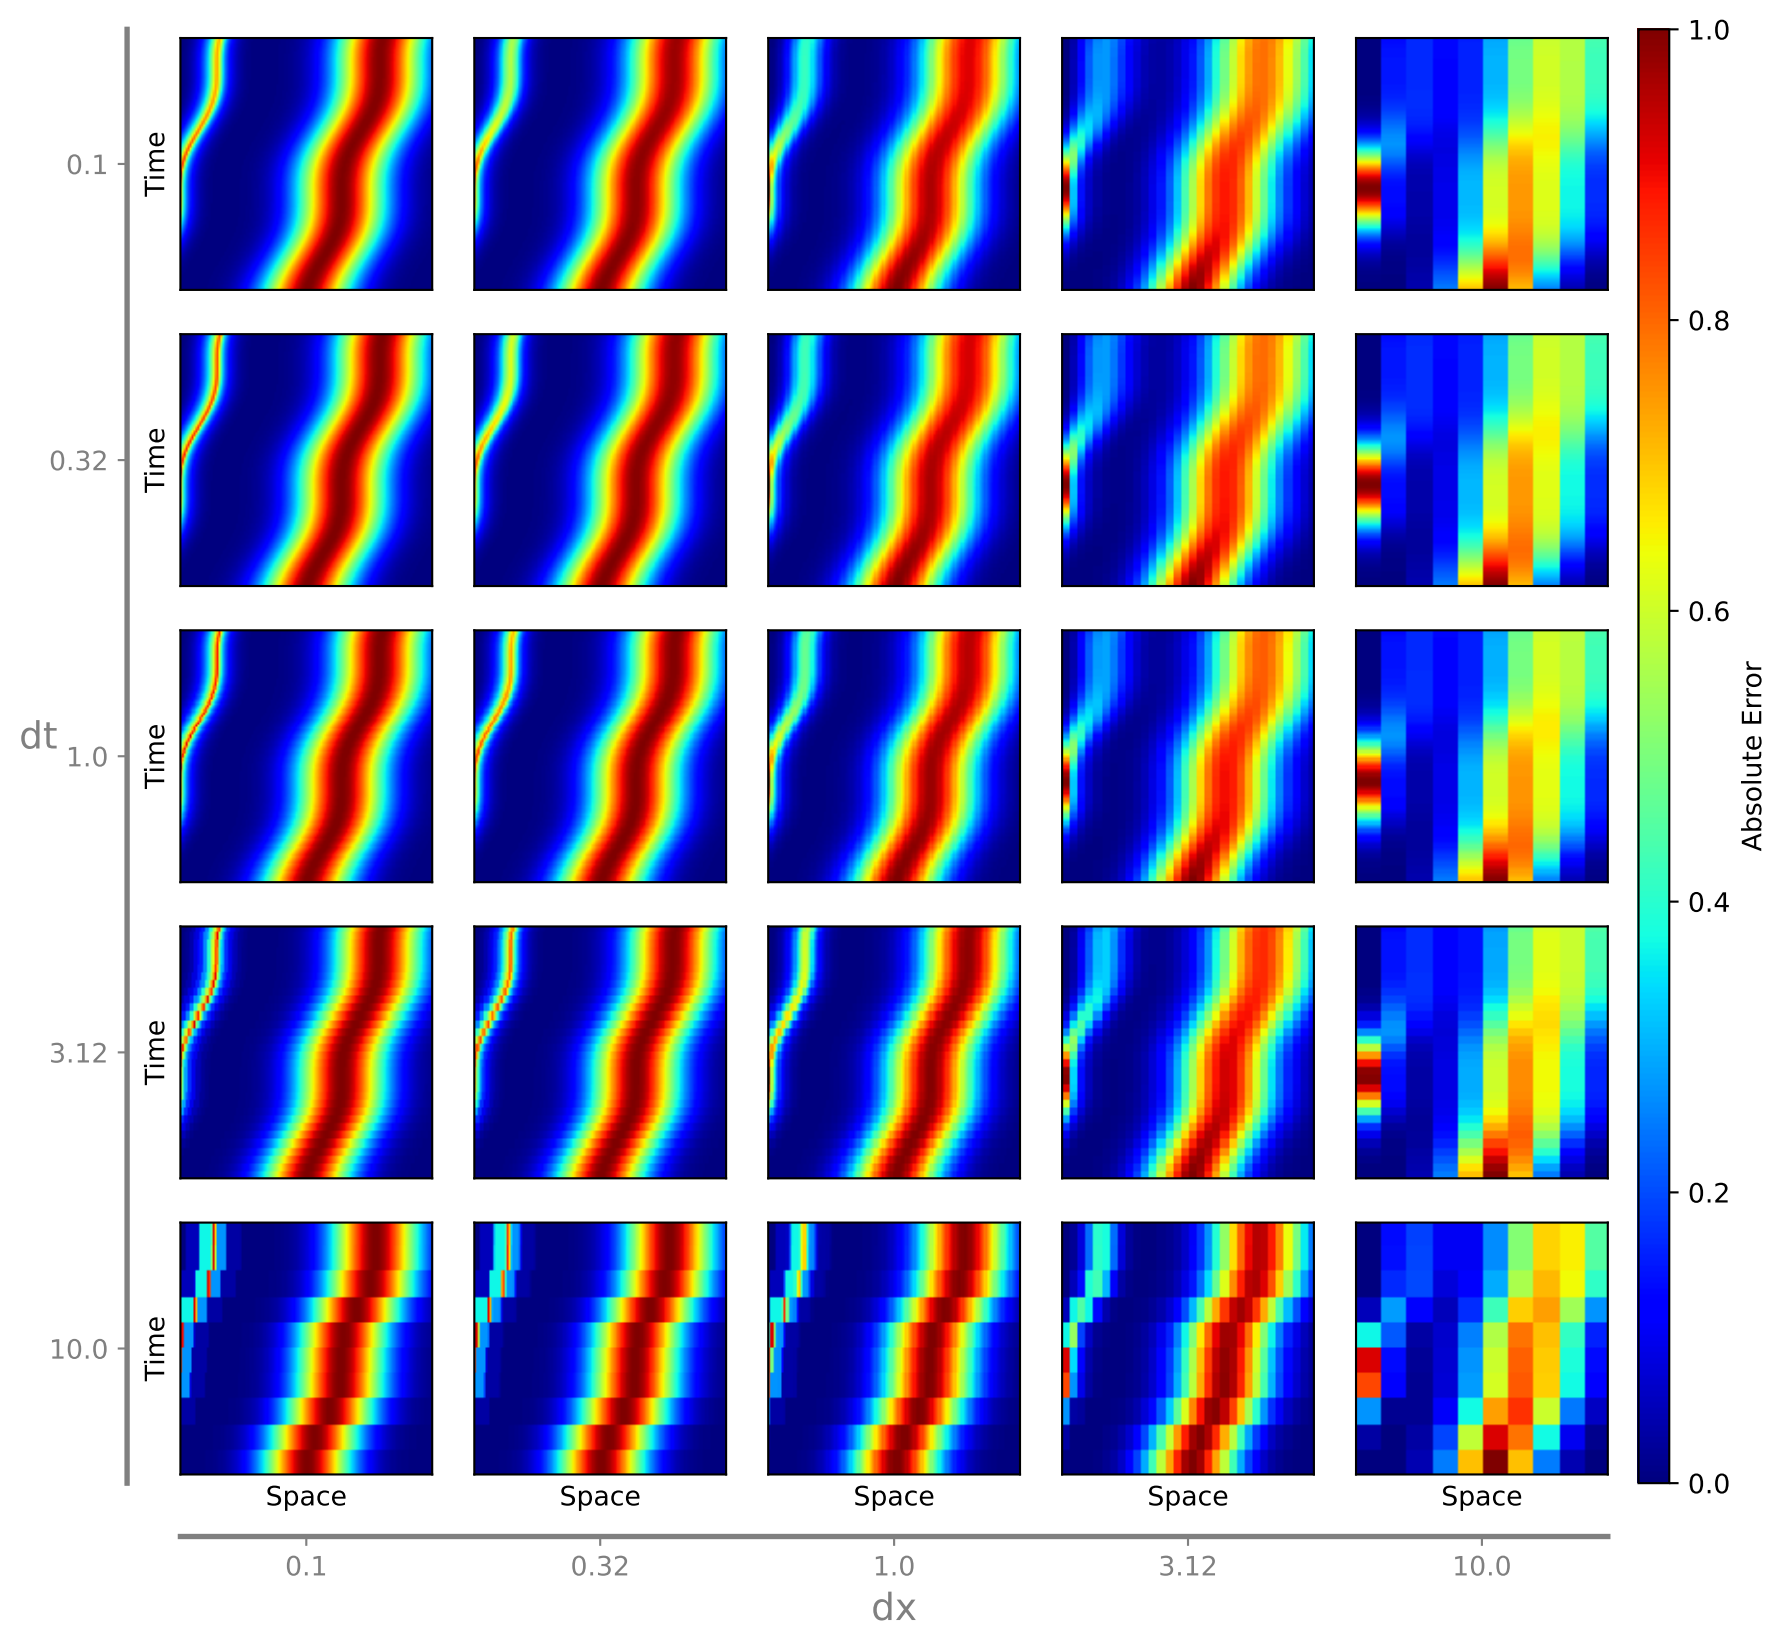

Supplement: supplementary_material [file sl_result_spacetime_varying_discretization_exp_1.pdf › mega_mp_advection_on_metric_graphs/Results/Figures/sl_result_spacetime_varying_discretization_exp_1.pdf]

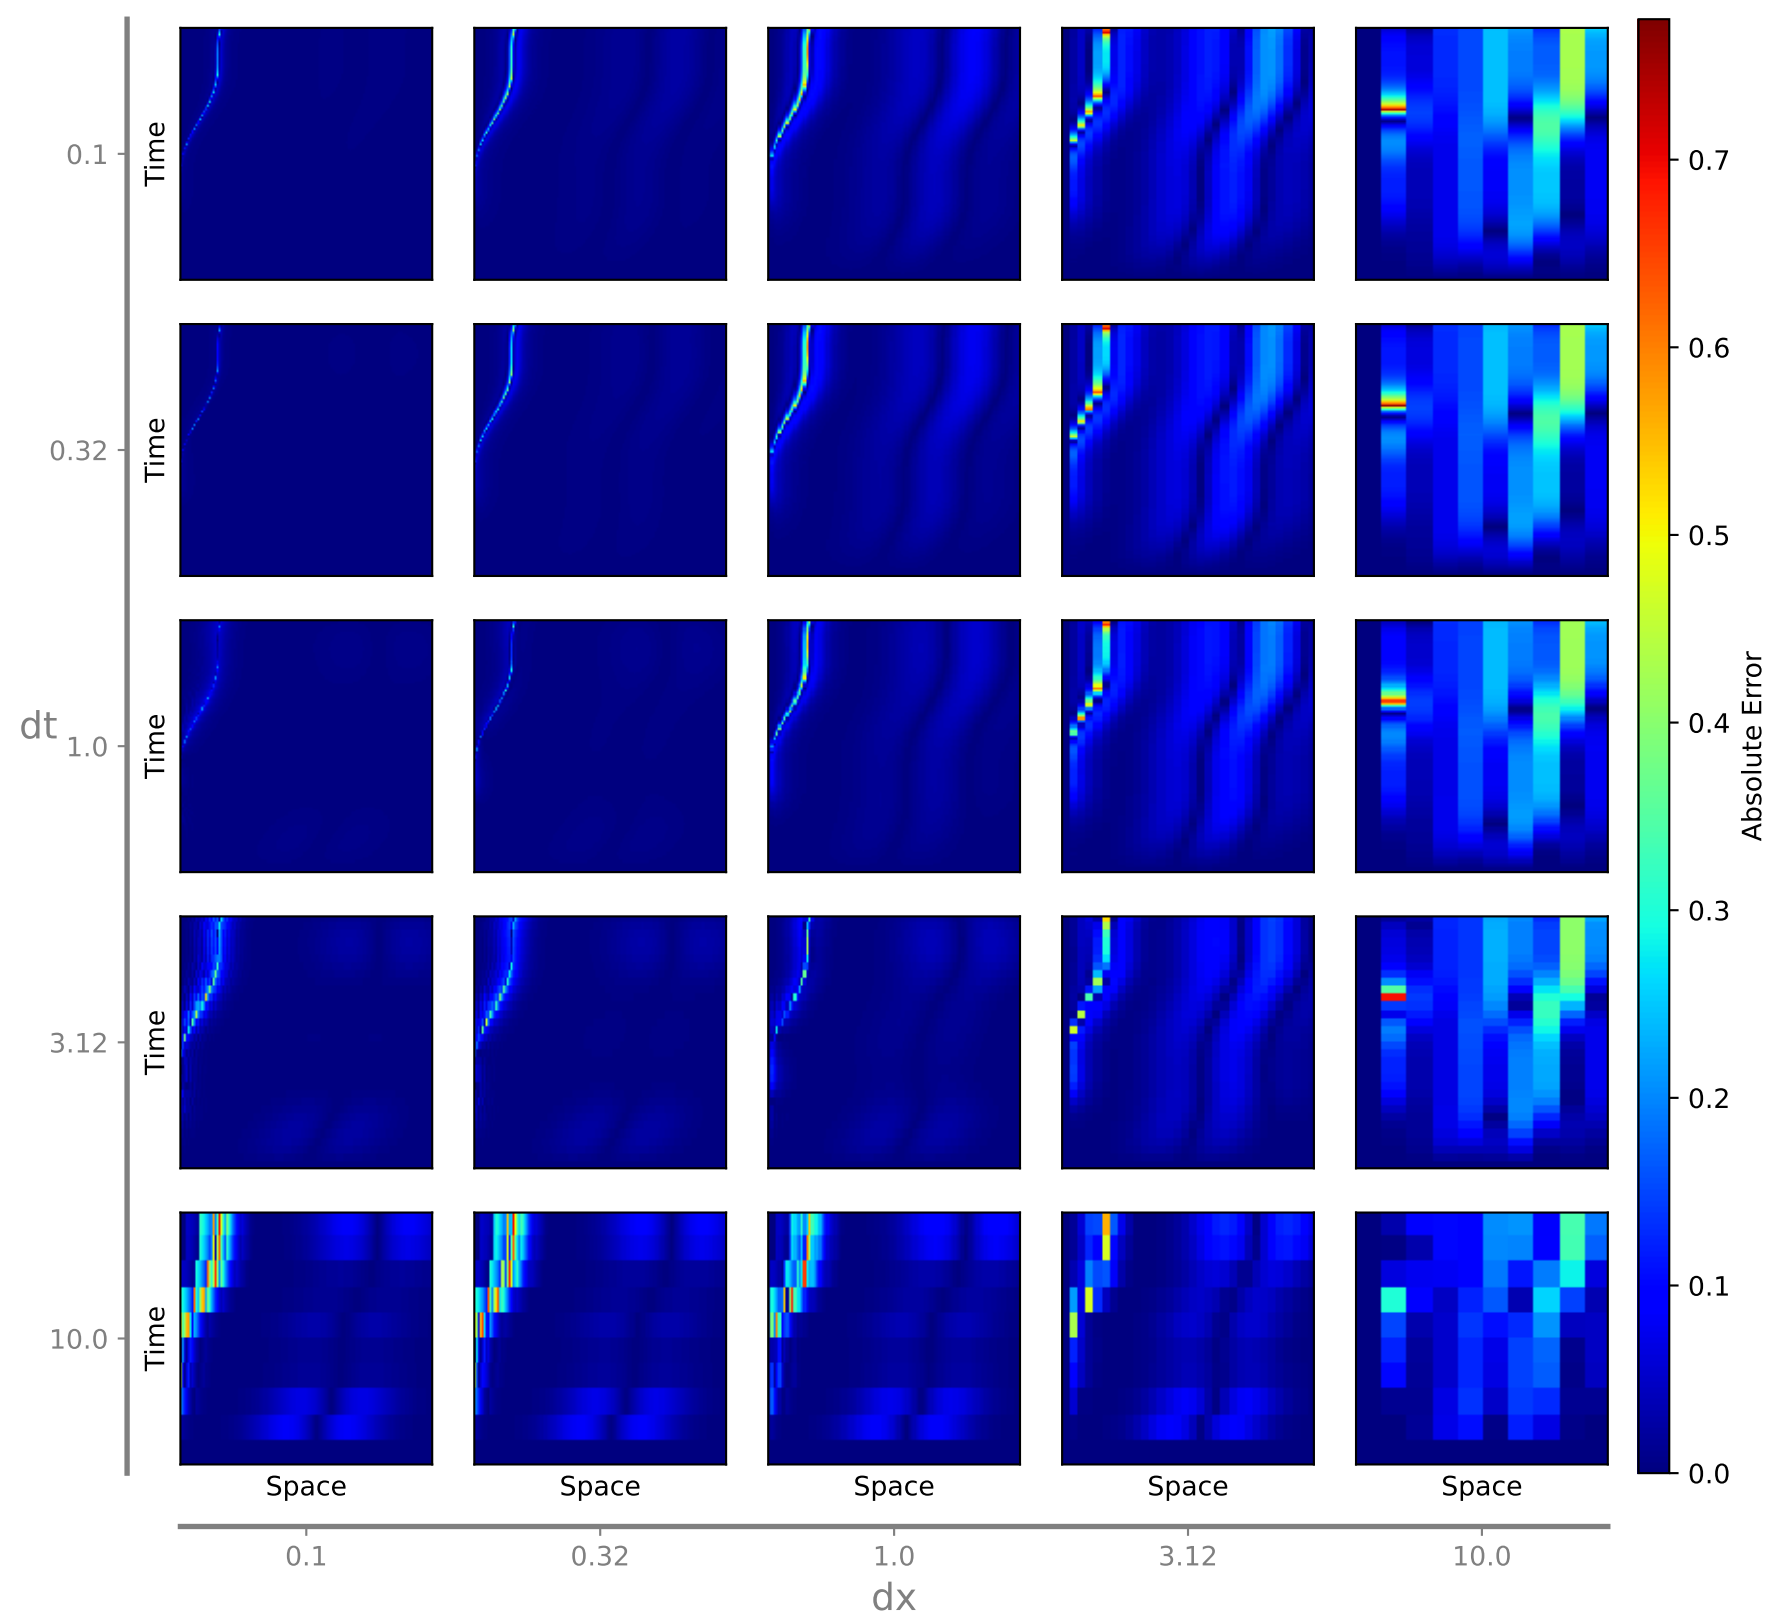

Supplement: supplementary_material [file sl_result_spacetime_varying_discretization_exp_1_absolute_error.pdf › mega_mp_advection_on_metric_graphs/Results/Figures/sl_result_spacetime_varying_discretization_exp_1_absolute_error.pdf]

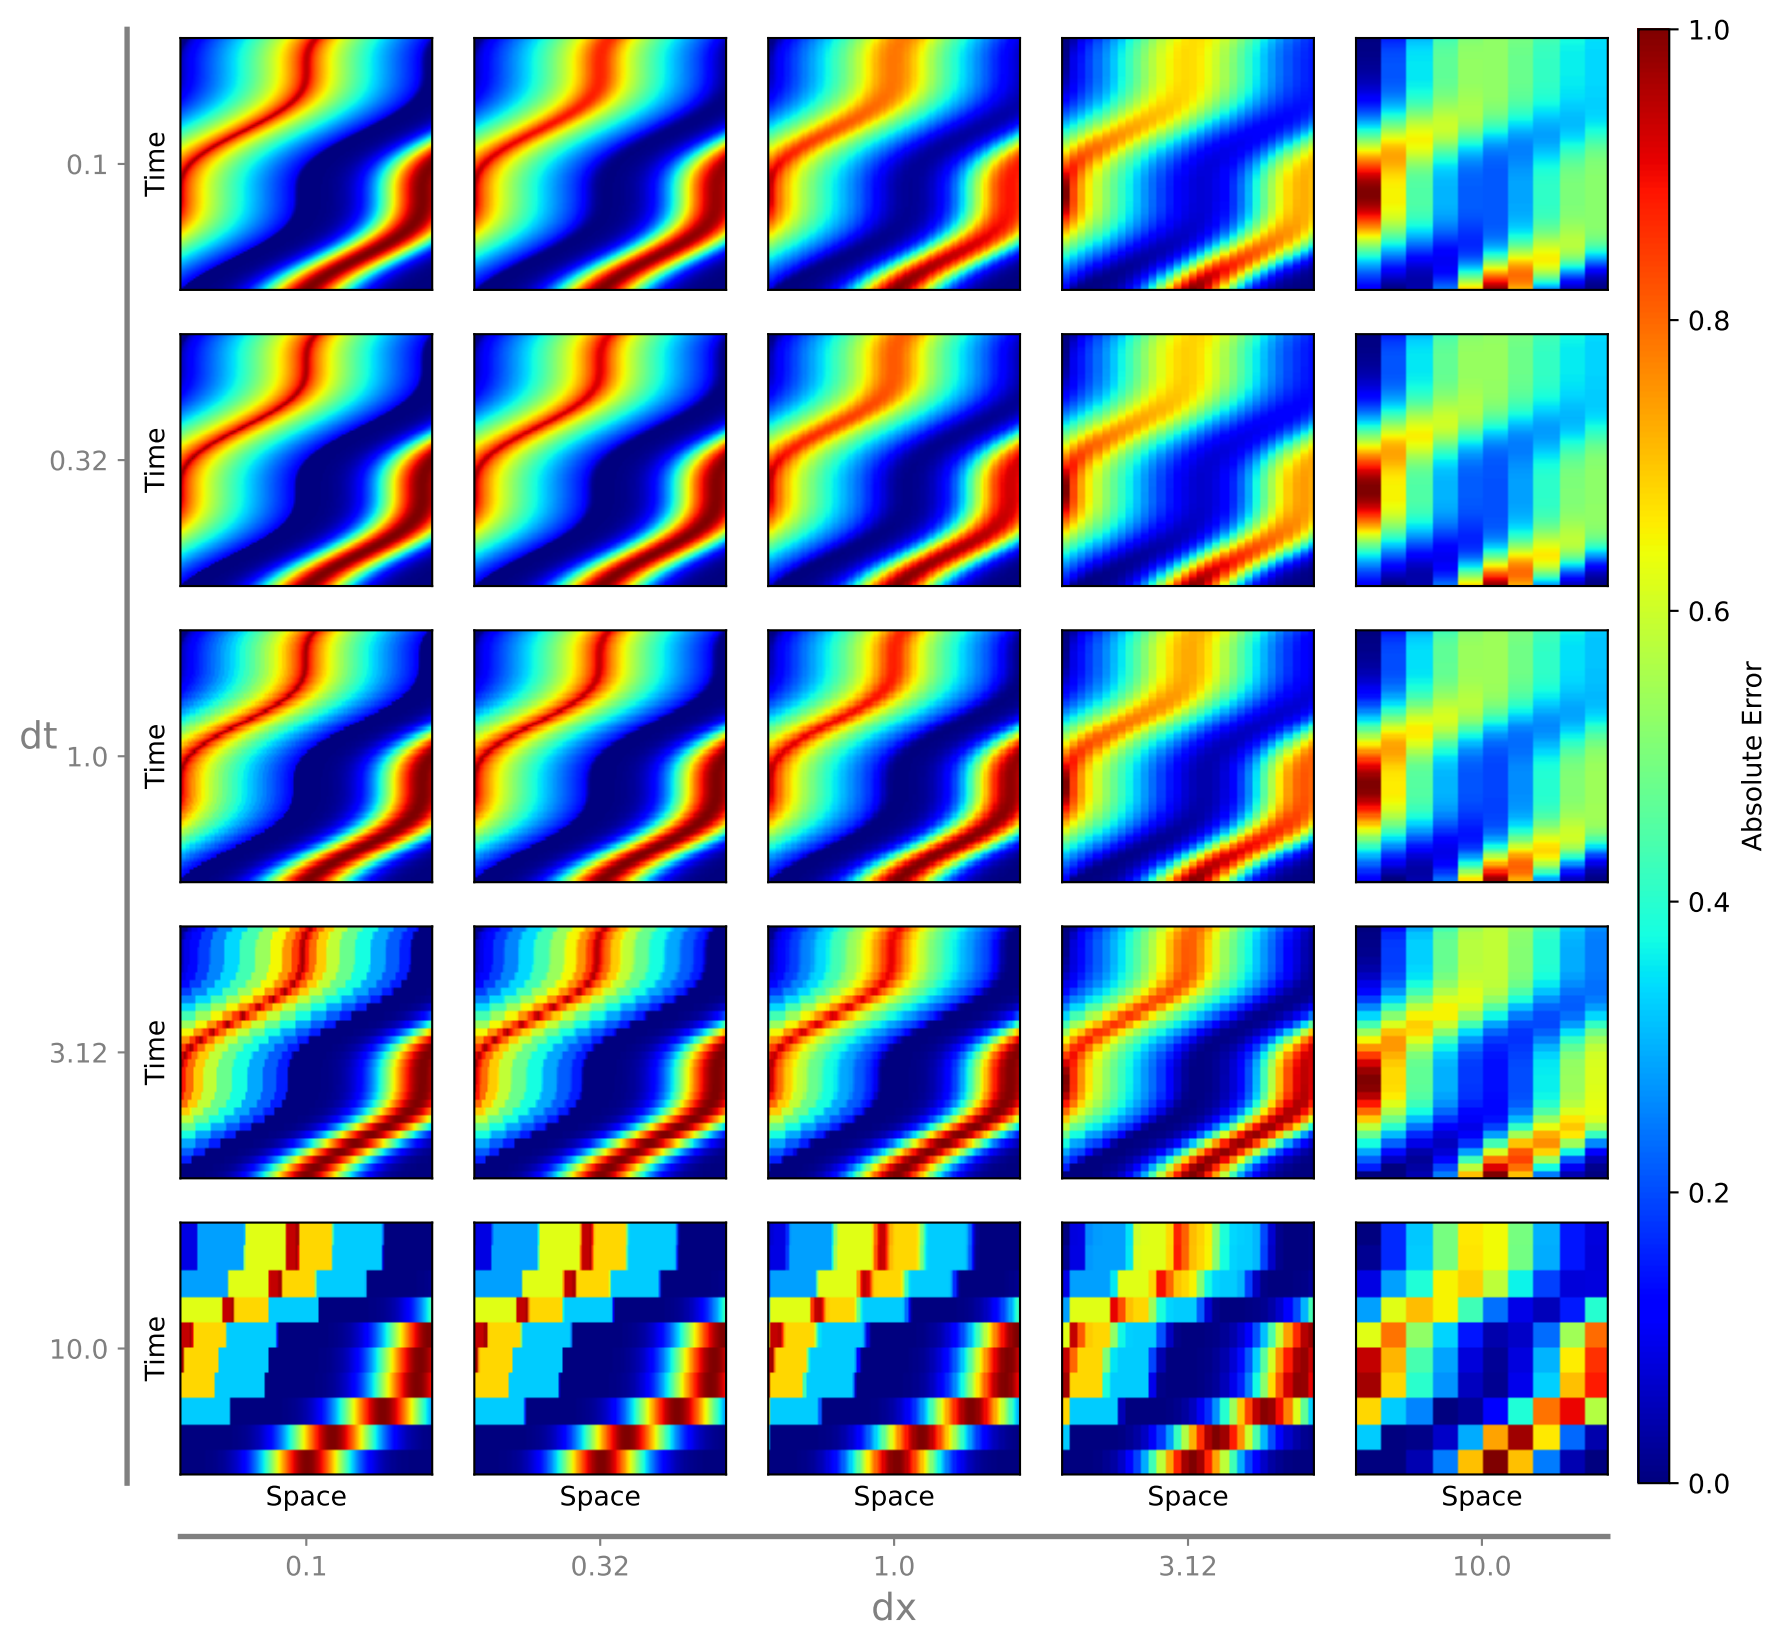

Supplement: supplementary_material [file sl_result_spacetime_varying_discretization_exp_2.pdf › mega_mp_advection_on_metric_graphs/Results/Figures/sl_result_spacetime_varying_discretization_exp_2.pdf]

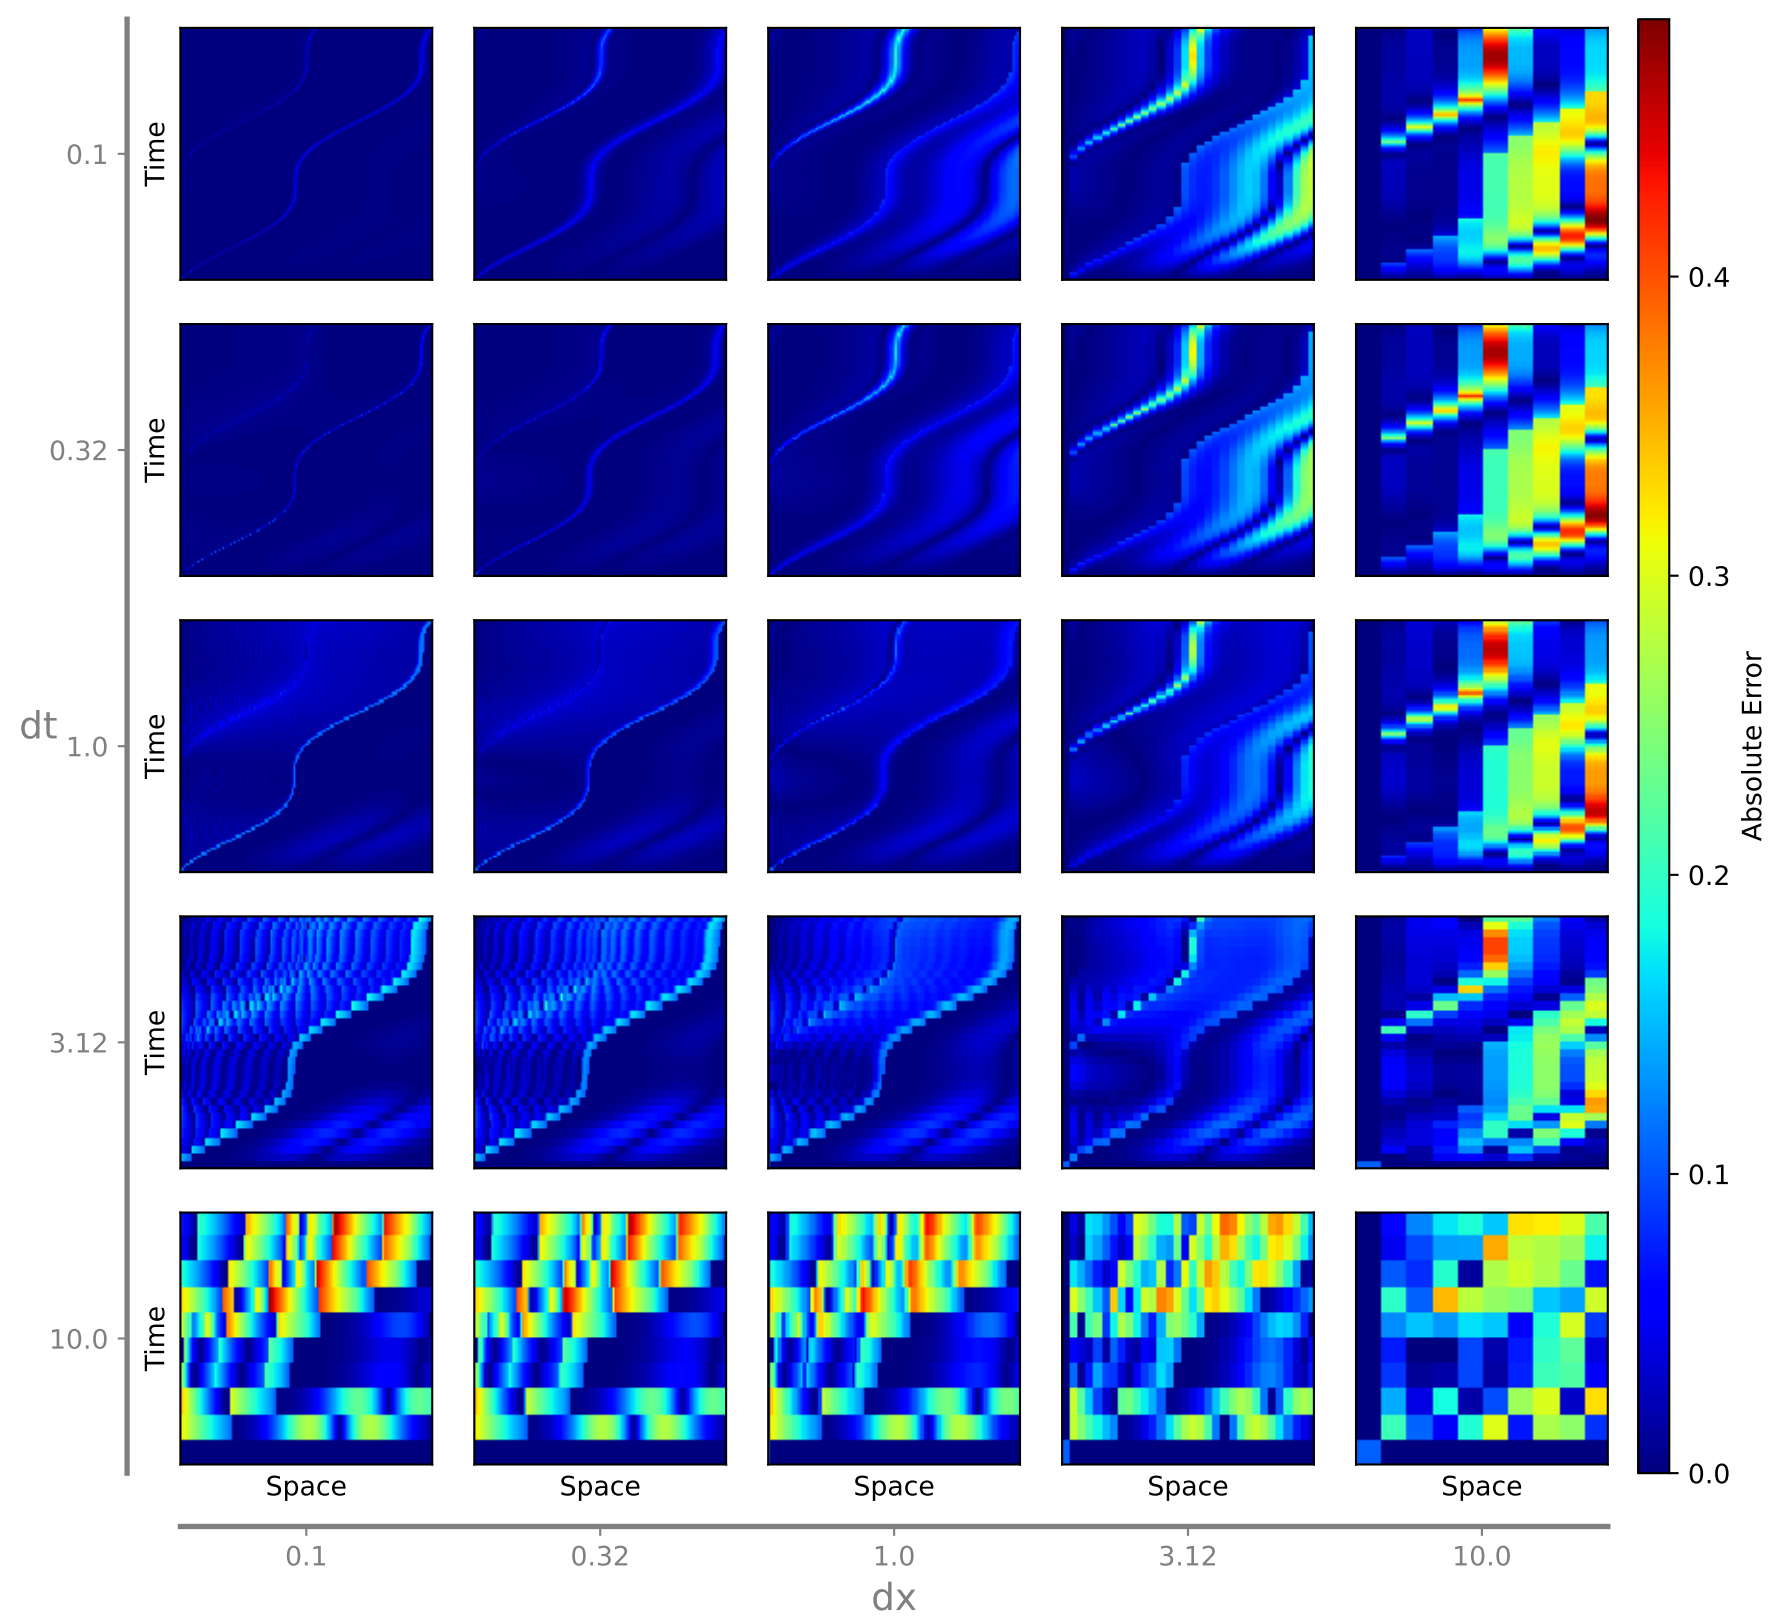

Supplement: supplementary_material [file sl_result_spacetime_varying_discretization_exp_2_absolute_error.pdf › mega_mp_advection_on_metric_graphs/Results/Figures/sl_result_spacetime_varying_discretization_exp_2_absolute_error.pdf]

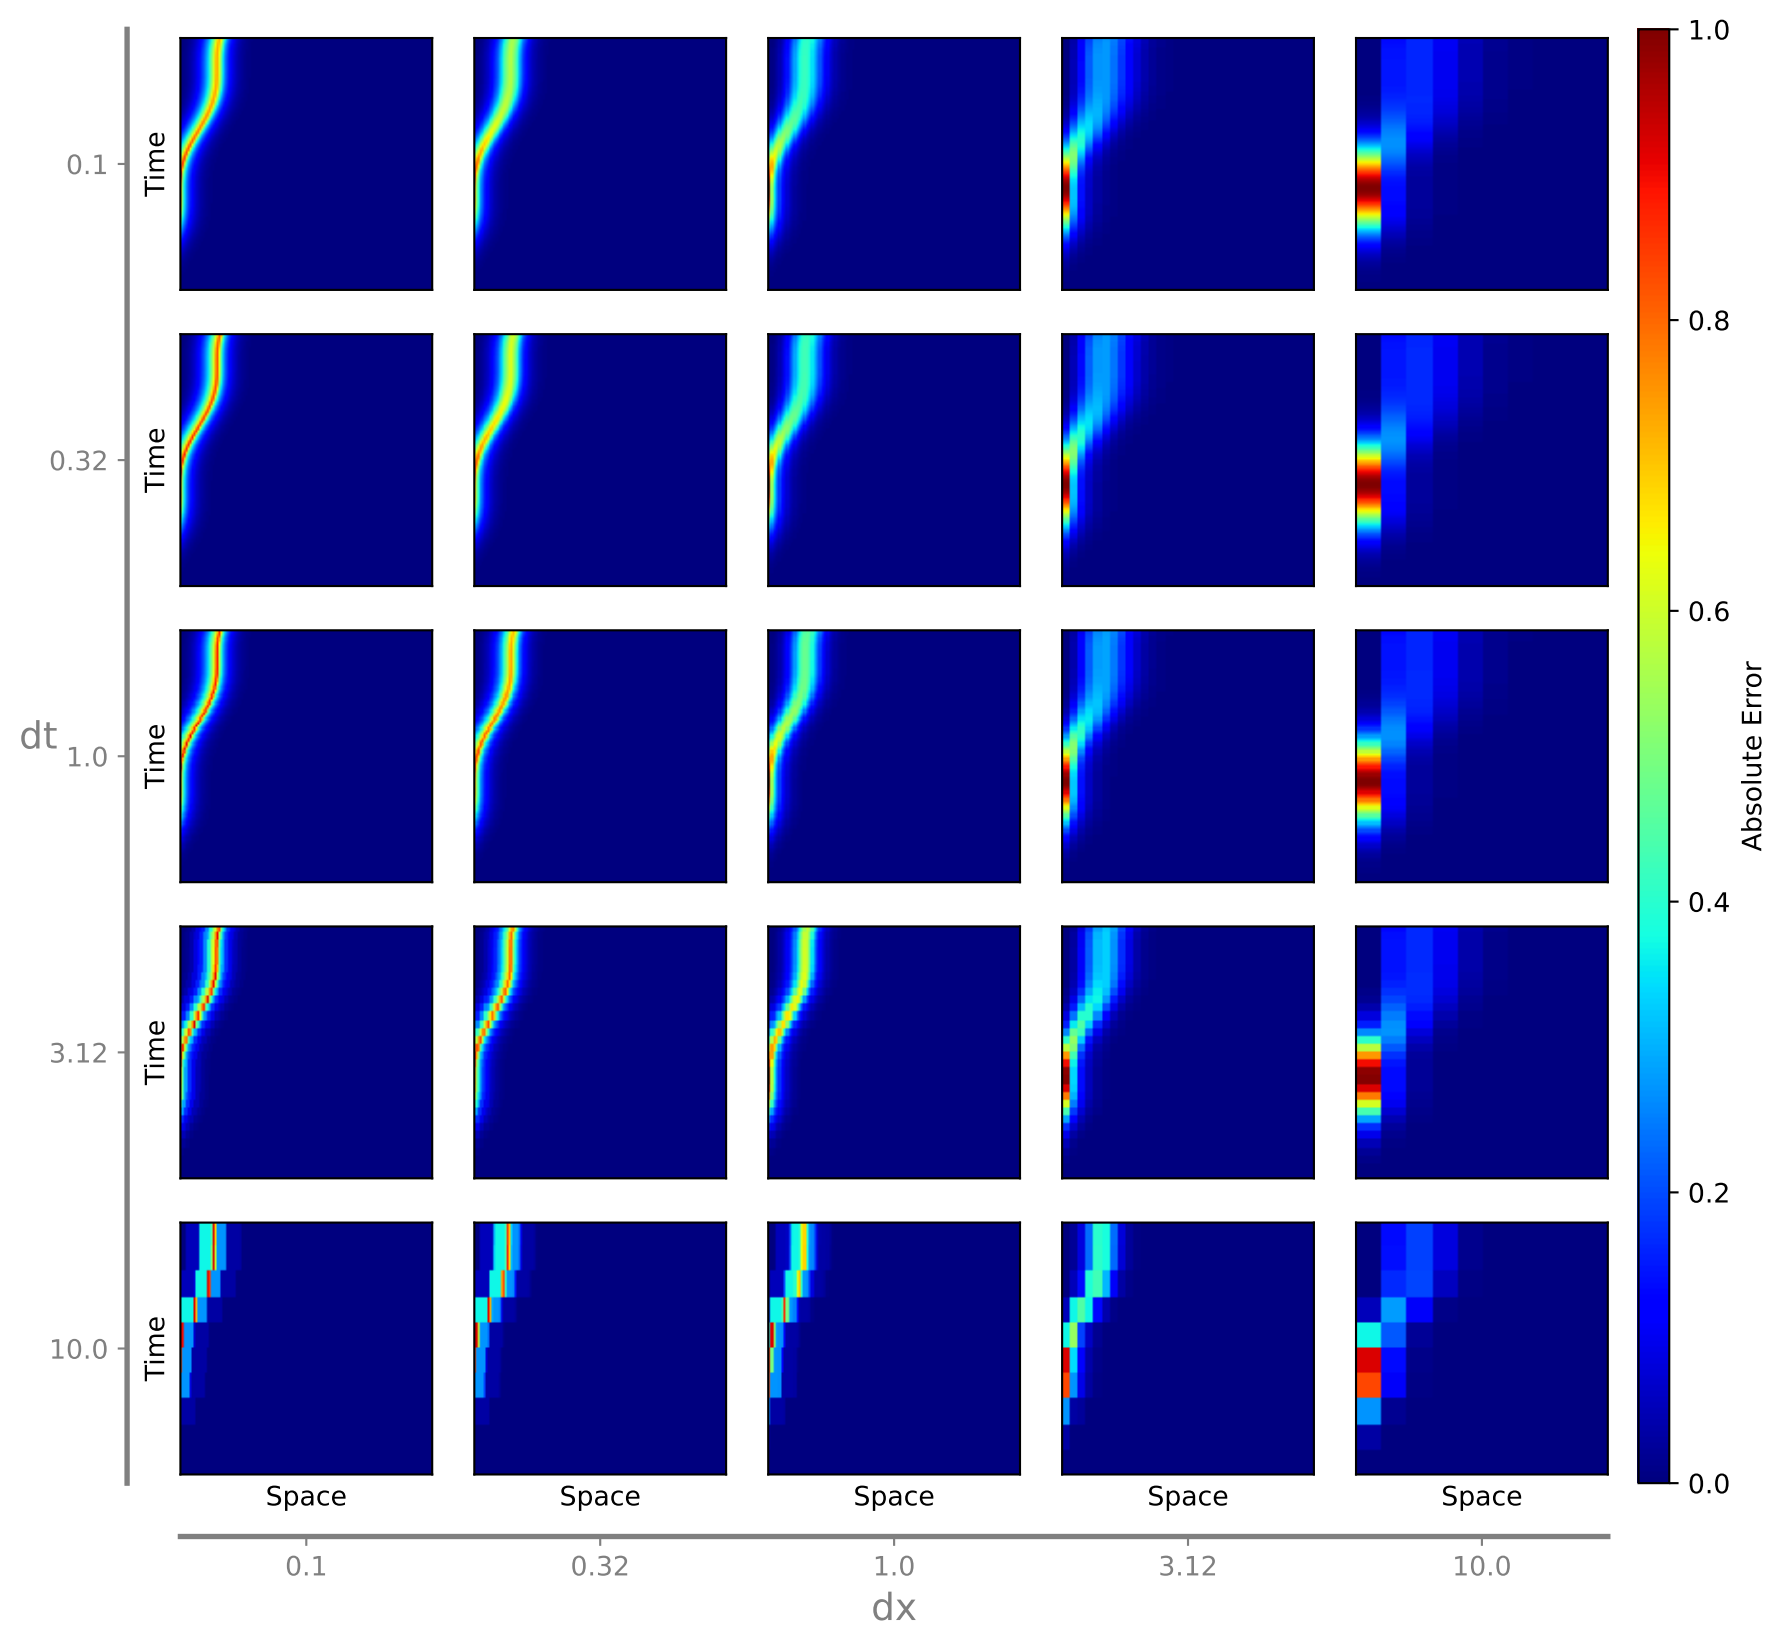

Supplement: supplementary_material [file sl_result_spacetime_varying_discretization_exp_3.pdf › mega_mp_advection_on_metric_graphs/Results/Figures/sl_result_spacetime_varying_discretization_exp_3.pdf]

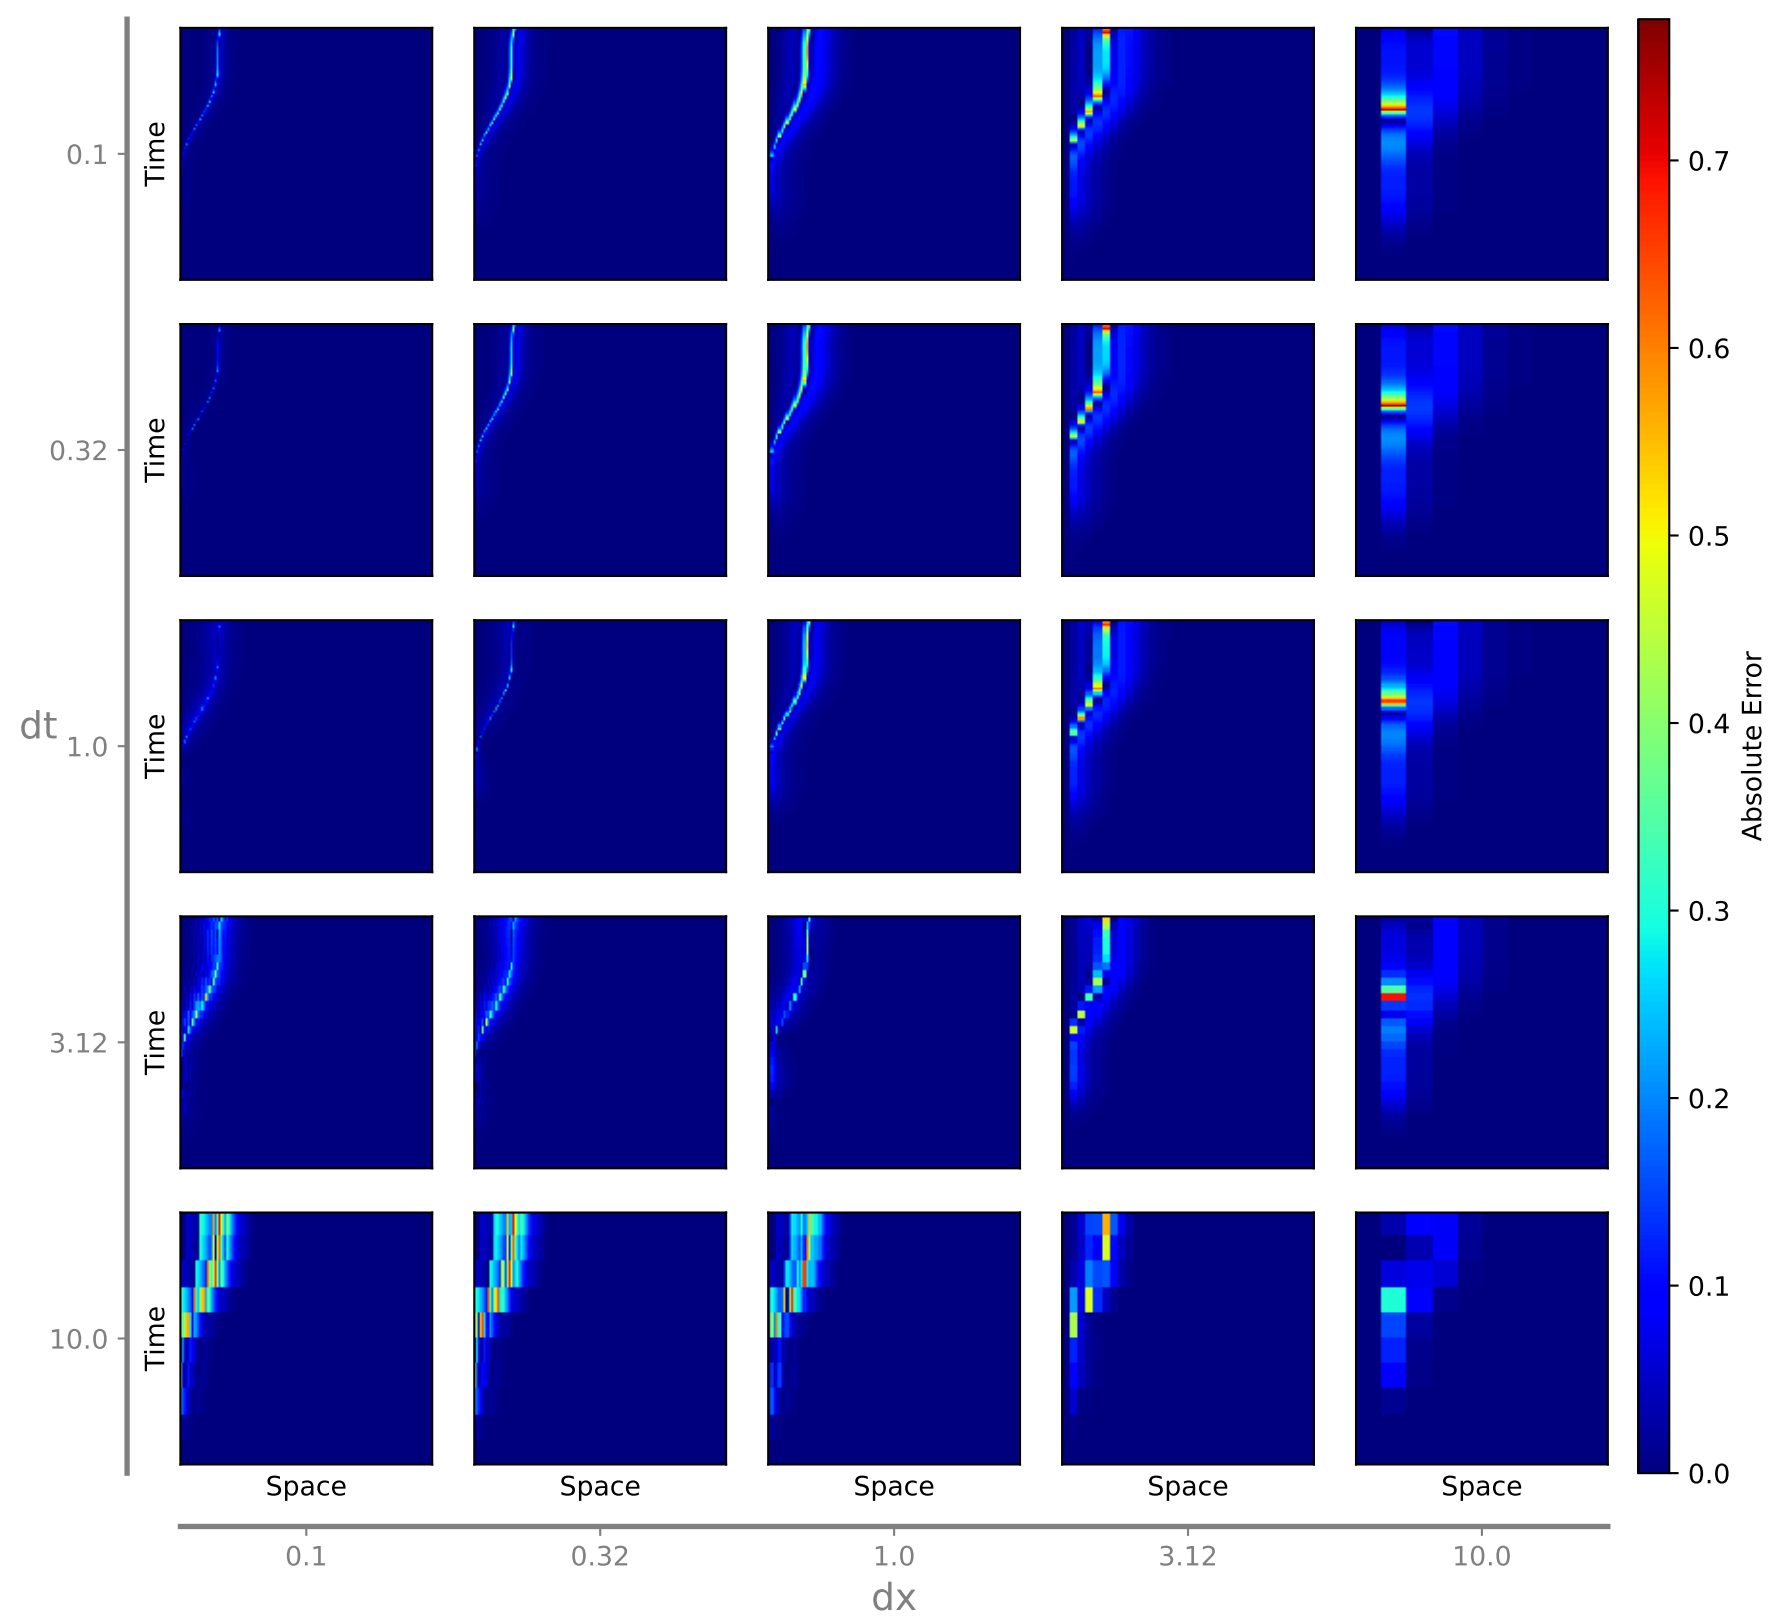

Supplement: supplementary_material [file sl_result_spacetime_varying_discretization_exp_3_absolute_error.pdf › mega_mp_advection_on_metric_graphs/Results/Figures/sl_result_spacetime_varying_discretization_exp_3_absolute_error.pdf]

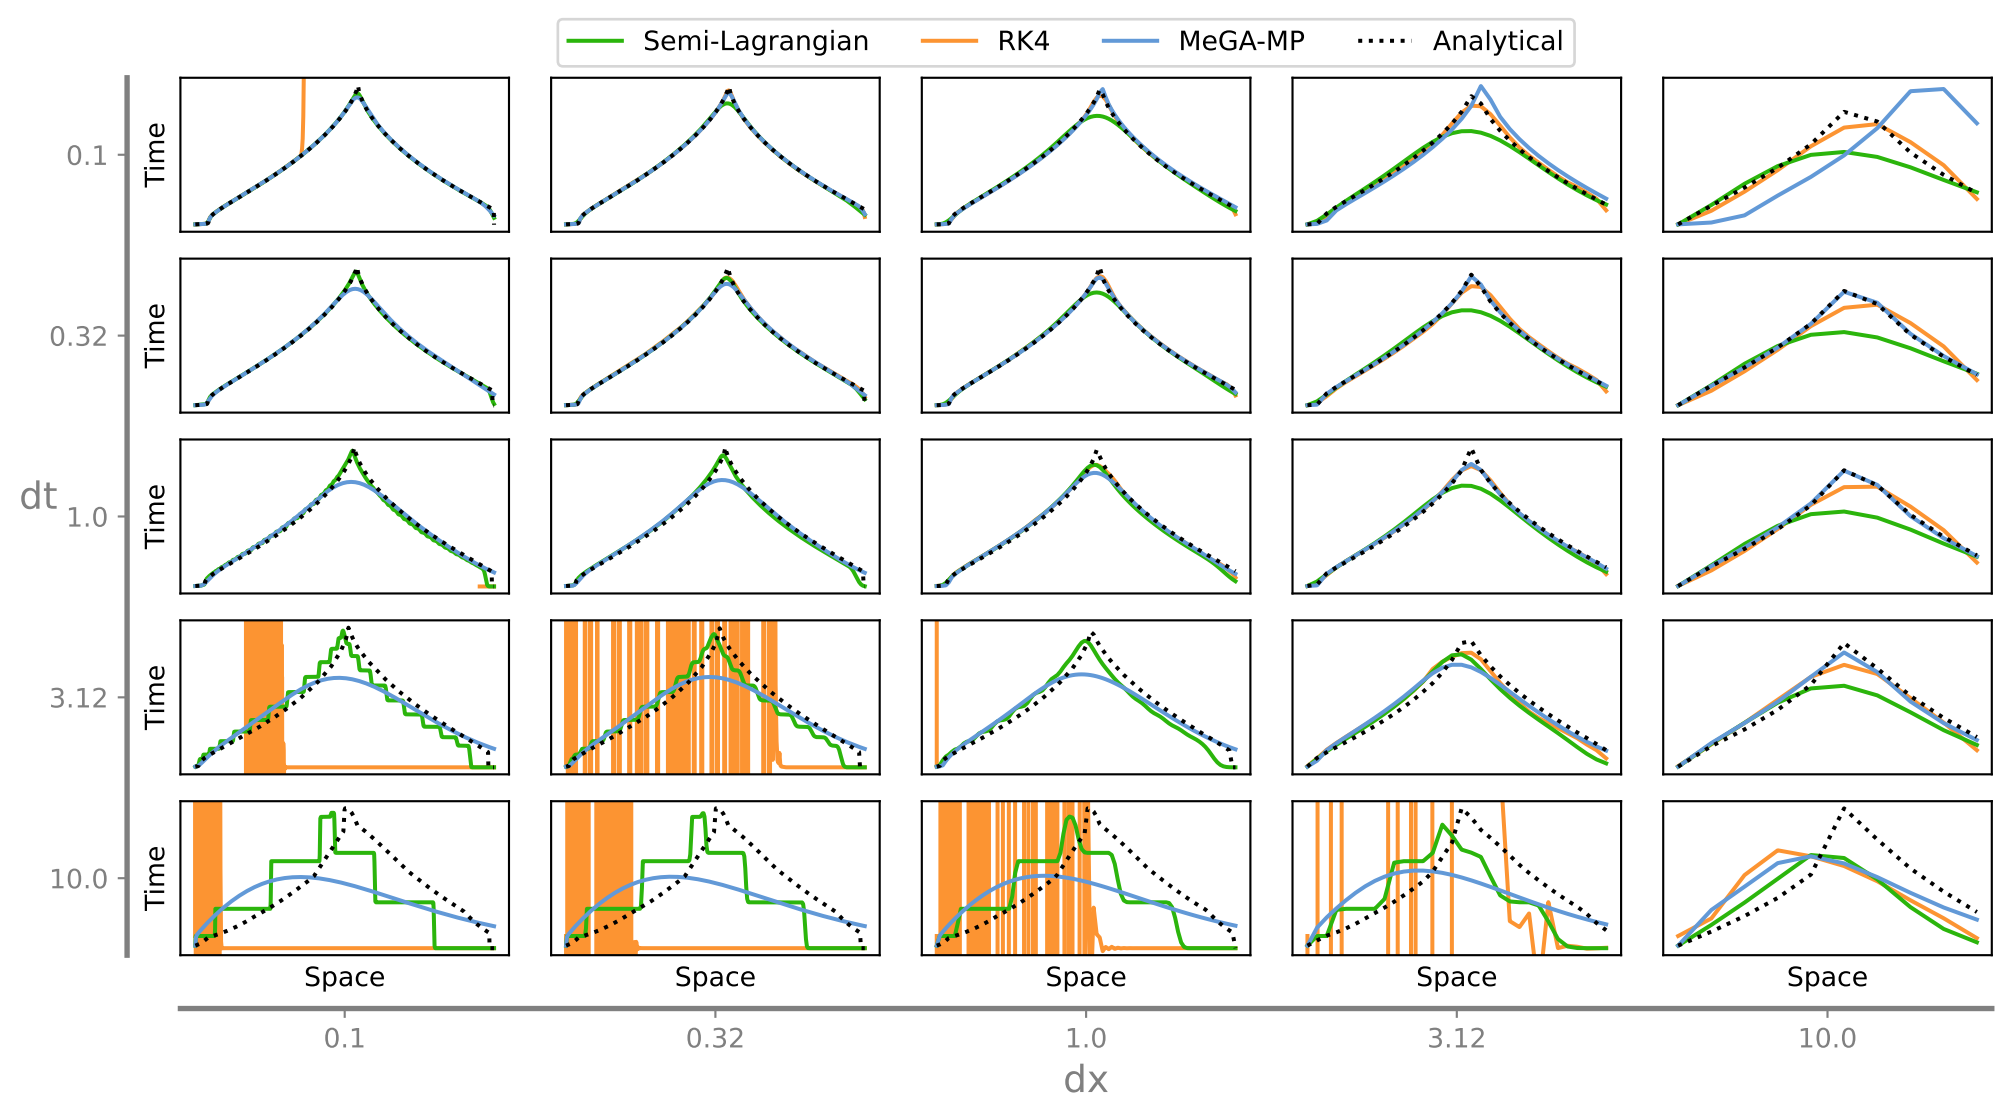

Supplement: supplementary_material [file solver_comparison_varying_discretization_exp_0.pdf › mega_mp_advection_on_metric_graphs/Results/Figures/solver_comparison_varying_discretization_exp_0.pdf]

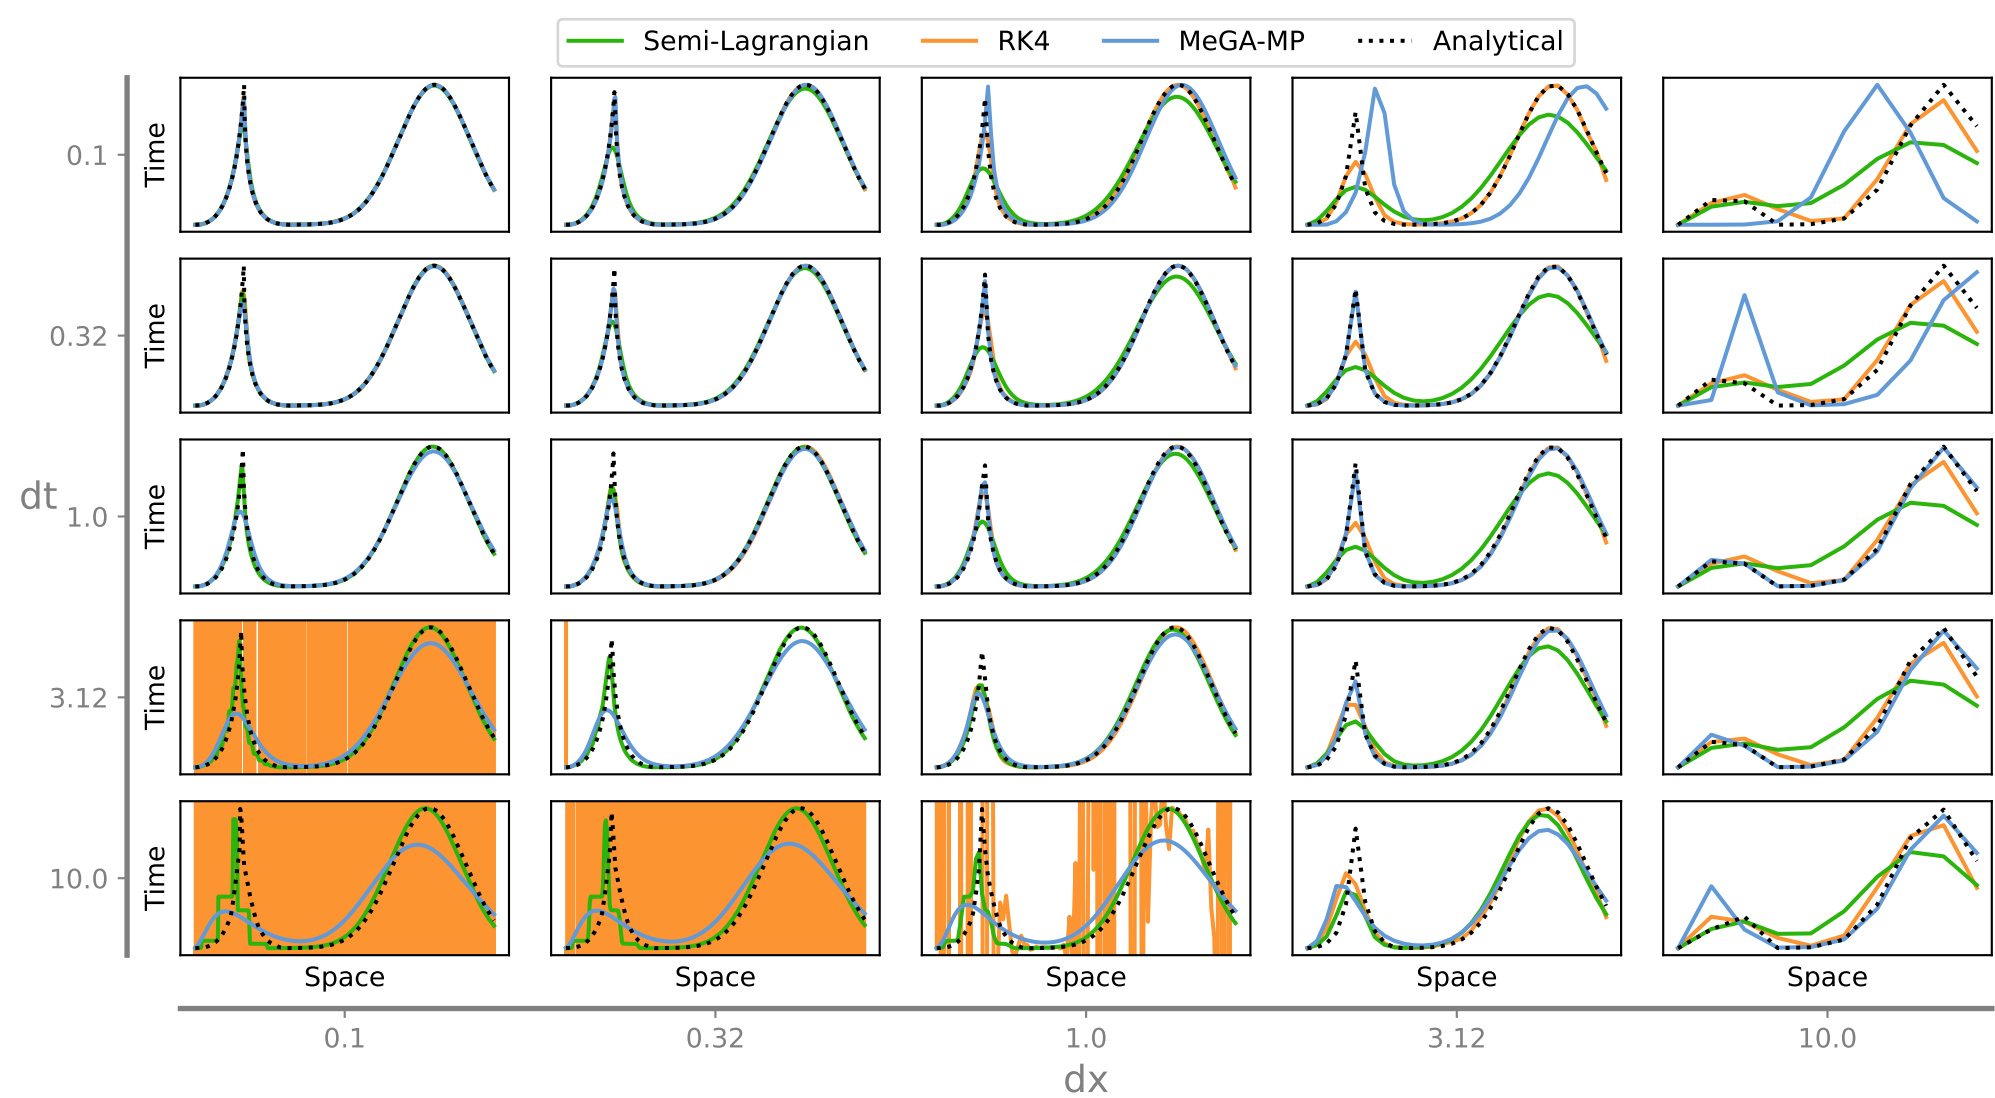

Supplement: supplementary_material [file solver_comparison_varying_discretization_exp_1.pdf › mega_mp_advection_on_metric_graphs/Results/Figures/solver_comparison_varying_discretization_exp_1.pdf]

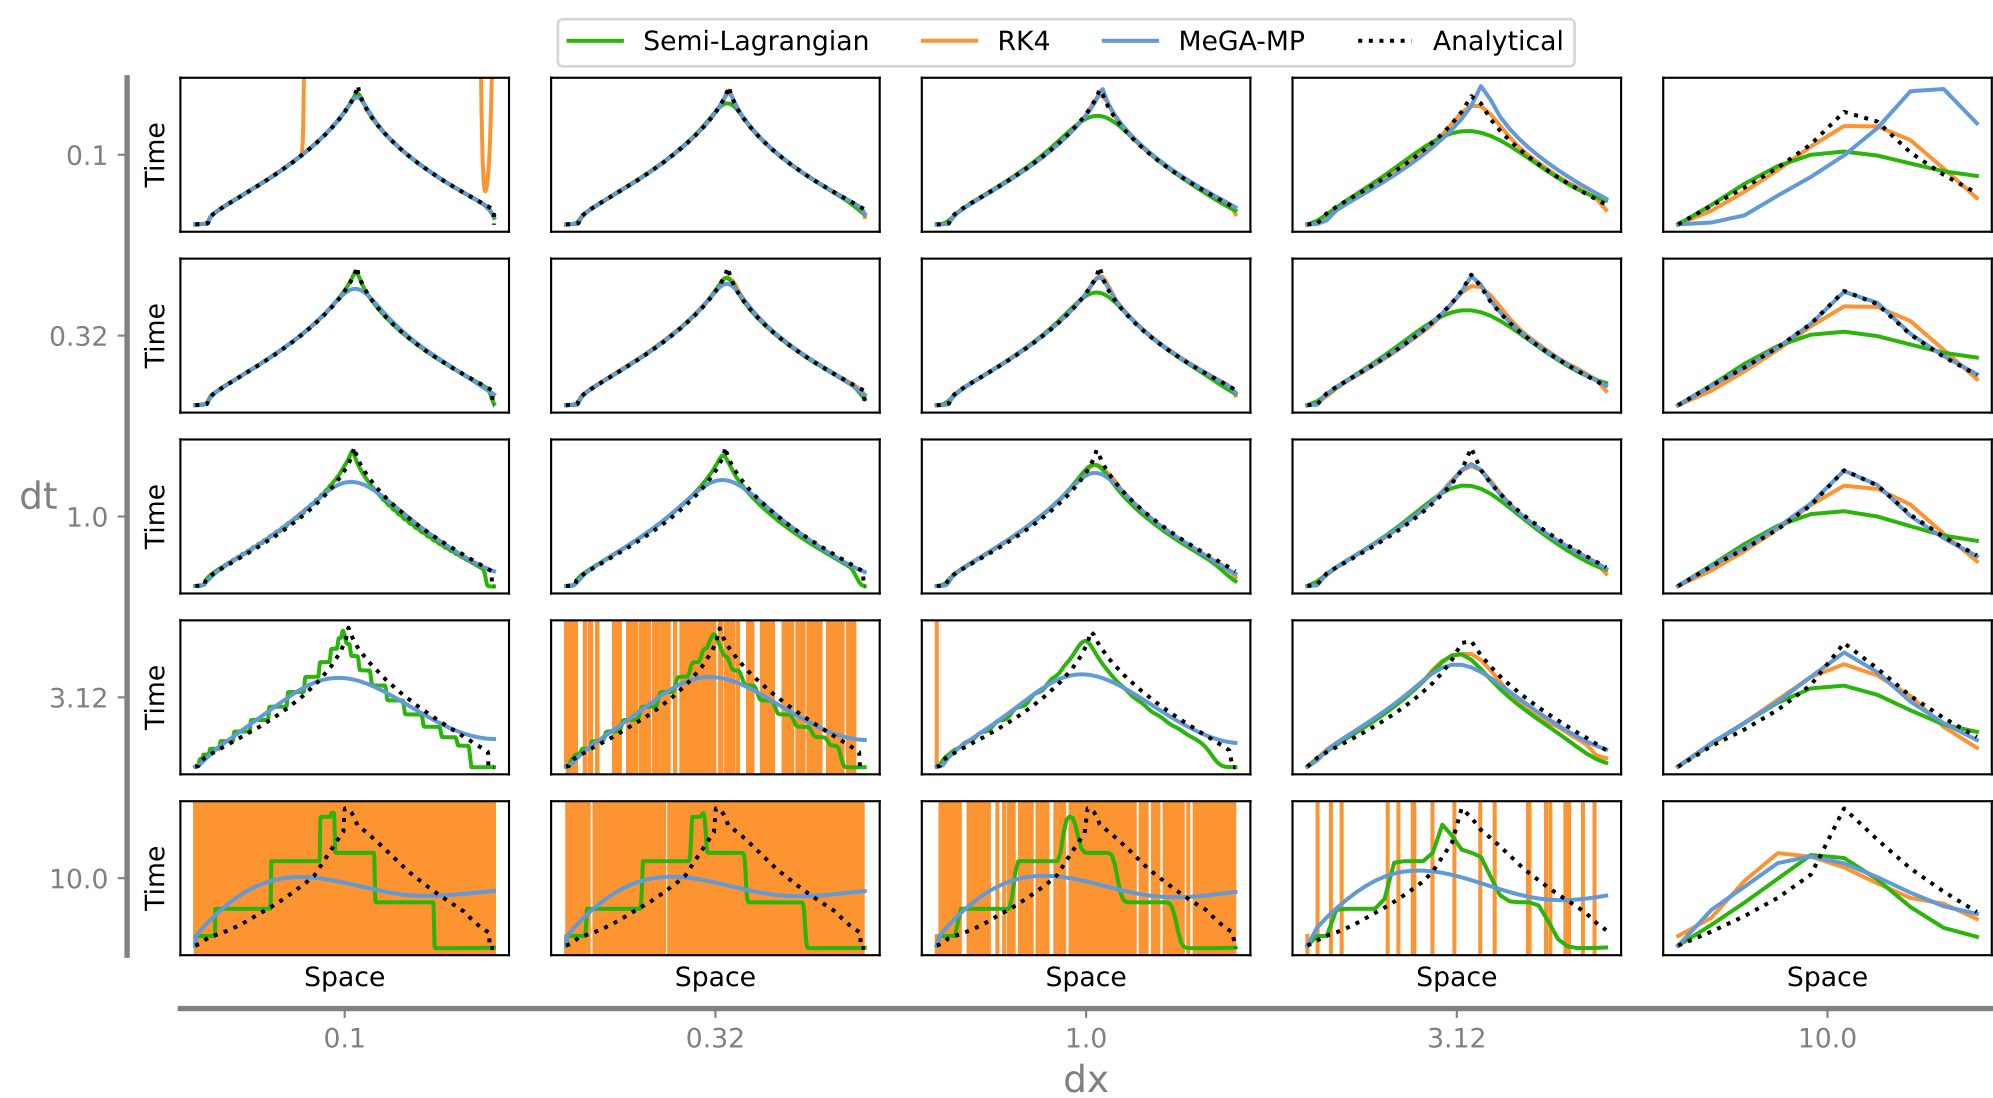

Supplement: supplementary_material [file solver_comparison_varying_discretization_exp_2.pdf › mega_mp_advection_on_metric_graphs/Results/Figures/solver_comparison_varying_discretization_exp_2.pdf]

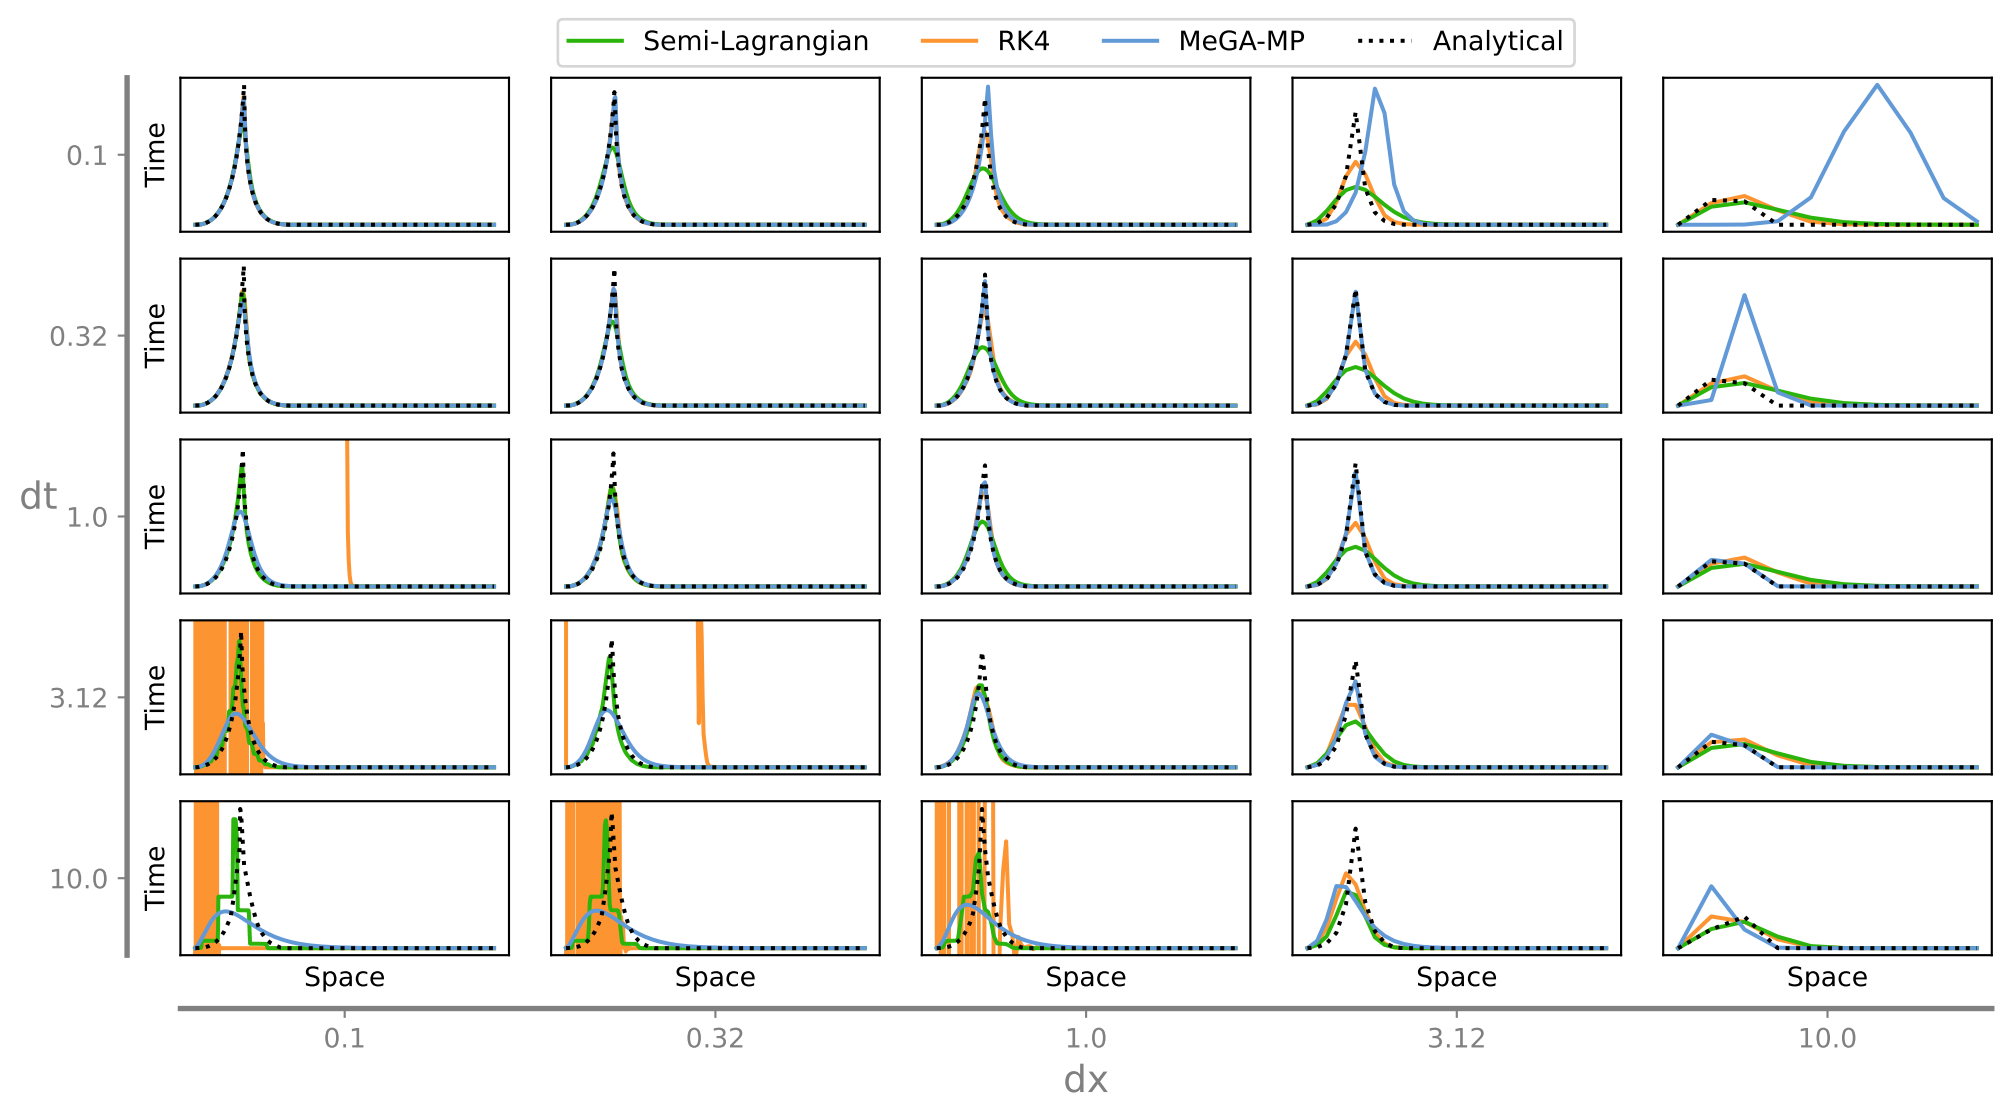

Supplement: supplementary_material [file solver_comparison_varying_discretization_exp_3.pdf › mega_mp_advection_on_metric_graphs/Results/Figures/solver_comparison_varying_discretization_exp_3.pdf]

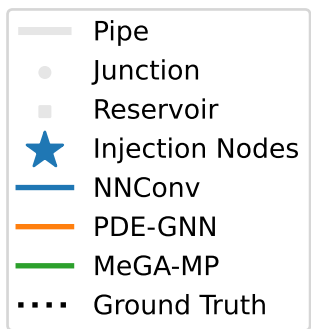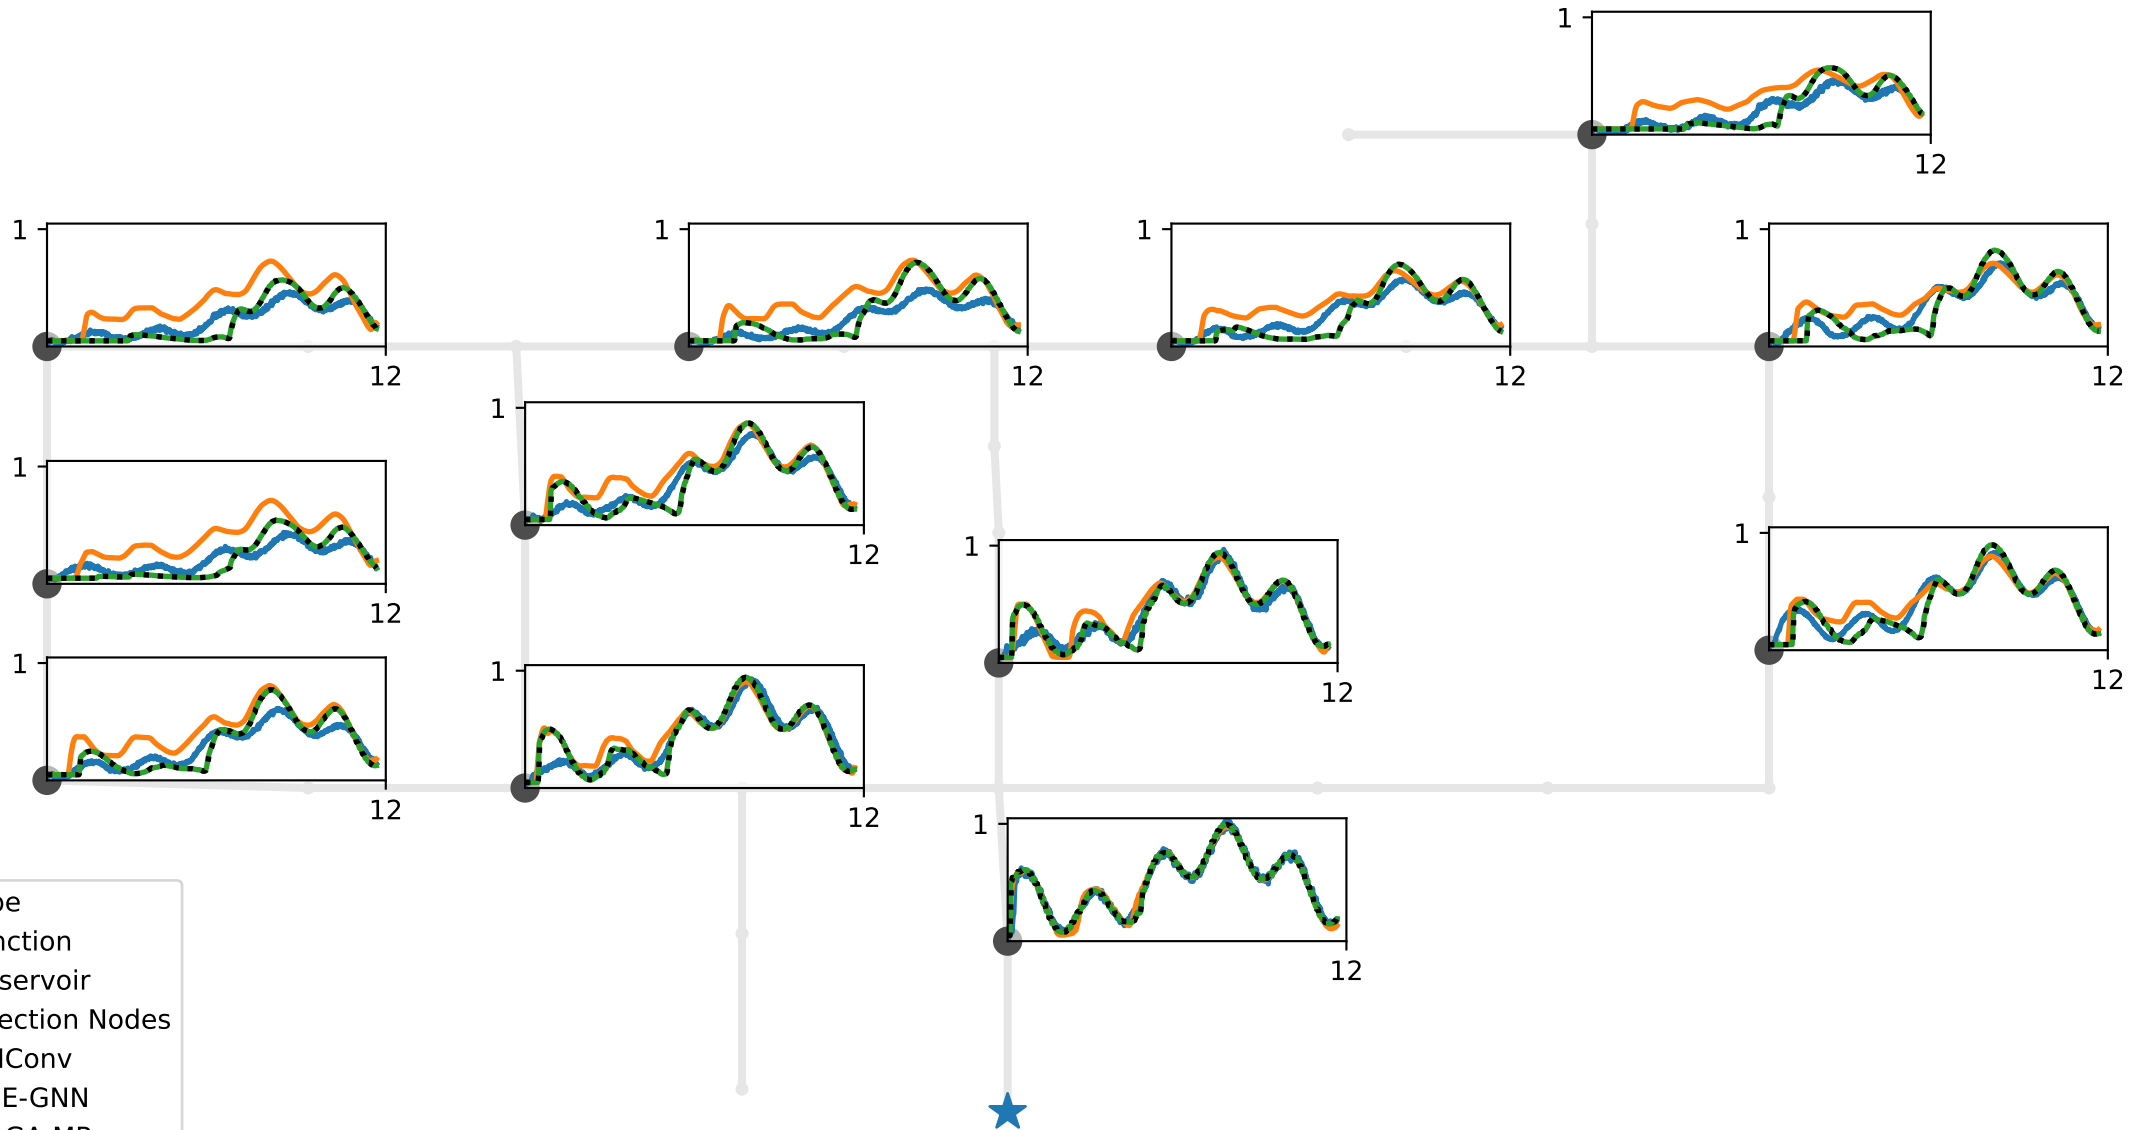

Supplement: supplementary_material [file Hanoi_advection_reaction_on_map.pdf › mega_mp_advection_on_metric_graphs/Results/learning_reactions/experiment_0/Hanoi_advection_reaction_on_map.pdf]

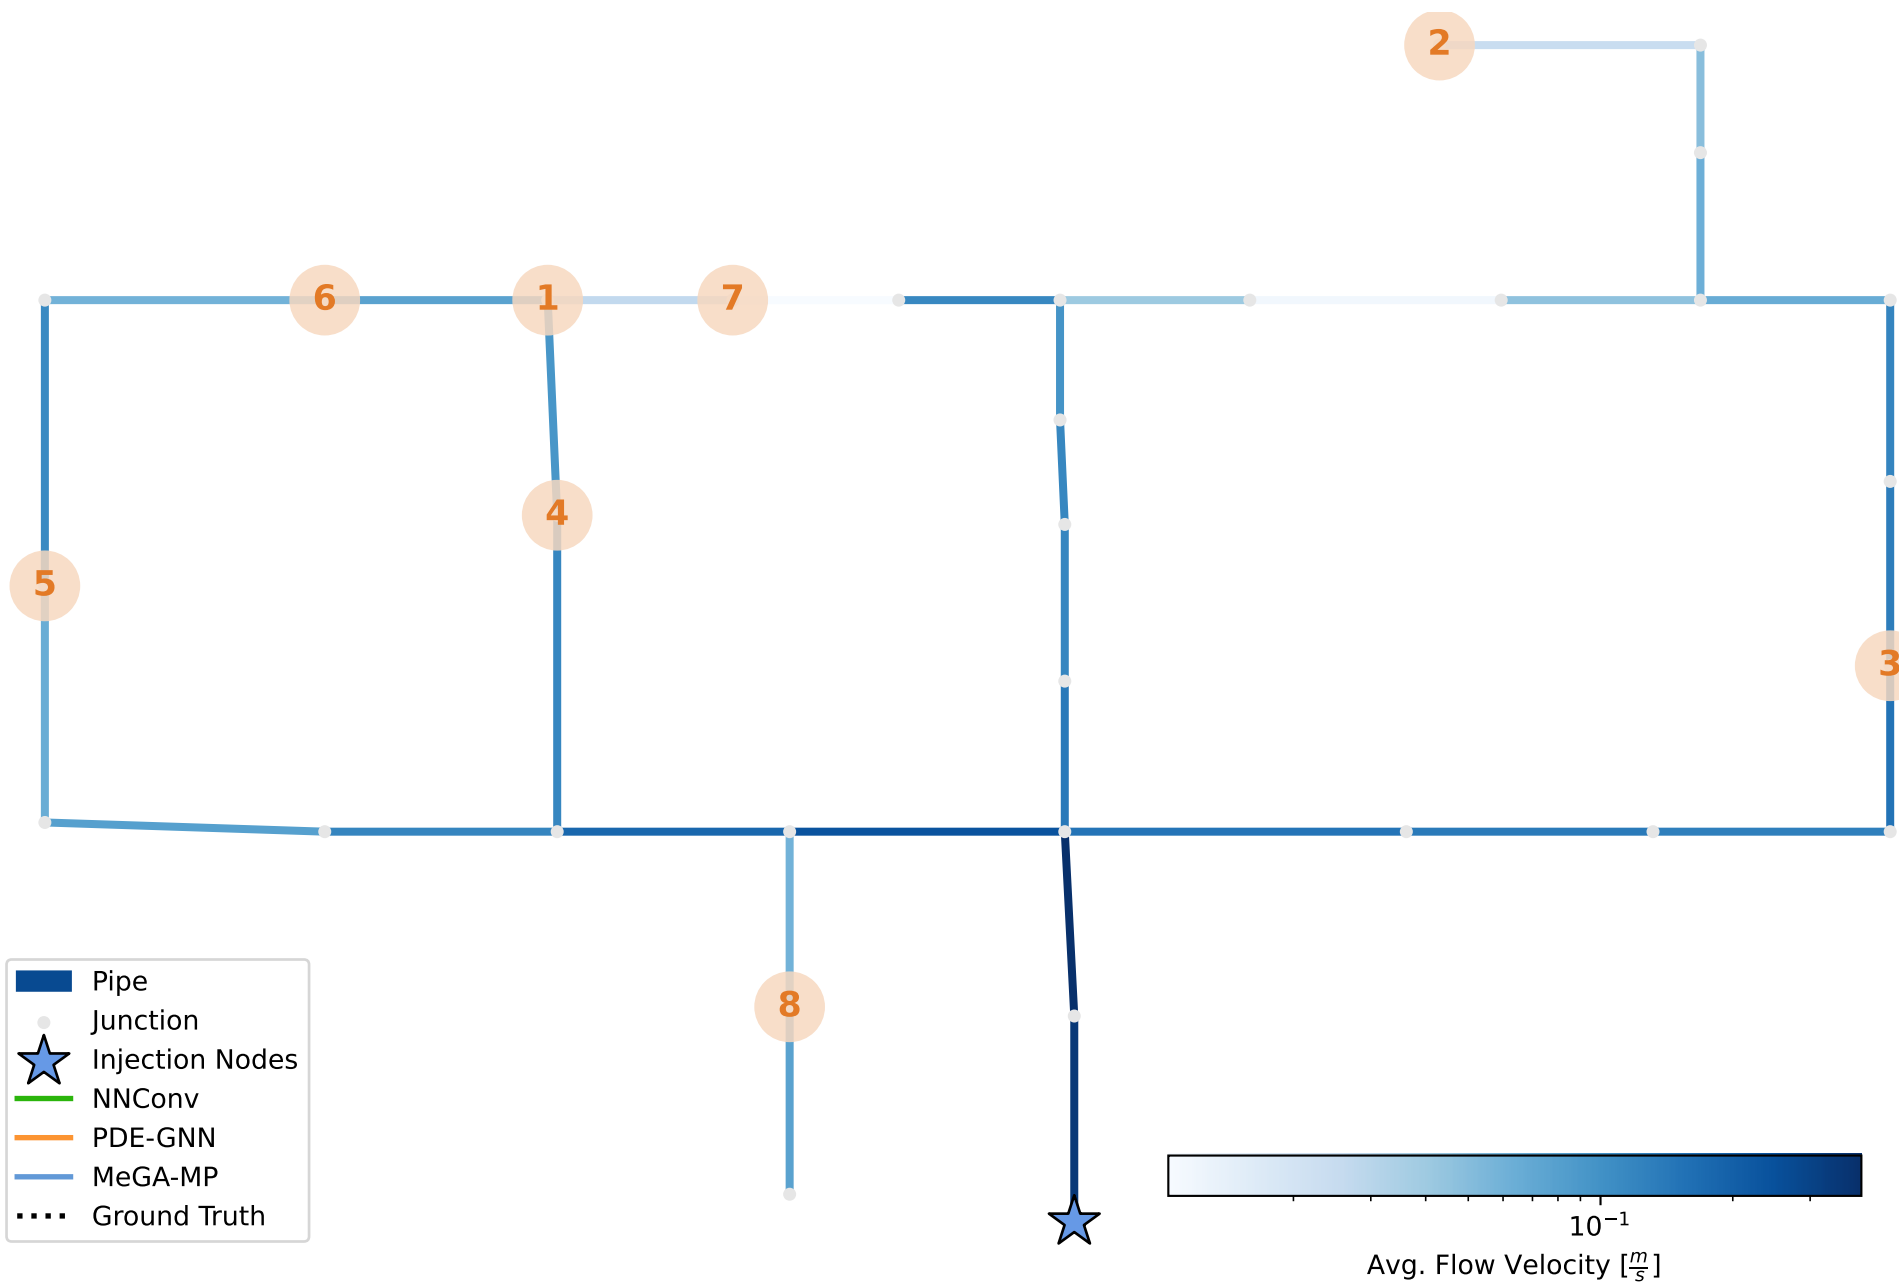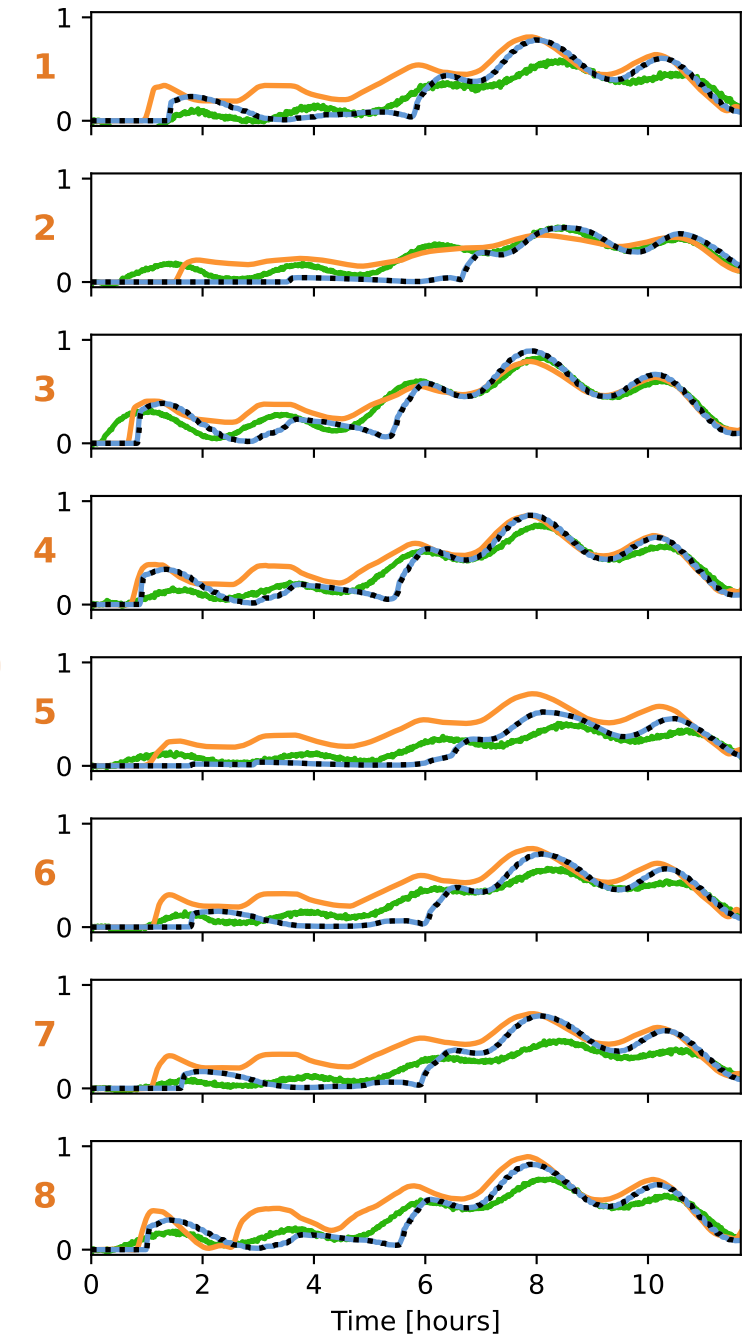

Supplement: supplementary_material [file Hanoi_advection_reaction_with_map.pdf › mega_mp_advection_on_metric_graphs/Results/learning_reactions/experiment_0/Hanoi_advection_reaction_with_map.pdf]

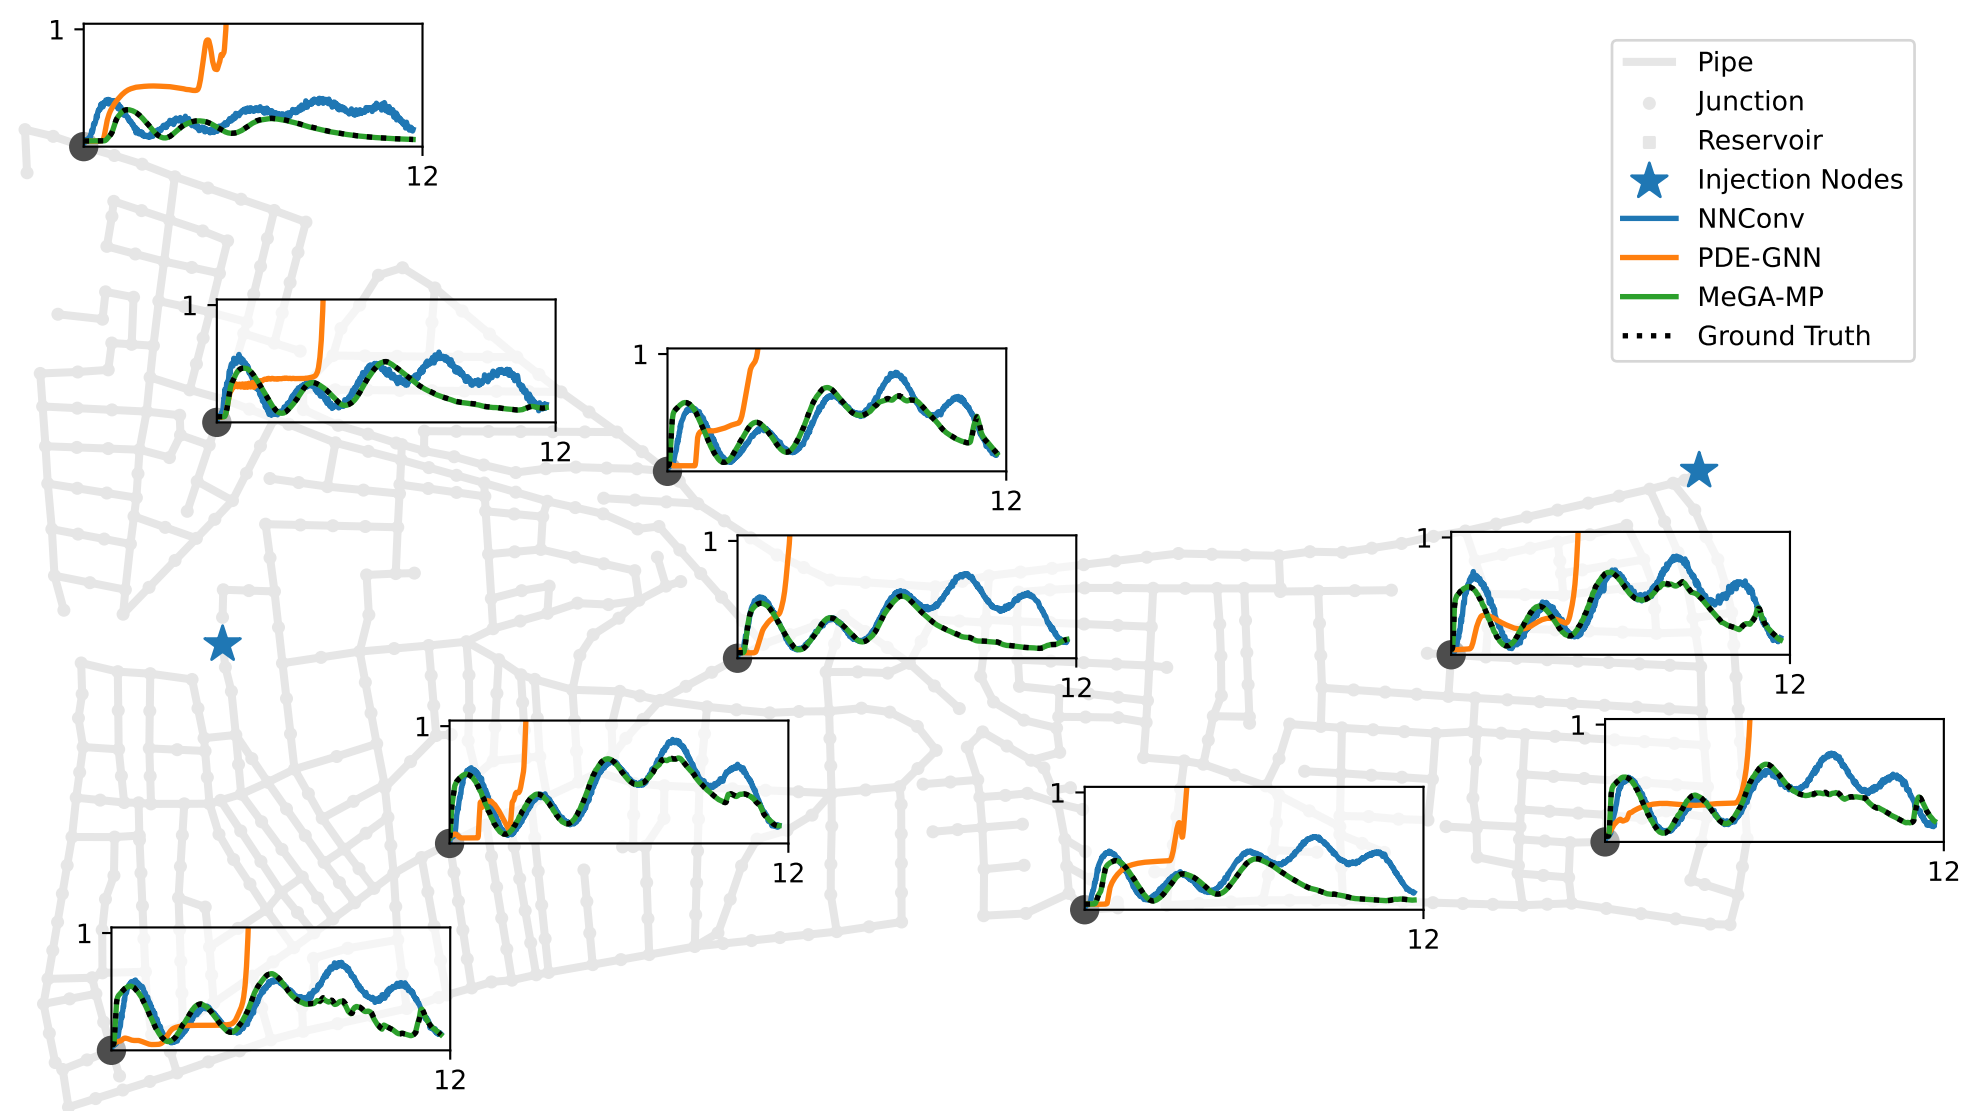

Supplement: supplementary_material [file L-Town_advection_reaction_on_map.pdf › mega_mp_advection_on_metric_graphs/Results/learning_reactions/experiment_0/L-Town_advection_reaction_on_map.pdf]

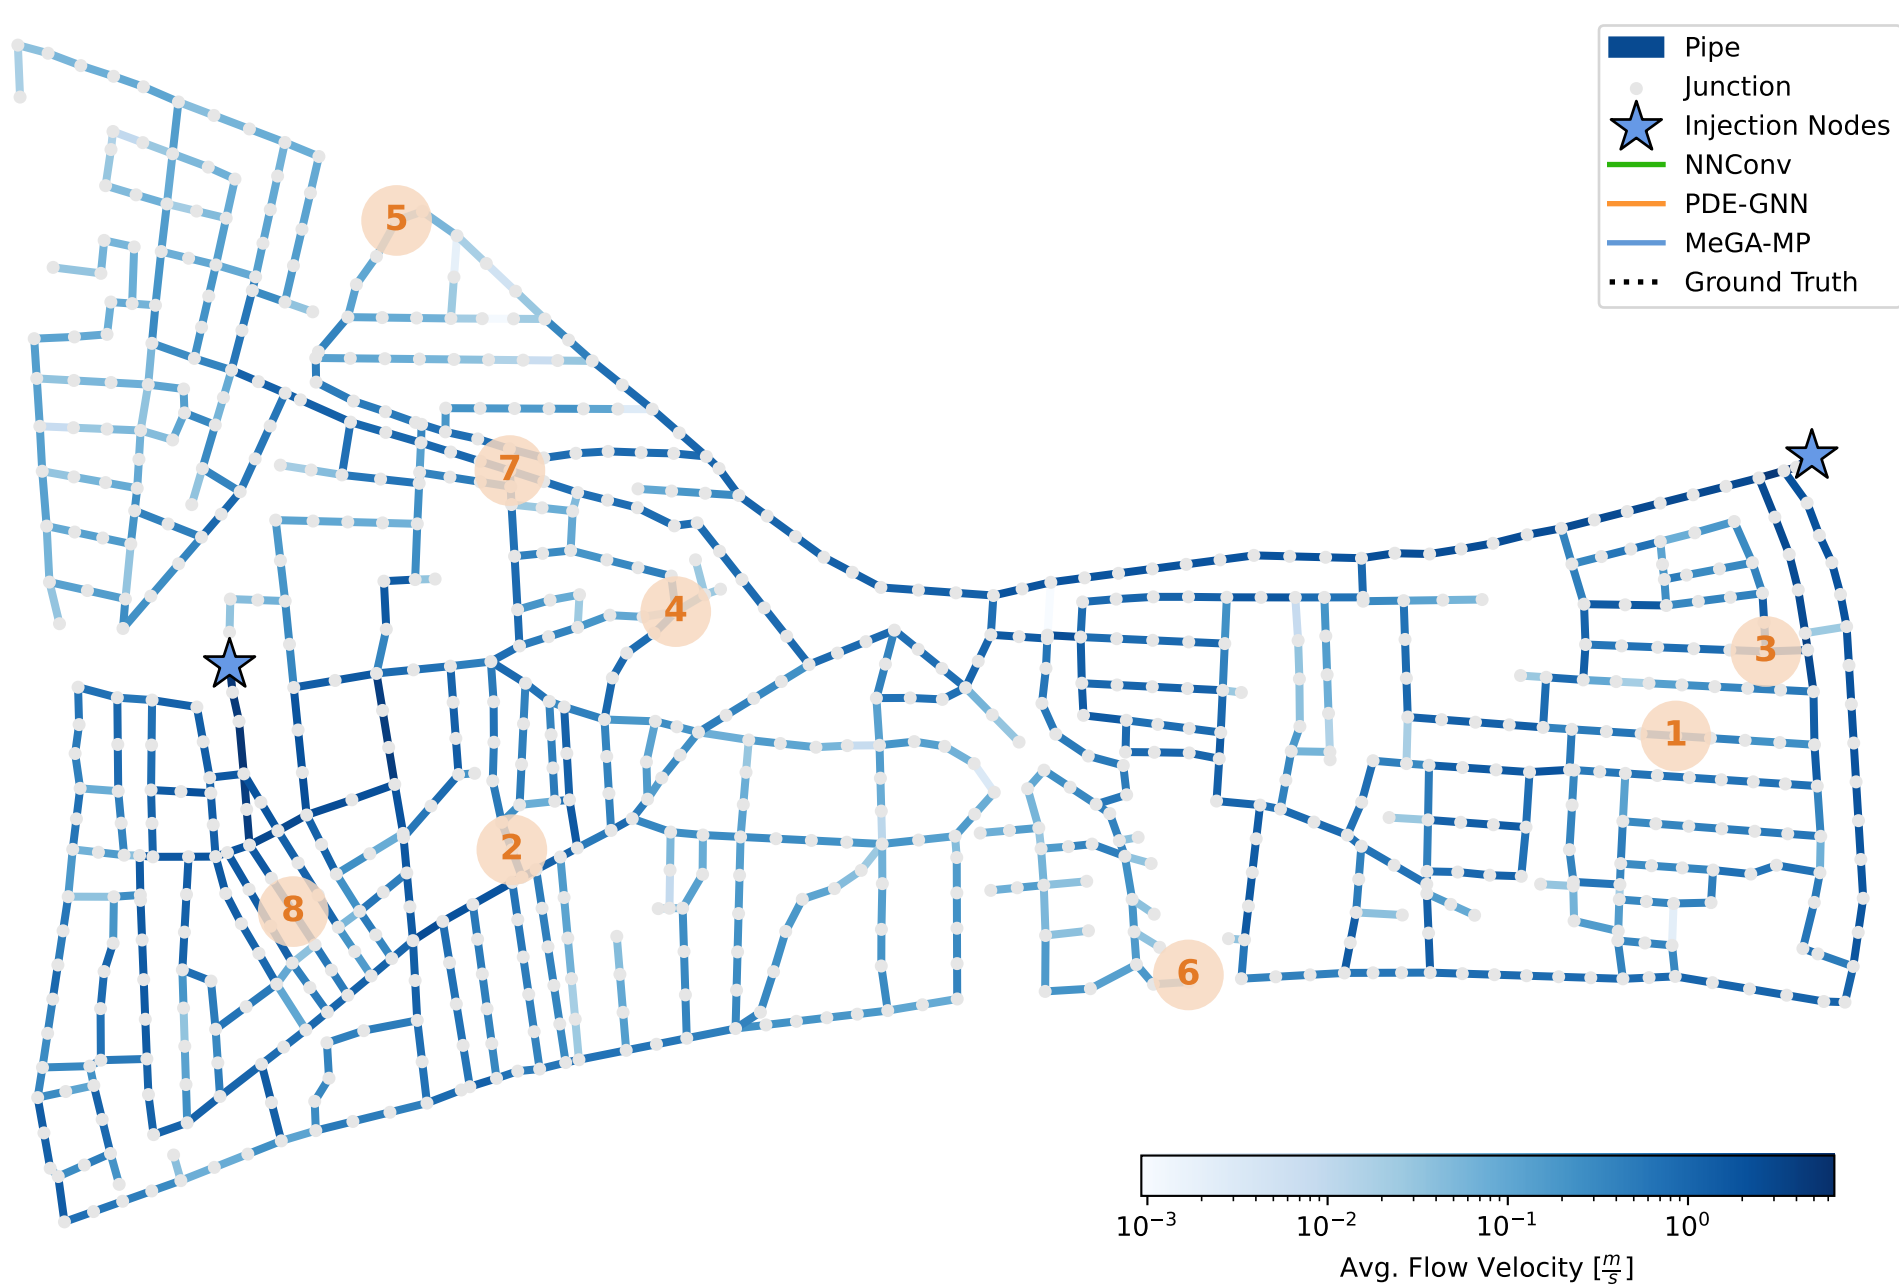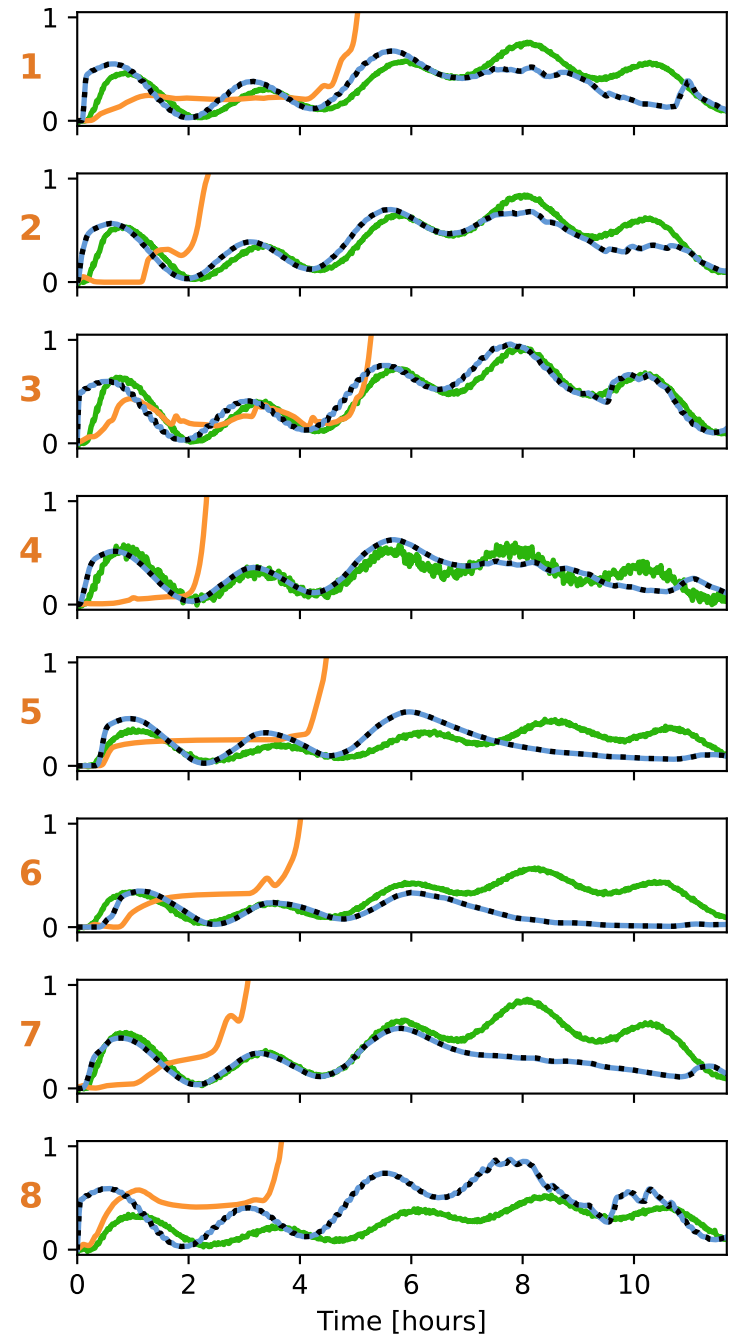

Supplement: supplementary_material [file L-Town_advection_reaction_with_map.pdf › mega_mp_advection_on_metric_graphs/Results/learning_reactions/experiment_0/L-Town_advection_reaction_with_map.pdf]

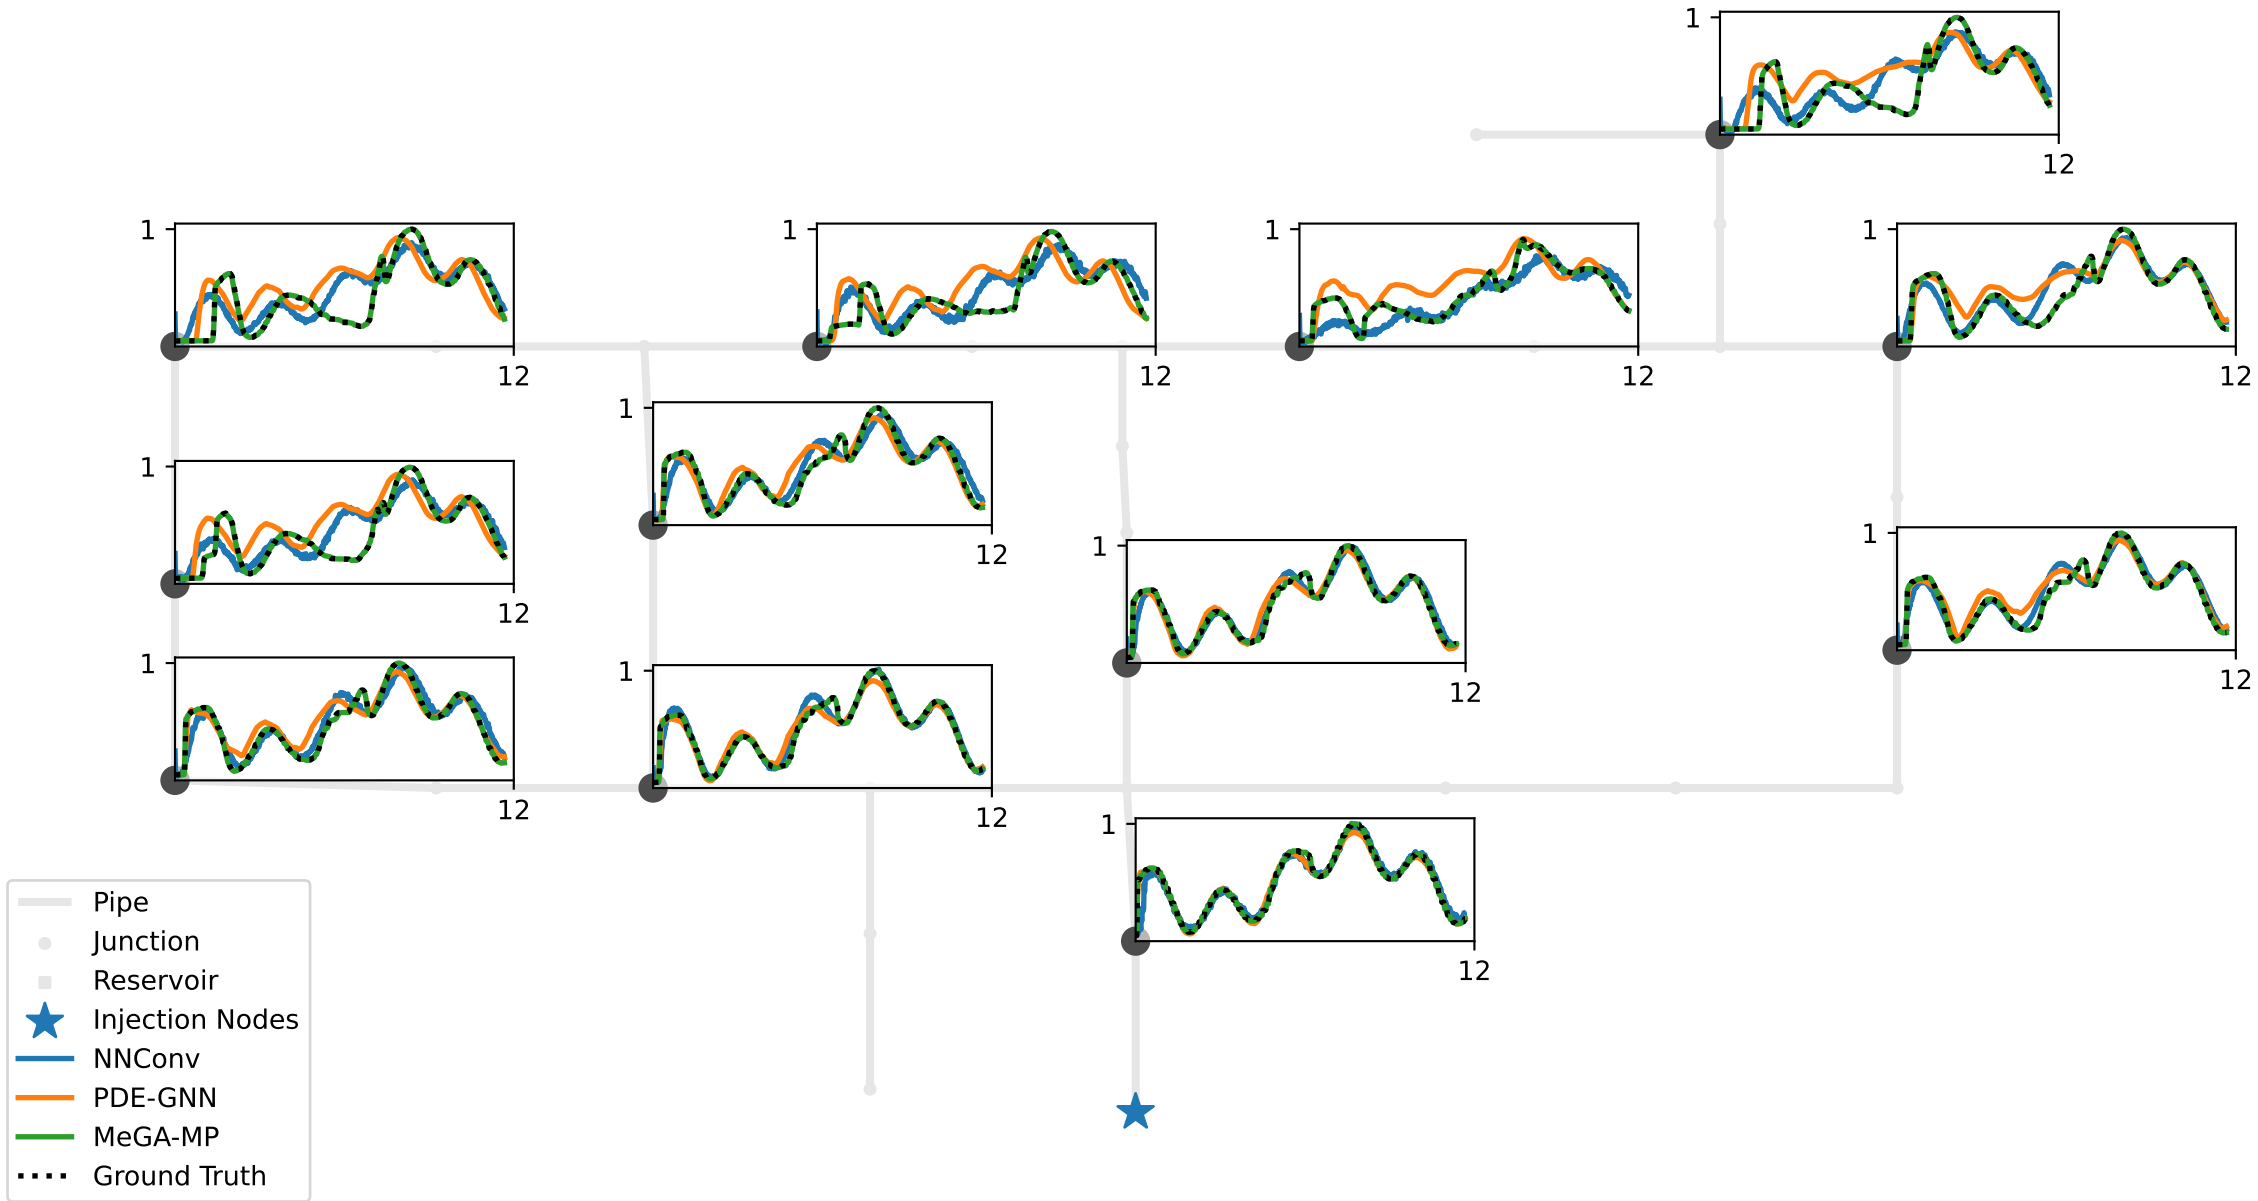

Supplement: supplementary_material [file Hanoi_advection_reaction_on_map.pdf › mega_mp_advection_on_metric_graphs/Results/learning_reactions/experiment_1/Hanoi_advection_reaction_on_map.pdf]

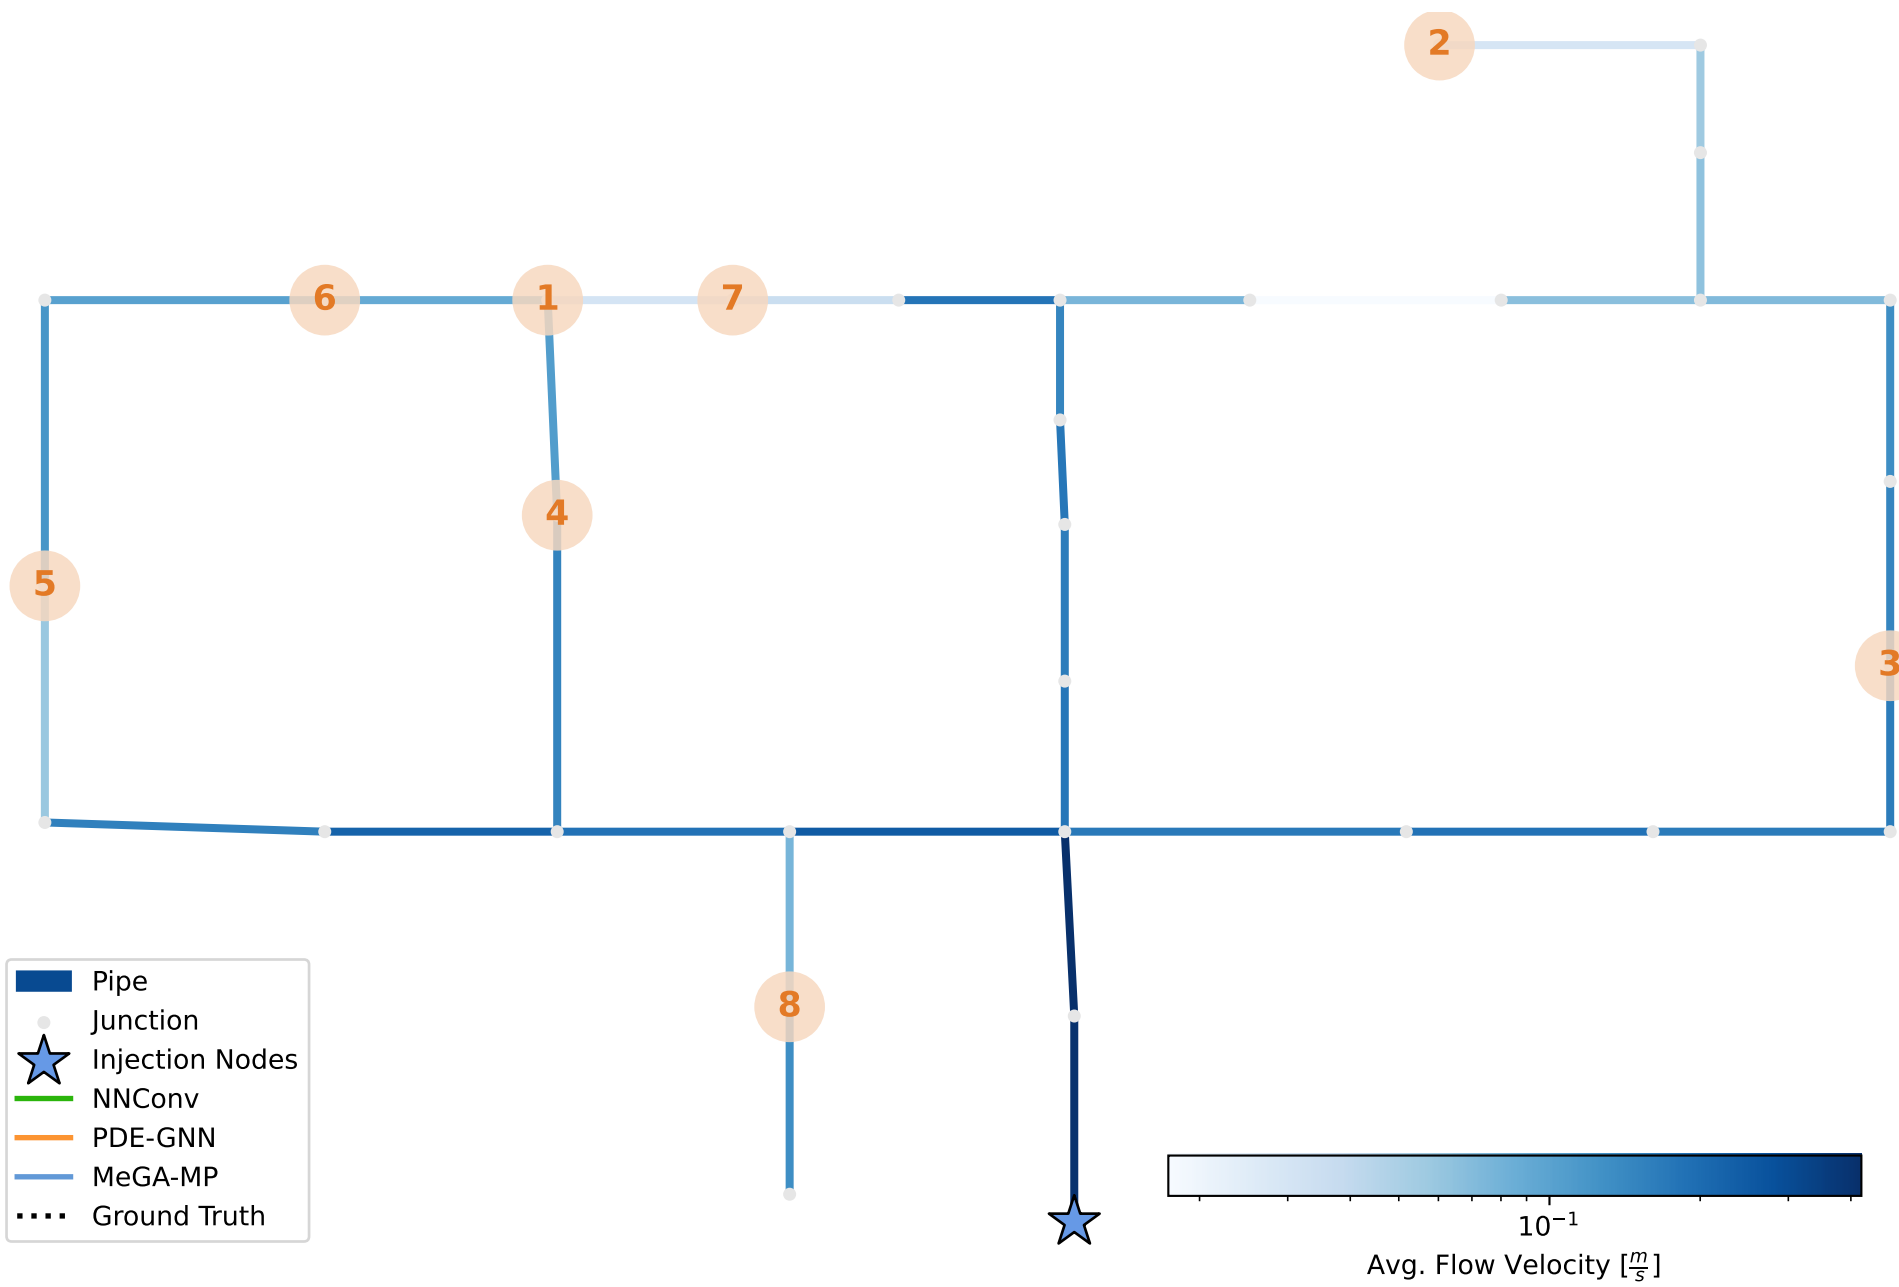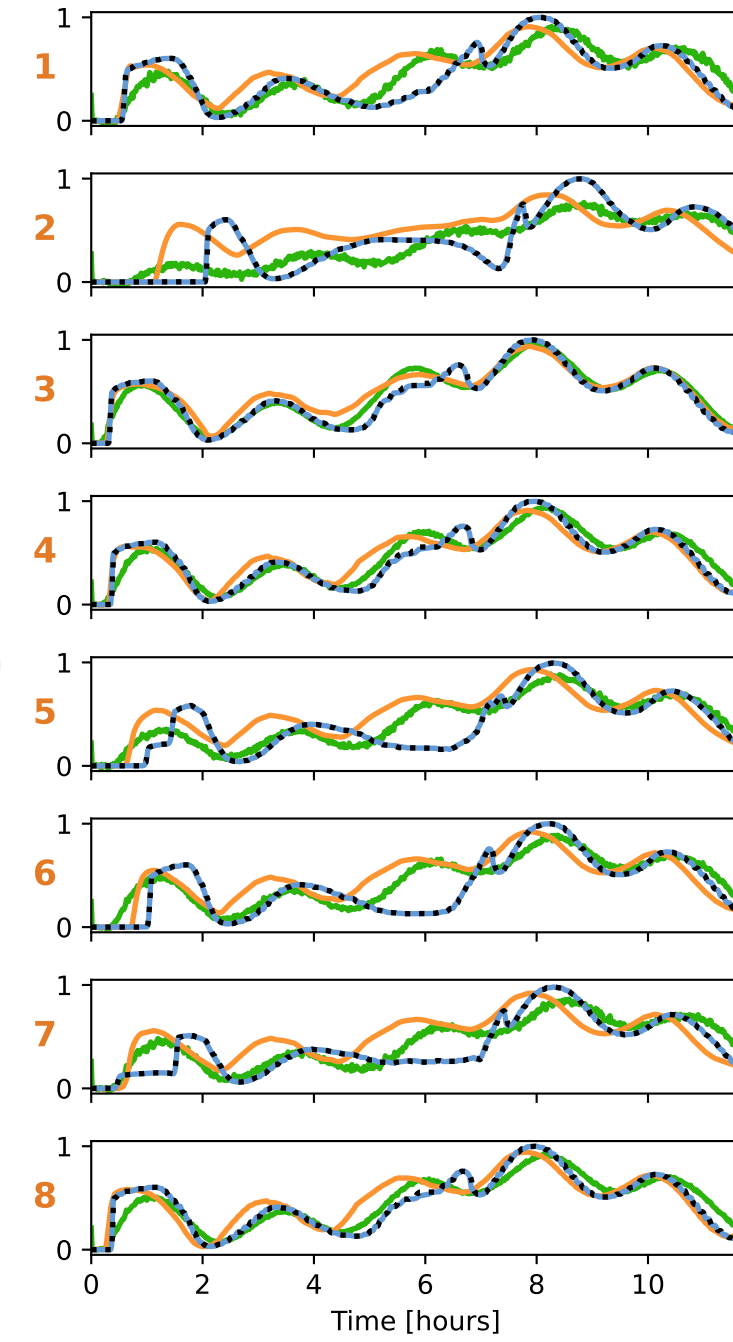

Supplement: supplementary_material [file Hanoi_advection_reaction_with_map.pdf › mega_mp_advection_on_metric_graphs/Results/learning_reactions/experiment_1/Hanoi_advection_reaction_with_map.pdf]

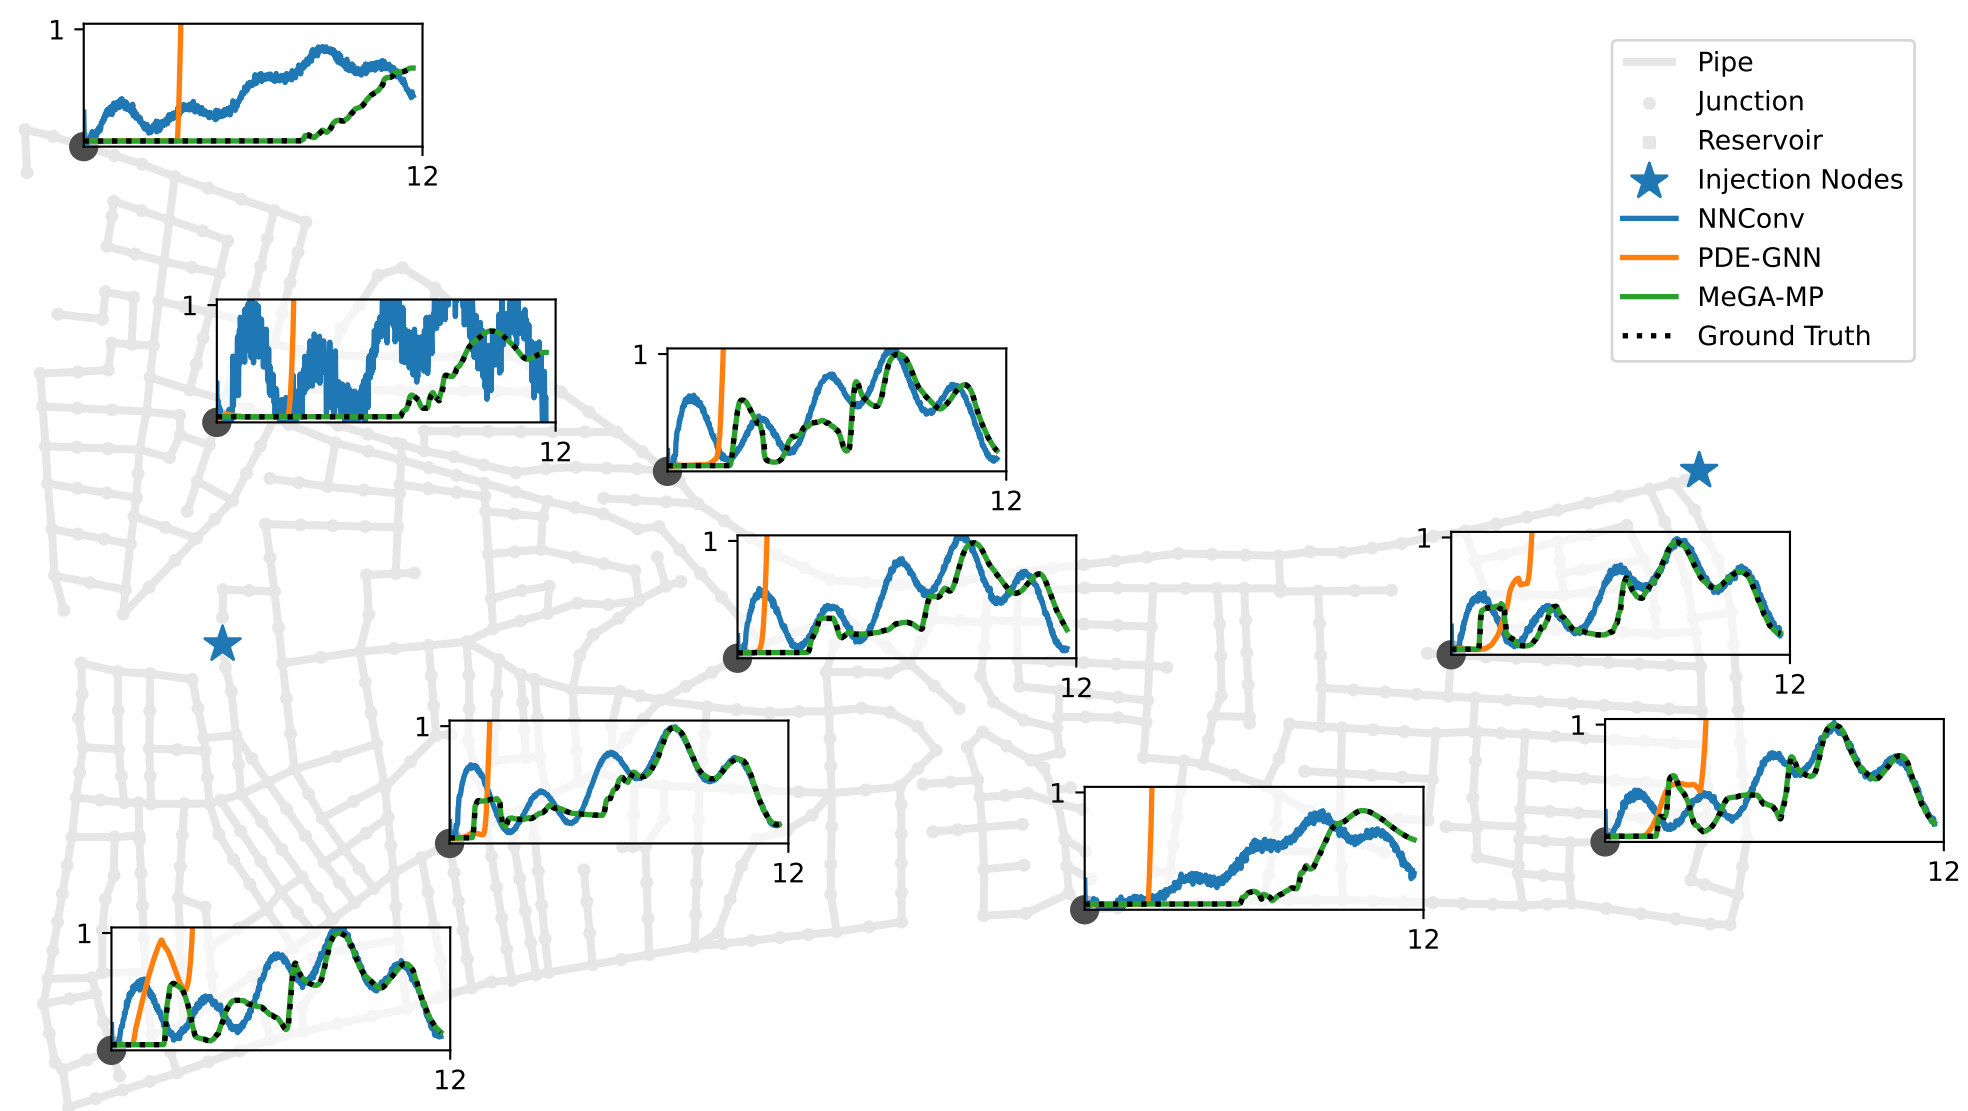

Supplement: supplementary_material [file L-Town_advection_reaction_on_map.pdf › mega_mp_advection_on_metric_graphs/Results/learning_reactions/experiment_1/L-Town_advection_reaction_on_map.pdf]

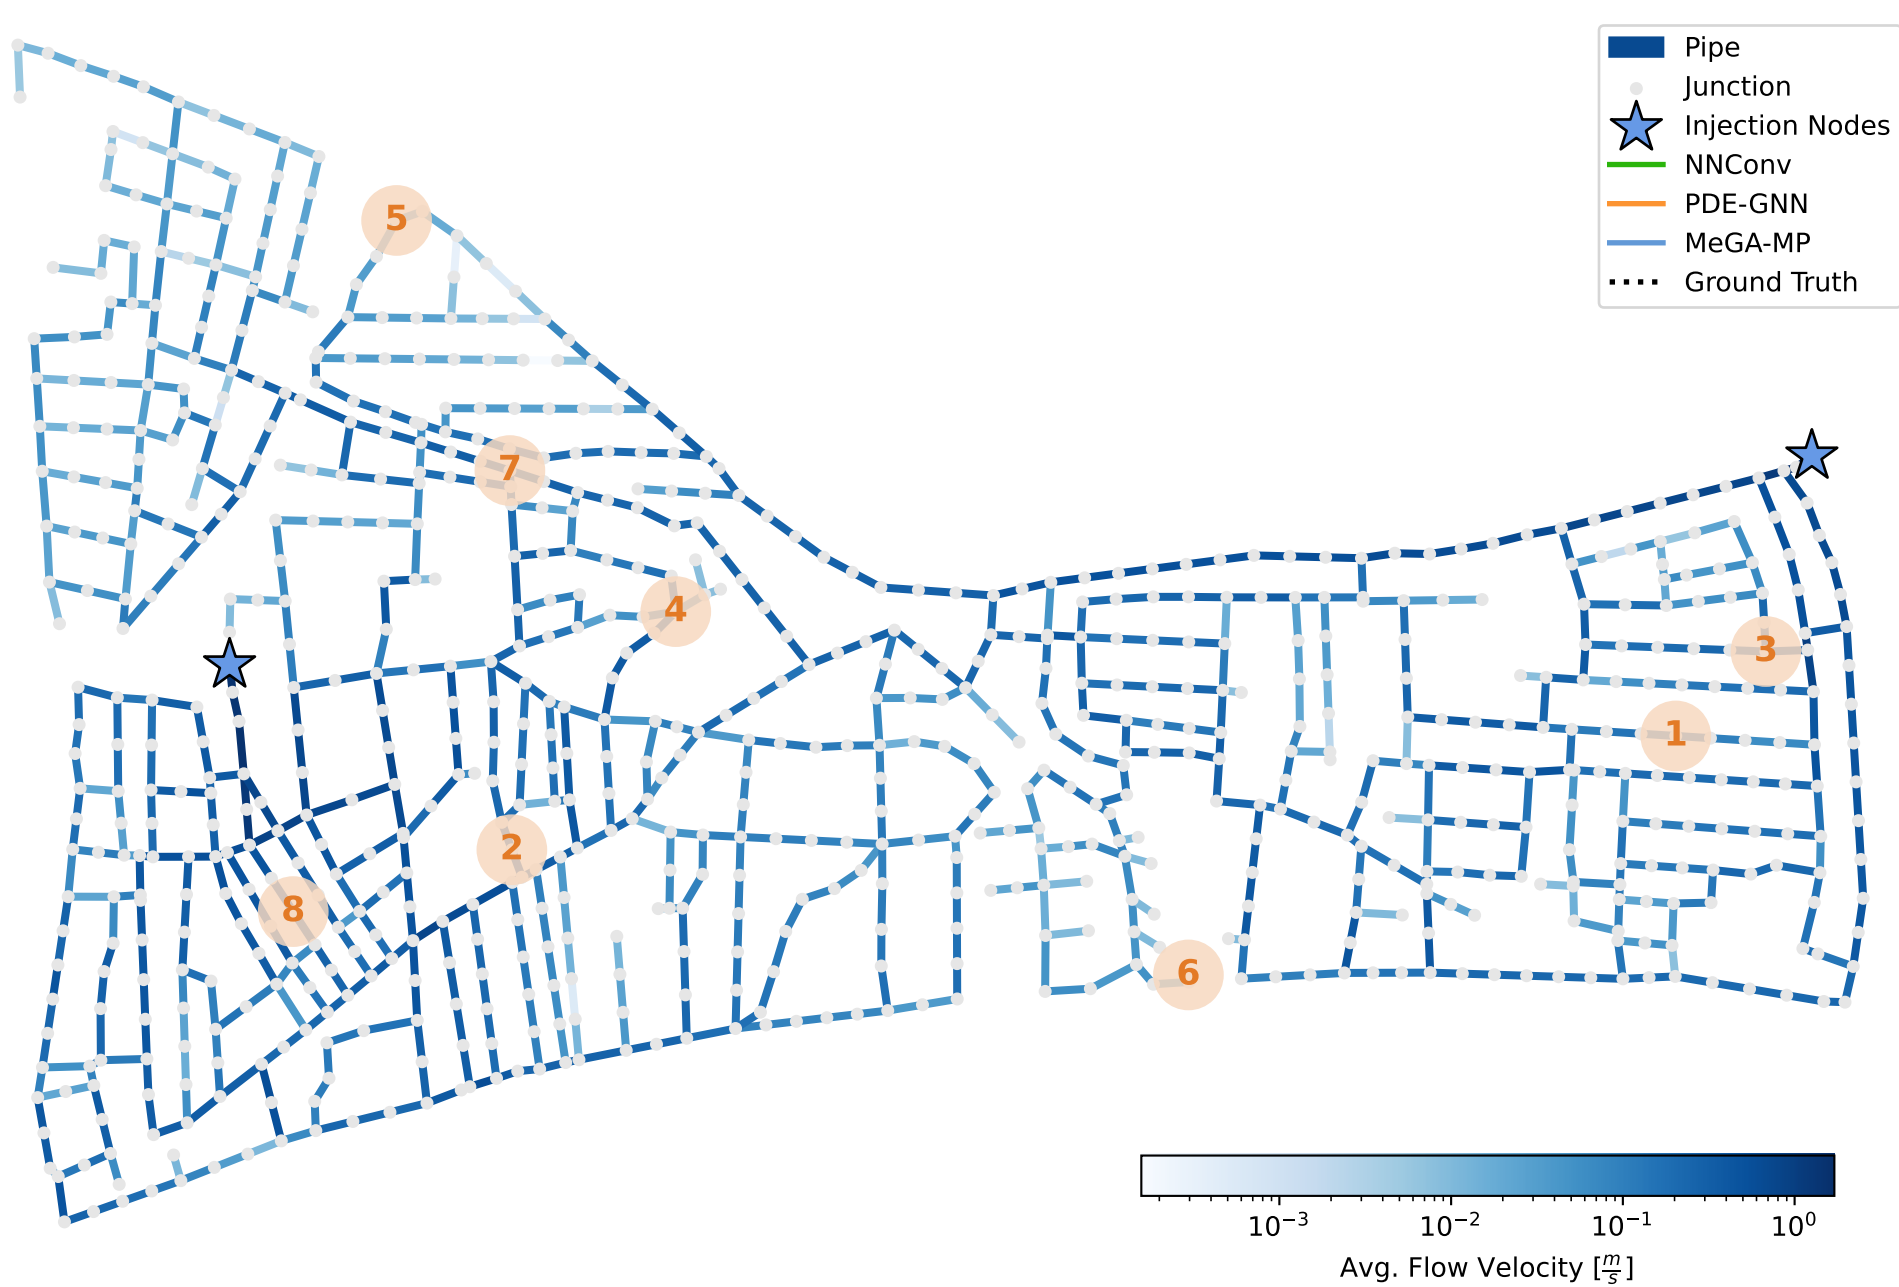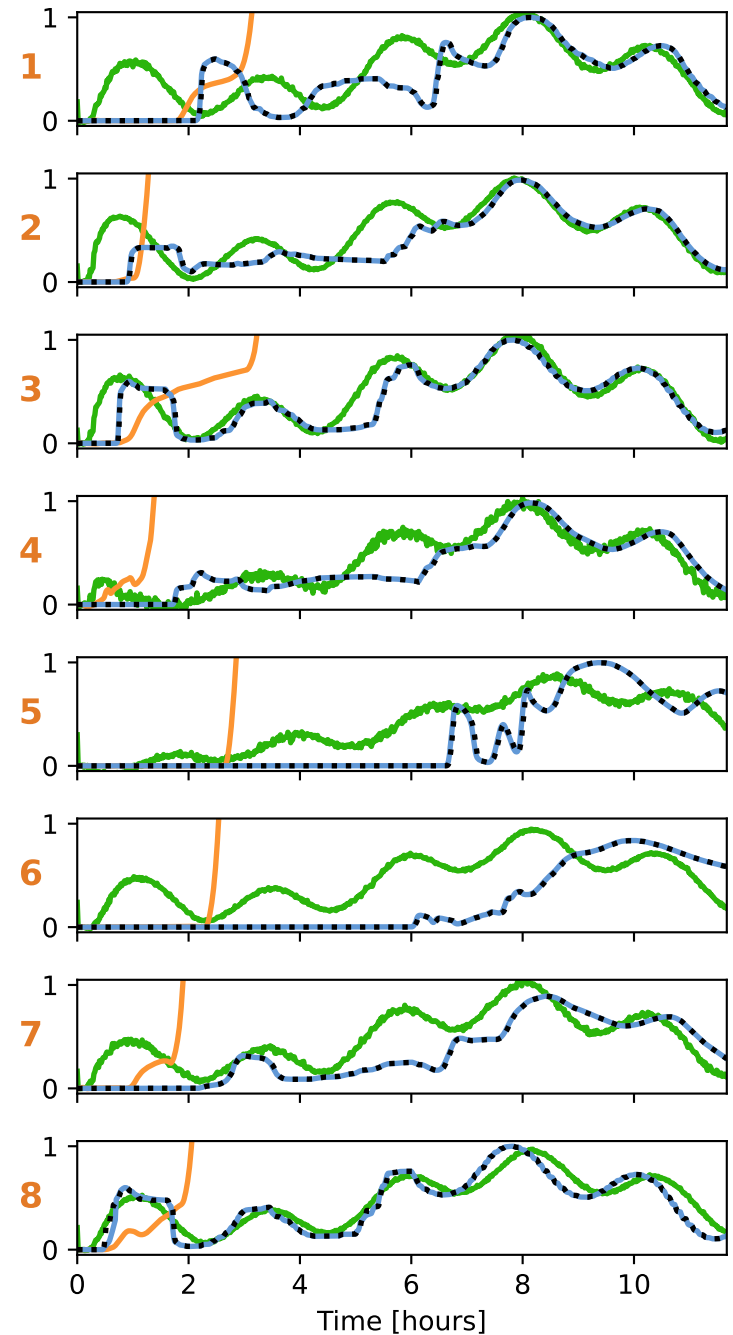

Supplement: supplementary_material [file L-Town_advection_reaction_with_map.pdf › mega_mp_advection_on_metric_graphs/Results/learning_reactions/experiment_1/L-Town_advection_reaction_with_map.pdf]

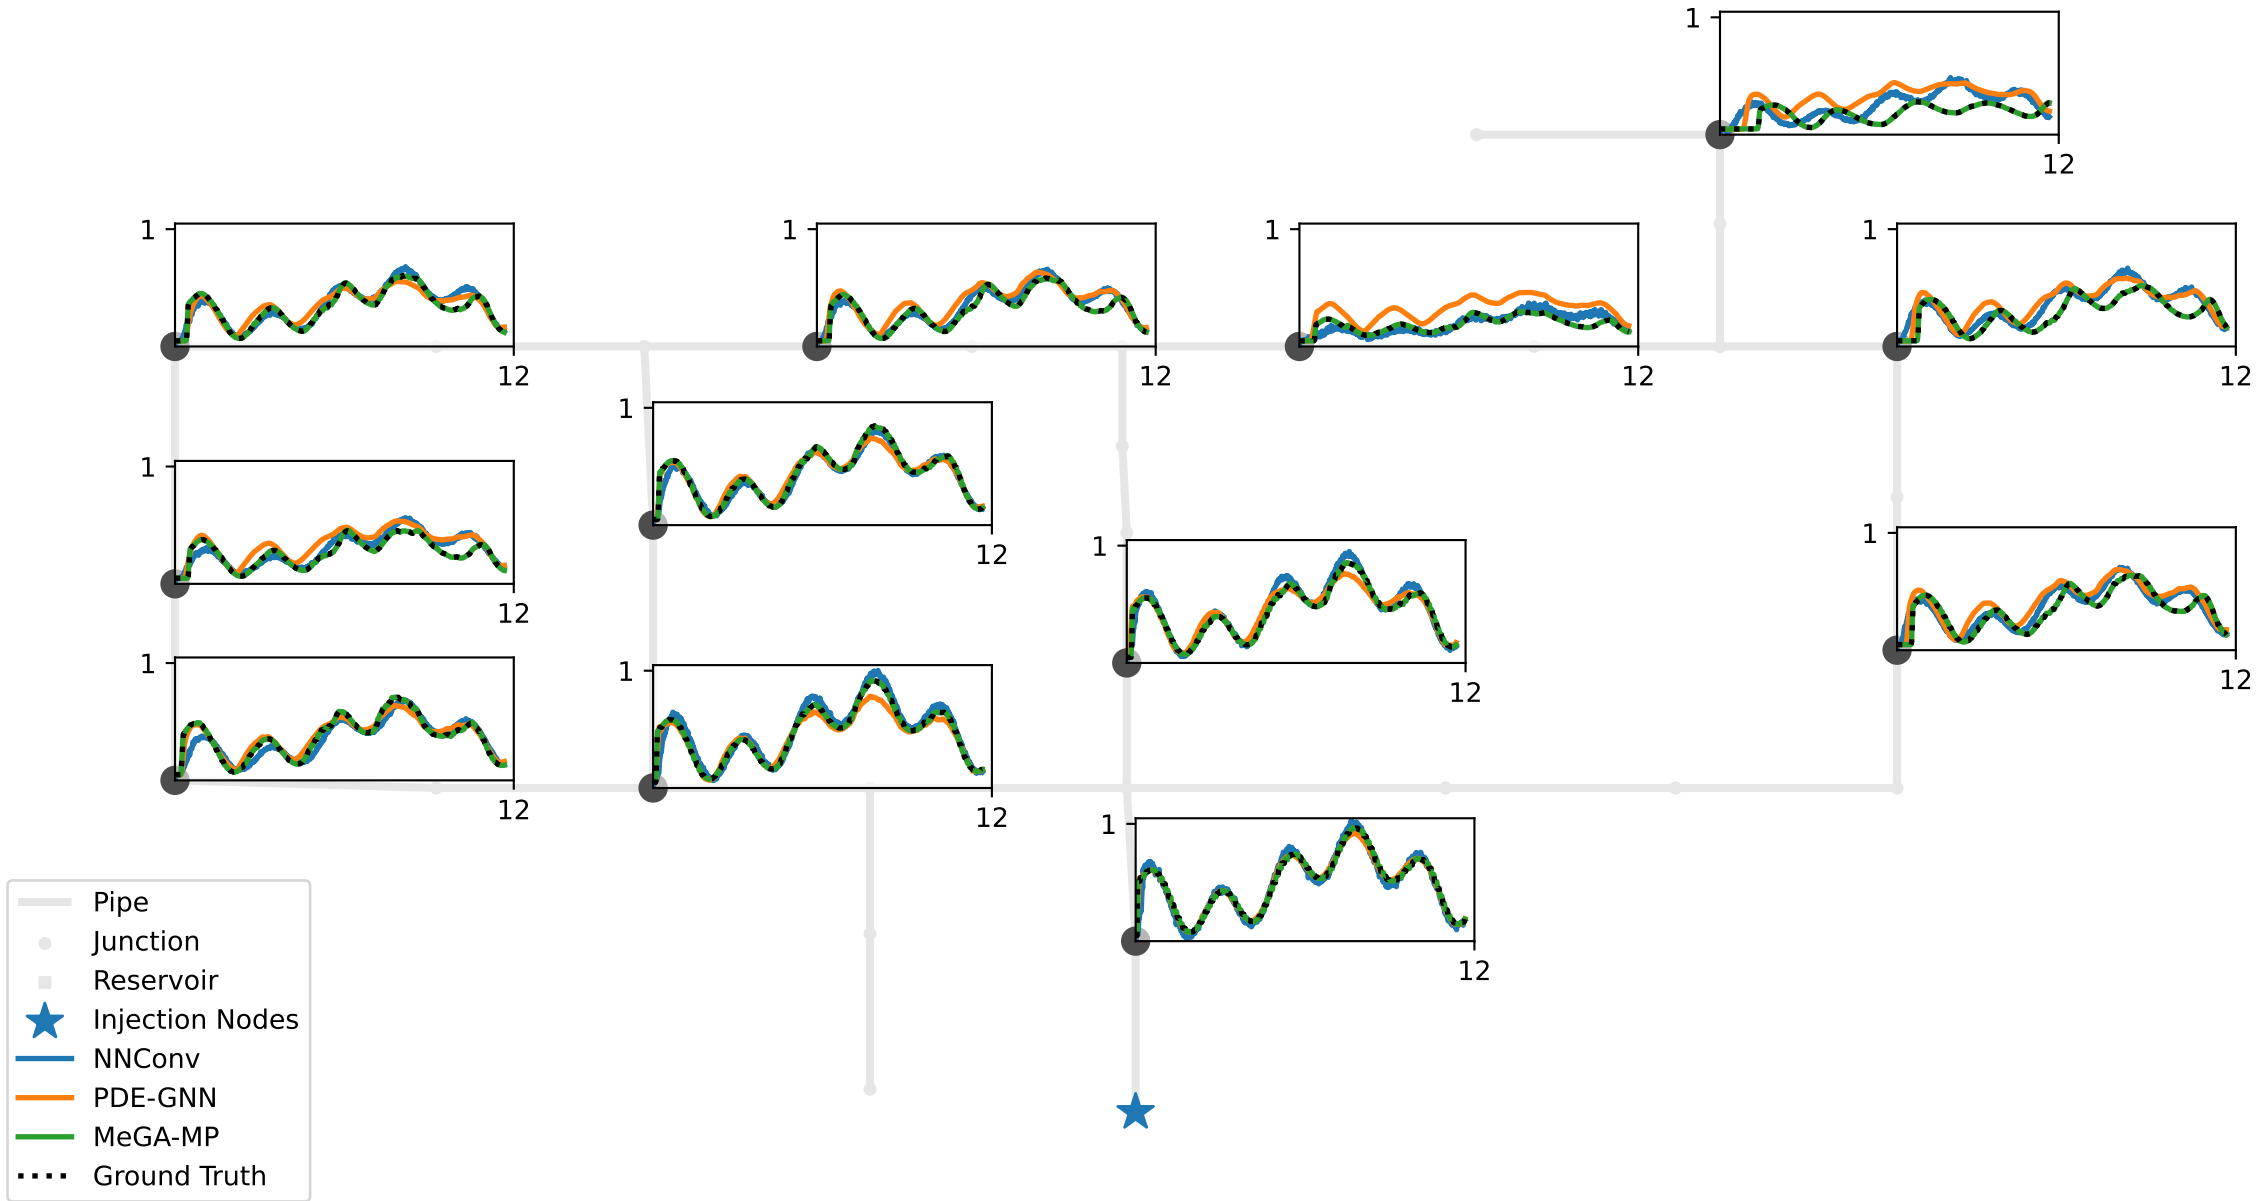

Supplement: supplementary_material [file Hanoi_advection_reaction_on_map.pdf › mega_mp_advection_on_metric_graphs/Results/learning_reactions/experiment_2/Hanoi_advection_reaction_on_map.pdf]

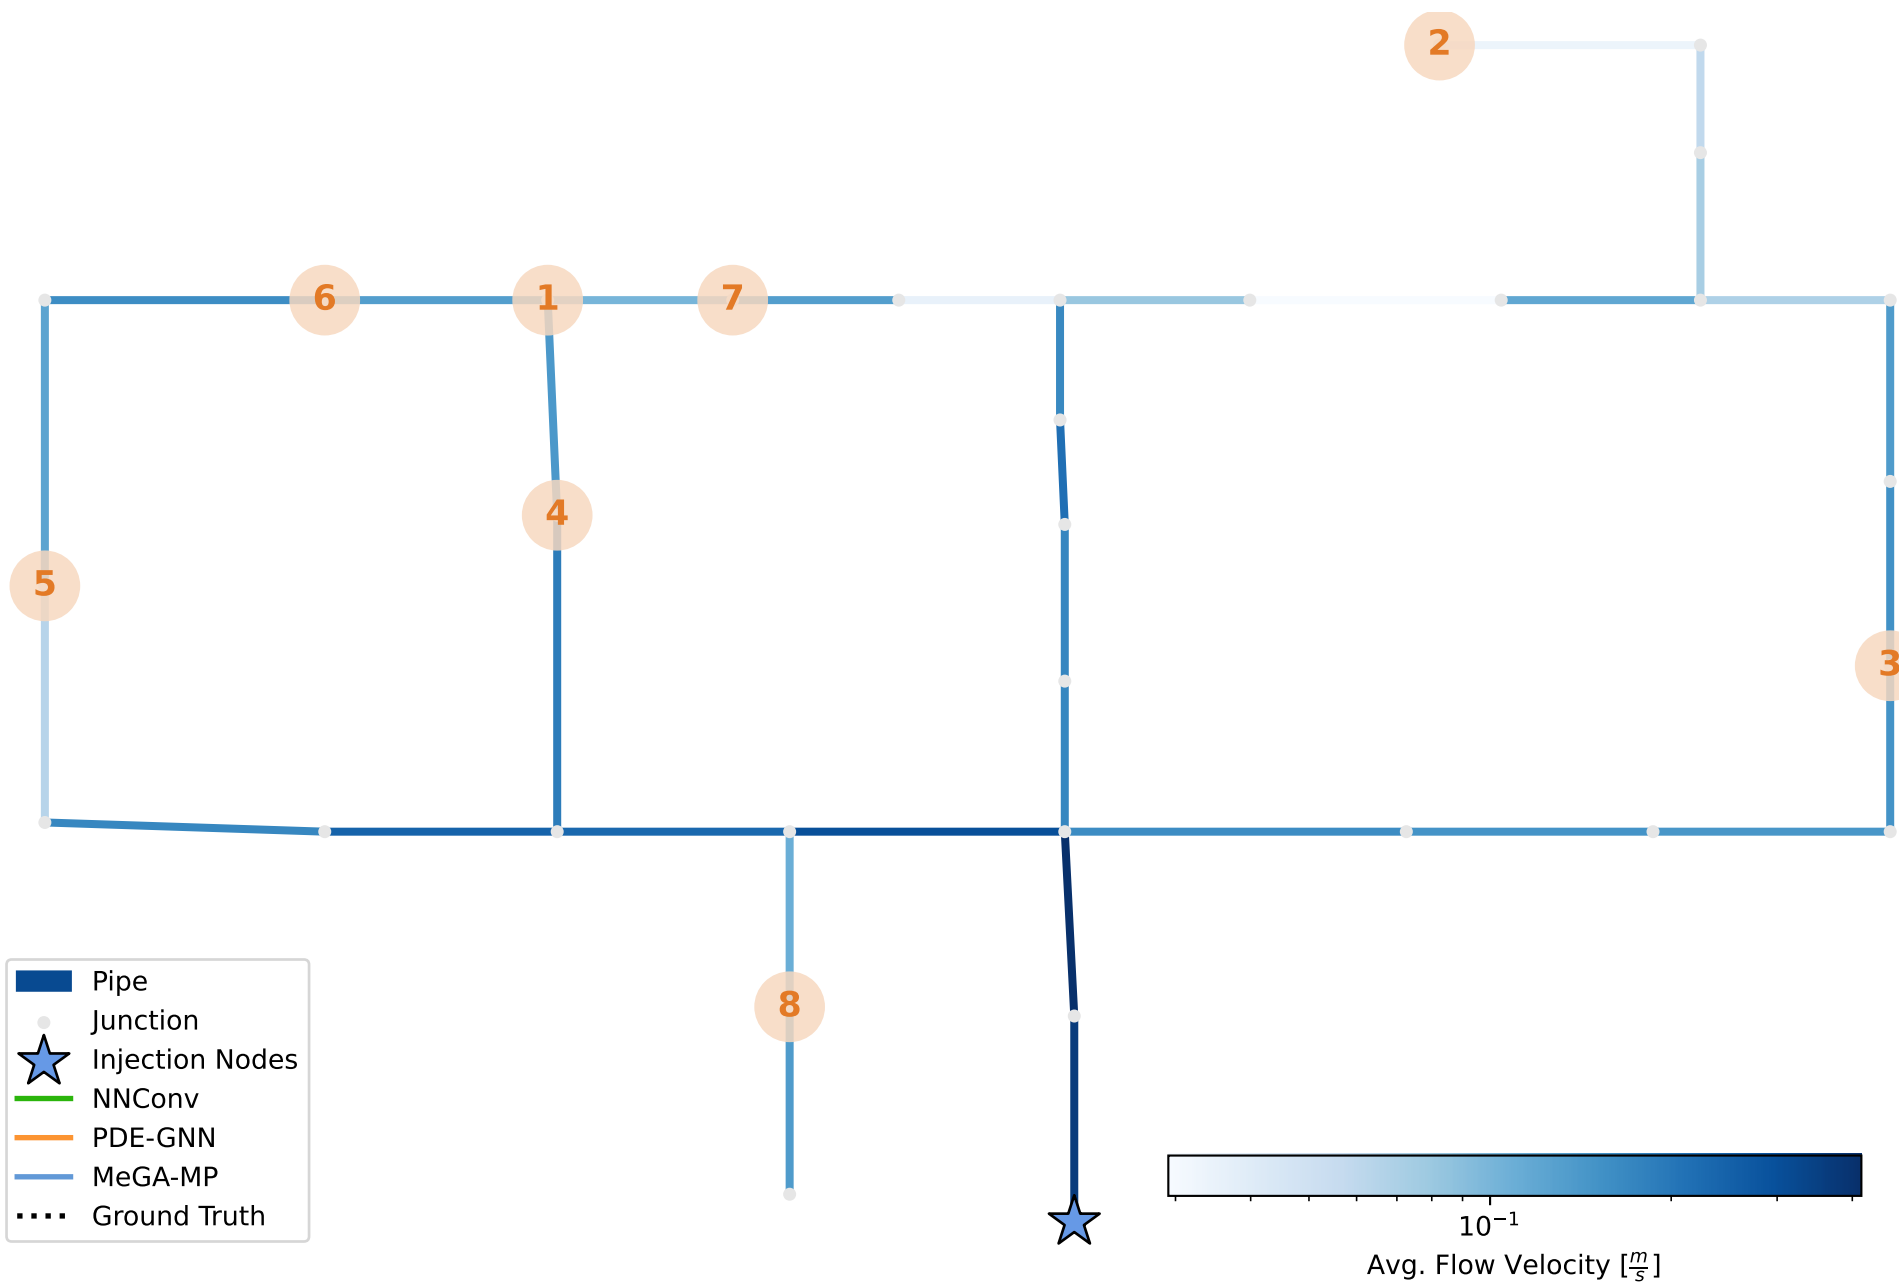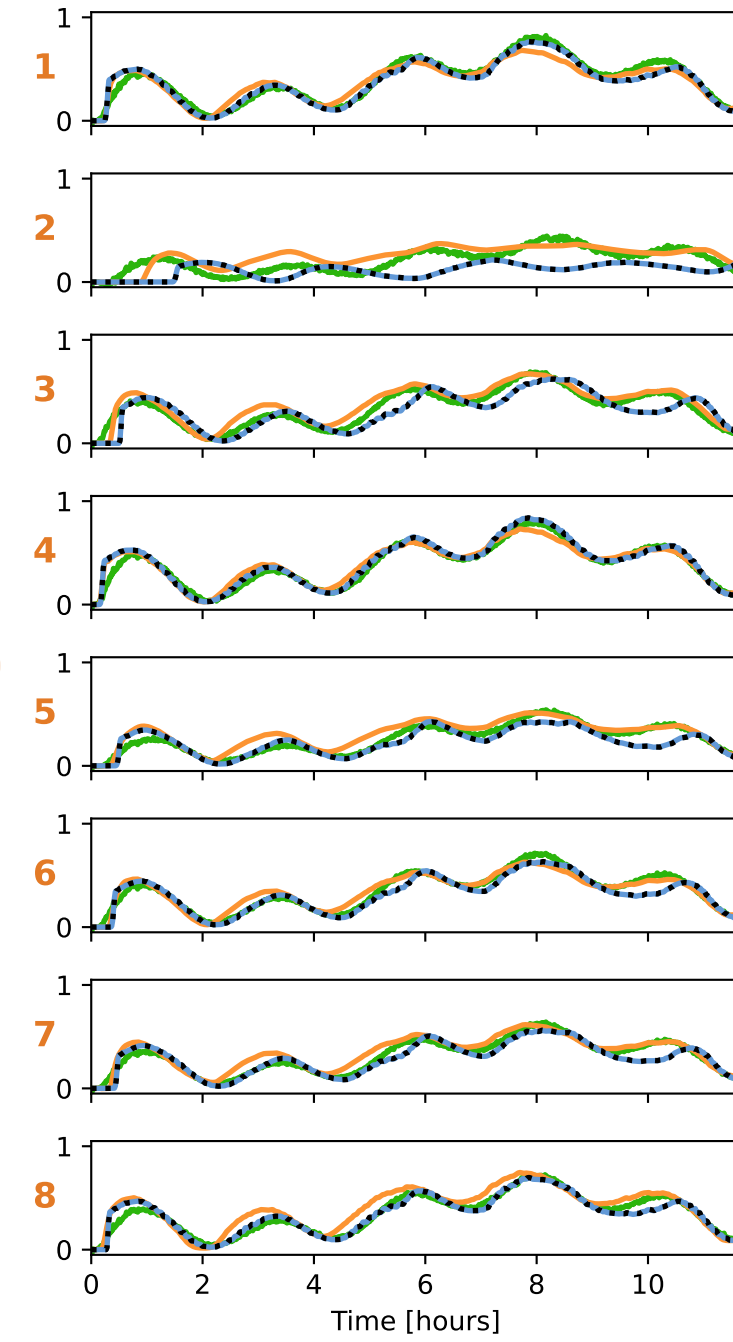

Supplement: supplementary_material [file Hanoi_advection_reaction_with_map.pdf › mega_mp_advection_on_metric_graphs/Results/learning_reactions/experiment_2/Hanoi_advection_reaction_with_map.pdf]

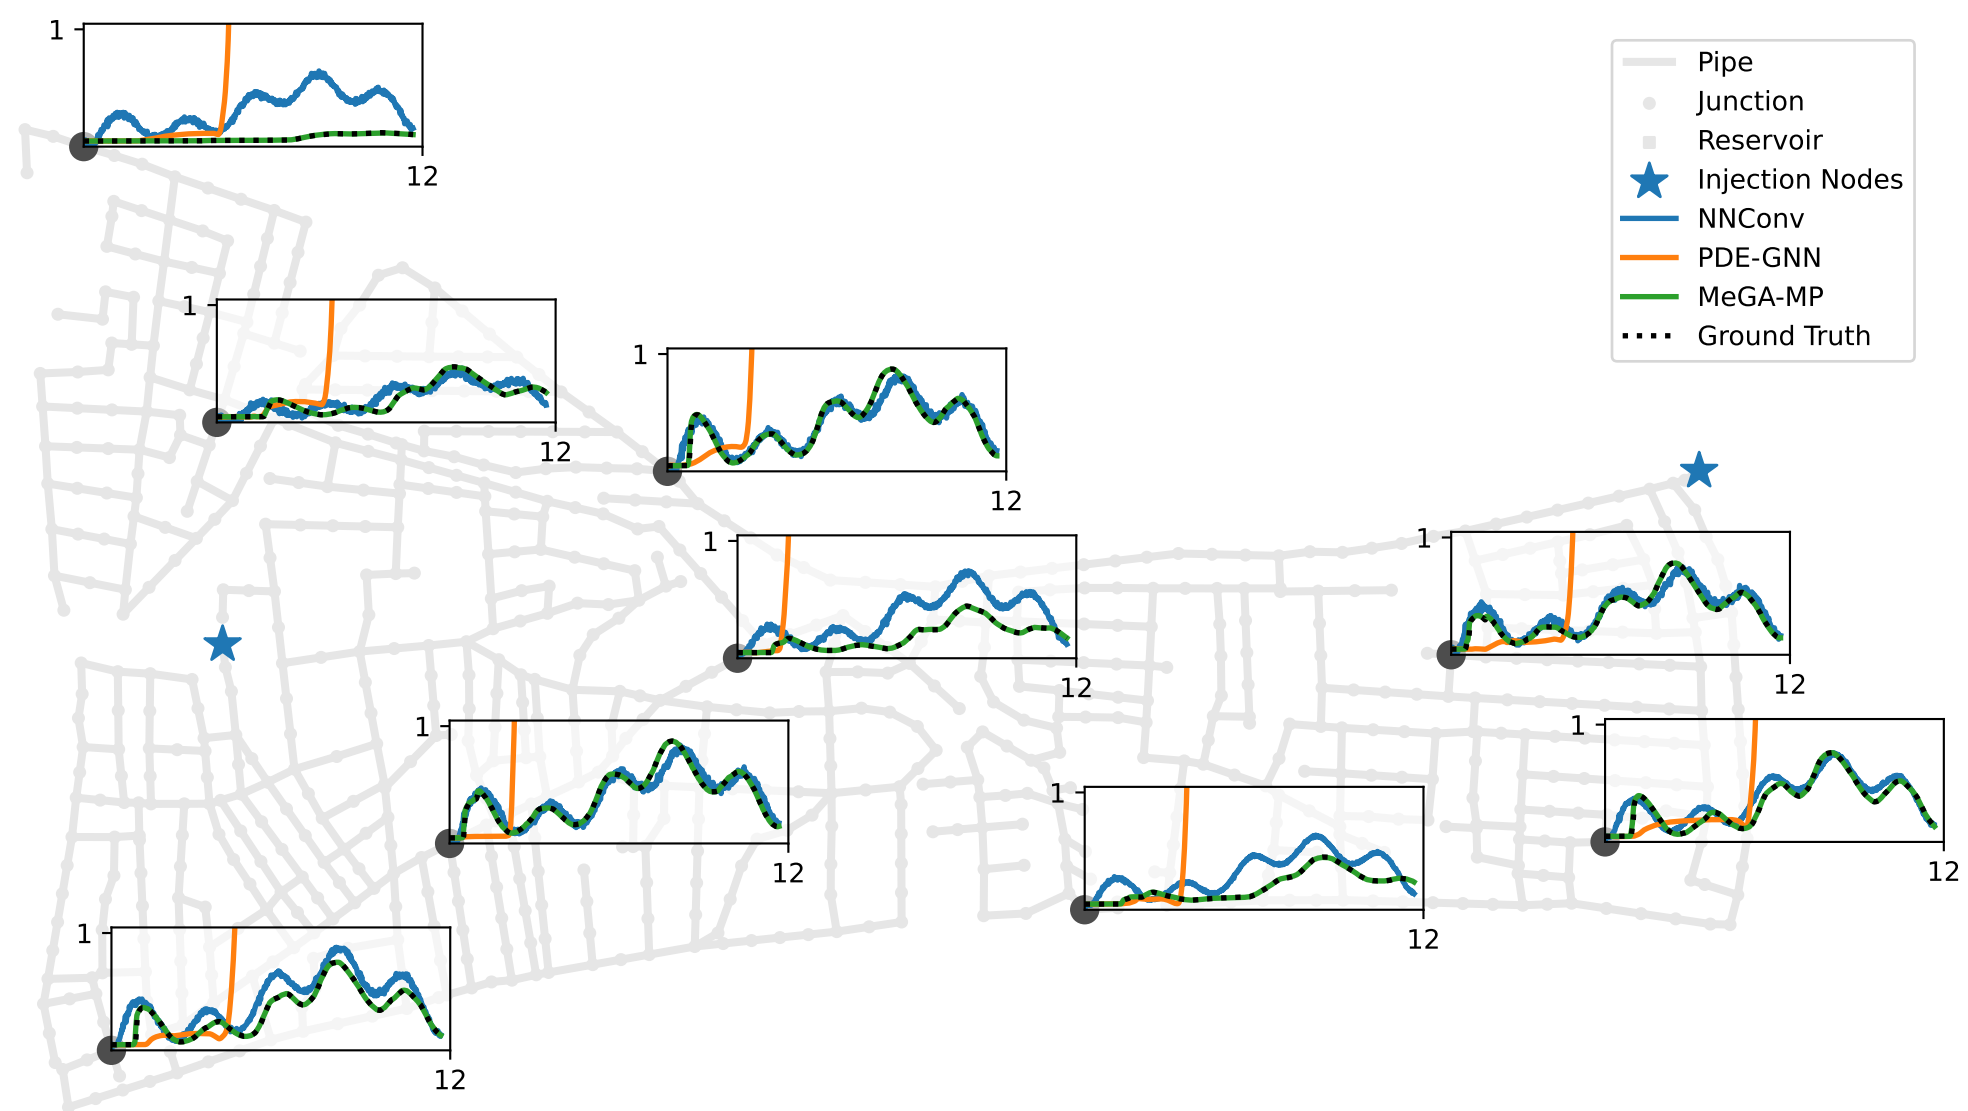

Supplement: supplementary_material [file L-Town_advection_reaction_on_map.pdf › mega_mp_advection_on_metric_graphs/Results/learning_reactions/experiment_2/L-Town_advection_reaction_on_map.pdf]

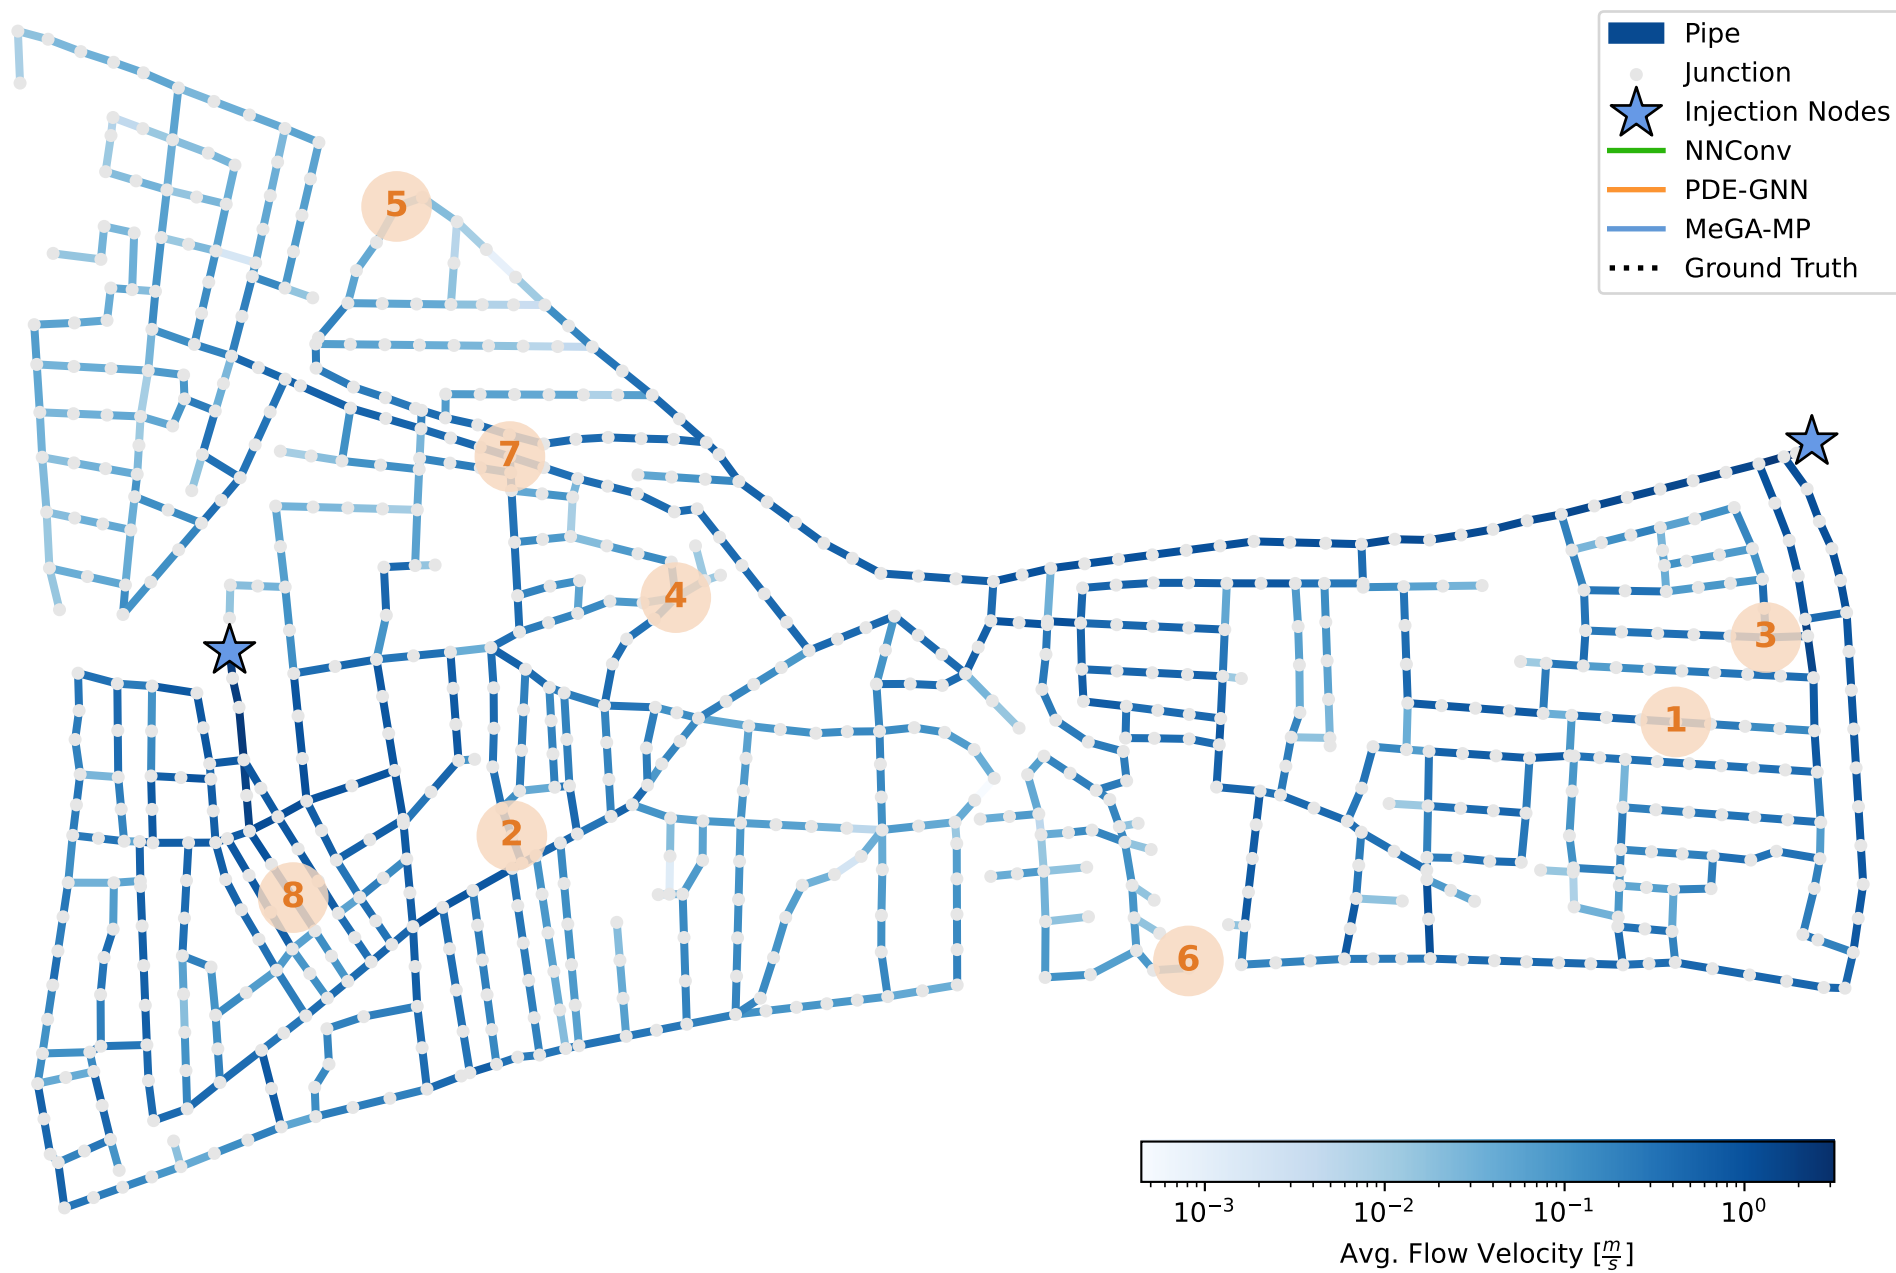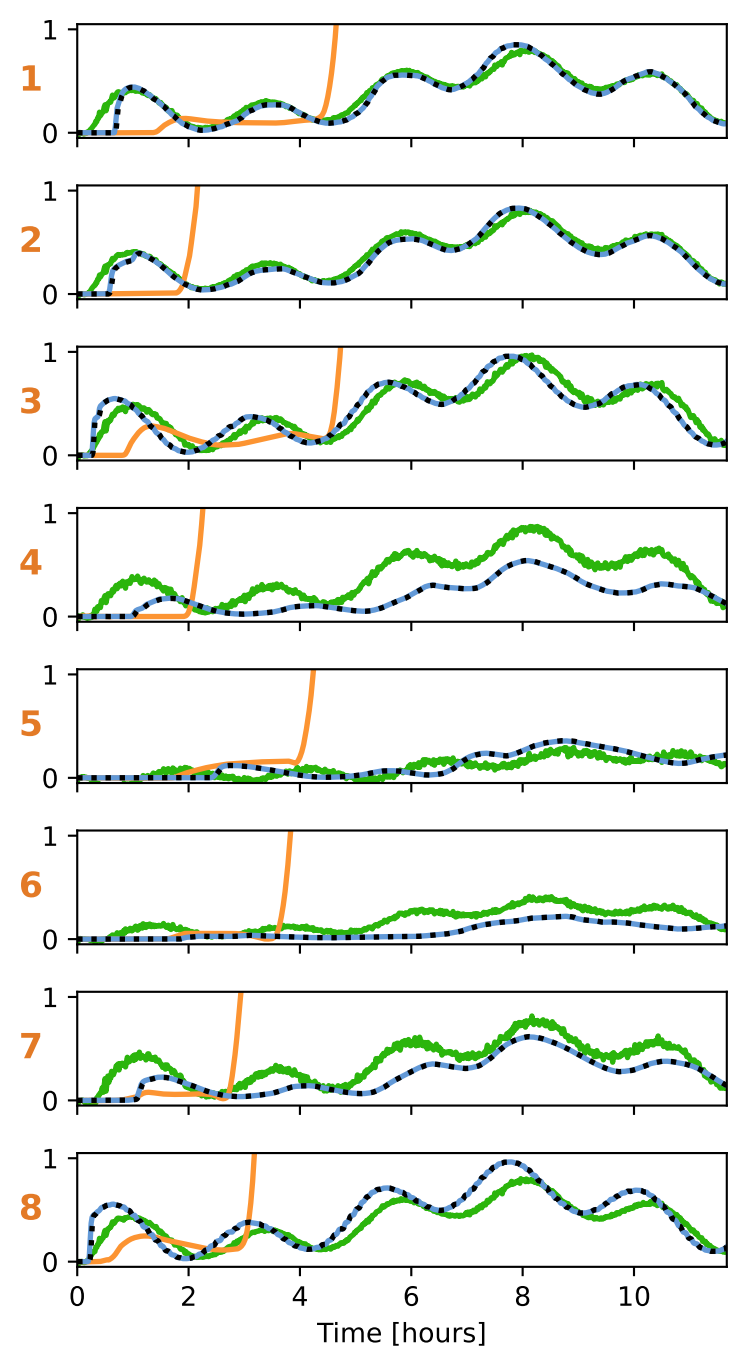

Supplement: supplementary_material [file L-Town_advection_reaction_with_map.pdf › mega_mp_advection_on_metric_graphs/Results/learning_reactions/experiment_2/L-Town_advection_reaction_with_map.pdf]

Cl Injection Pattern

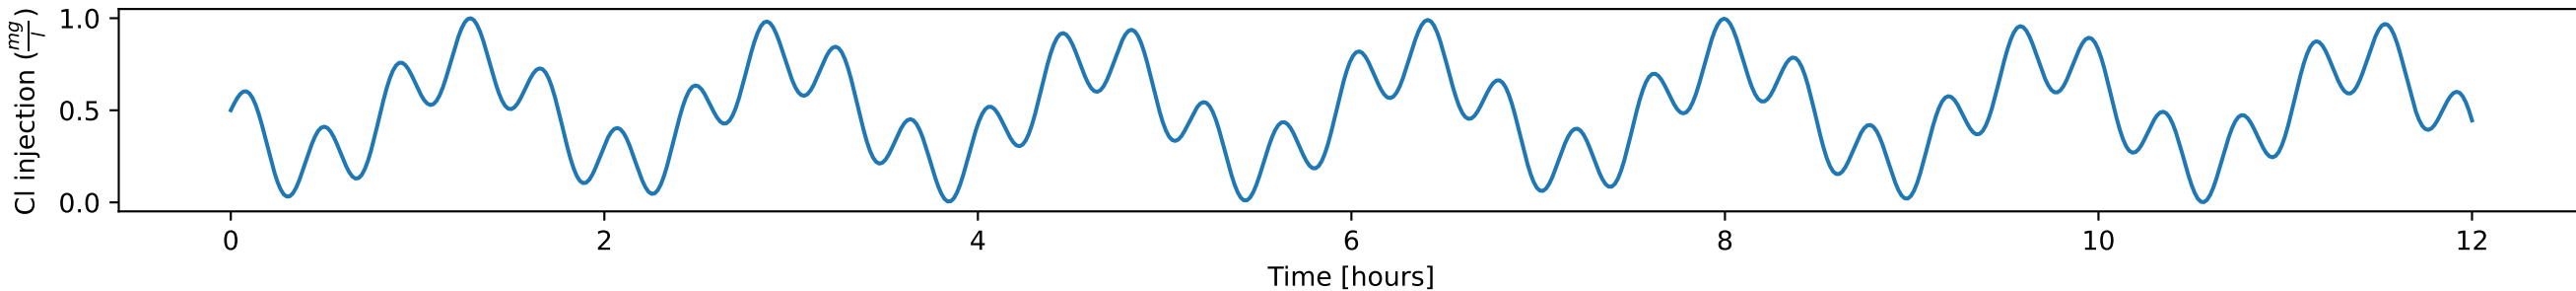

Supplement: supplementary_material [file injection_pattern.pdf › mega_mp_advection_on_metric_graphs/Results/learning_reactions/injection_pattern.pdf]
